# Supplementary material for: Host Genetic Variation Impacts SARS-CoV-2 Vaccination Response in the Diversity Outbred Mouse Population
Source: MDPI journal article supplement (doi:10.3390/vaccines12010103), 2024-01-20
Supplement: s1 [file s1]

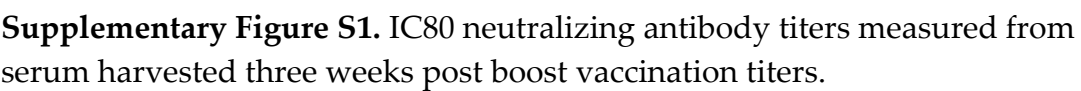

**Supplementary Figure S1.** IC80 neutralizing antibody titers measured from serum harvested three weeks post boost vaccination titers.
