# Supplementary material for: Host Genetic Variation Impacts SARS-CoV-2 Vaccination Response in the Diversity Outbred Mouse Population
Source: Vaccines (Basel). 2024 Jan 20;12(1):103. doi: 10.3390/vaccines12010103 (PMC10821422; doi:10.3390/vaccines12010103)
Supplement: Supplementary file 1 [file vaccines-12-00103-s001.zip › DO_MT_Y_Sorted.csv]

chromosome	GUDA_M_2152	GUDA_M_2154	GUDA_M_2223	GUDA_M_2148	GUDA_M_2145	GUDA_M_2183	GUDA_M_2174	GUDA_M_2099	GUDA_M_2117	GUDA_M_2139	GUDA_M_2178	GUDA_M_2149	GUDA_M_2095	GUDA_M_2108	GUDA_M_2155	GUDA_M_2166	GUDA_M_2185	GUDA_M_2180	GUDA_M_2158	GUDA_M_2143	GUDA_M_2146	GUDA_M_2124	GUDA_M_2115	GUDA_M_2100	GUDA_M_2094	GUDA_M_2090	GUDA_M_2222	GUDA_M_2082	GUDA_M_2089	GUDA_M_2217	GUDA_M_2098	GUDA_M_2173	GUDA_M_2101	GUDA_M_2078	GUDA_M_2092	GUDA_M_2157	GUDA_M_2106	GUDA_M_2080	GUDA_M_2215	GUDA_M_2189	GUDA_M_2211	GUDA_M_2206	GUDA_M_2122	GUDA_M_2224	GUDA_M_2199	GUDA_M_2176	GUDA_M_2120	GUDA_M_2197	GUDA_M_2118
MIT	ABD	ABD	E	E	E	E	E	E	E	E	E	E	E	E	ABD	H	E	E	E	E	E	E	E	E	E	E	E	E	E	E	E	E	E	E	E	E	E	E	E	F	F	F	F	F	F	F	F	F	F
Y	C	C	C	C	C	C	C	C	C	A	A	A	A	A	A	A	B	B	B	B	B	B	B	B	B	B	B	B	B	D	D	D	D	D	D	G	E	E	E	G	G	G	G	G	G	G	G	G	G
[truncated: 99 more columns]
