# Supplementary material for: Host Genetic Variation Impacts SARS-CoV-2 Vaccination Response in the Diversity Outbred Mouse Population
Source: Vaccines (Basel). 2024 Jan 20;12(1):103. doi: 10.3390/vaccines12010103 (PMC10821422; doi:10.3390/vaccines12010103)
Supplement: Supplementary file 1 [file vaccines-12-00103-s001.zip › DO_Sorted_Autosomes.csv]

chromosome	position	marker	GUDA_M_2095	GUDA_M_2149	GUDA_M_2108	GUDA_M_2178	GUDA_M_2118	GUDA_M_2211	GUDA_M_2087	GUDA_M_2197	GUDA_M_2199	GUDA_M_2122	GUDA_M_2206	GUDA_M_2145	GUDA_M_2117	GUDA_M_2174	GUDA_M_2148	GUDA_M_2183	GUDA_M_2115	GUDA_M_2090	GUDA_M_2180	GUDA_M_2076	GUDA_M_2126	GUDA_M_2131	GUDA_M_2161	GUDA_M_2150	GUDA_M_2112	GUDA_M_2194	GUDA_M_2113	GUDA_M_2191	GUDA_M_2179	GUDA_M_2133	GUDA_M_2195	GUDA_M_2111	GUDA_M_2219	GUDA_M_2097	GUDA_M_2103	GUDA_M_2132	GUDA_M_2093	GUDA_M_2205	GUDA_M_2110	GUDA_M_2135	GUDA_M_2225	GUDA_M_2212	GUDA_M_2116	GUDA_M_2159	GUDA_M_2080	GUDA_M_2106	GUDA_M_2215
1	5069641	S3N010202785	A	A	A	A	A	A	A	A	A	A	A	A	H	A	A	A	A	A	A	A	A	A	H	H	A	A	A	A	H	H	H	A	H	A	H	A	H	H	A	A	A	A	A	A	H	H	A
1	8554130	gUNC66010	H	H	H	G	G	G	G	G	G	G	H	G	G	G	G	G	G	G	G	G	G	G	G	G	G	G	G	G	G	G	G	G	G	G	G	G	G	G	G	G	G	G	G	G	G	G	G
1	9549819	S6J010381992	C	H	C	H	H	H	C	H	C	C	C	C	C	C	C	C	C	C	C	C	C	C	C	C	C	C	C	C	C	C	C	C	C	C	C	C	C	C	H	C	C	H	C	C	C	C	C
1	10325610	gJAX00241755	C	C	C	C	C	C	C	C	C	C	C	C	H	C	C	C	C	C	C	C	C	C	H	H	C	C	C	C	H	H	H	C	H	C	H	C	H	H	C	C	C	C	C	C	H	H	C
1	18309936	SS1010732397	A	A	A	A	A	A	A	A	A	A	A	A	A	A	A	A	H	H	A	A	A	A	A	A	A	A	C	C	H	H	A	A	A	A	A	A	A	A	H	A	A	H	A	A	A	A	A
1	20679054	SAJ010827162	H	G	H	H	A	A	A	A	A	A	H	H	A	H	H	H	A	A	A	A	A	A	A	A	A	A	A	A	A	A	H	A	A	A	A	A	A	A	A	A	A	A	A	A	A	A	A
1	21911249	SS1010876449	C	C	C	C	C	C	C	C	C	C	C	C	C	C	C	C	H	H	C	C	C	C	C	C	C	C	C	C	C	C	C	C	C	C	C	C	C	C	H	C	C	H	C	C	C	C	C
1	27569004	gUNC339202	C	C	C	C	C	C	C	C	C	C	C	C	C	C	C	C	C	C	C	C	C	C	C	C	C	C	C	C	C	C	C	T	C	H	H	H	H	C	H	T	T	T	H	T	C	C	C
1	30658791	B10010030658	H	A	H	A	A	A	A	A	A	A	A	H	A	A	A	H	A	A	A	H	H	H	A	A	H	H	A	A	H	H	H	A	T	A	H	A	H	H	H	A	A	A	H	A	H	H	A
1	35512780	SS1011420511	H	G	H	H	G	G	G	G	G	G	G	H	G	G	G	H	G	G	G	G	G	G	G	G	G	G	G	G	G	G	G	G	G	G	G	G	G	G	G	G	G	G	G	G	G	G	G
1	38973121	S6J011558924	G	G	G	G	G	G	G	G	G	G	G	G	H	H	H	G	G	G	G	G	G	G	G	G	G	G	G	G	G	G	G	G	H	G	H	H	H	H	G	G	G	G	G	G	G	G	G
1	48158243	gUNC612760	G	G	G	G	G	G	G	G	G	G	G	G	G	G	G	G	H	H	G	G	G	G	G	G	G	G	G	G	G	G	G	G	G	G	G	G	G	G	G	G	G	G	G	G	G	G	G
1	50980304	gJAX00250282	C	C	C	C	C	C	C	C	C	C	C	H	C	C	C	H	C	C	C	C	C	H	C	H	H	H	C	C	C	C	C	C	C	C	C	C	C	C	C	C	C	C	C	C	C	C	C
1	61312969	gJAX00252751	C	C	C	C	H	H	H	H	H	H	C	H	C	C	C	H	C	C	C	C	C	H	H	H	H	H	C	C	H	T	H	H	H	H	C	C	C	C	H	C	H	H	C	H	C	C	H
1	64700440	SAJ012588017	T	T	T	T	T	T	T	T	T	T	T	T	T	T	T	T	T	T	T	T	T	T	T	T	T	T	T	T	T	T	T	T	T	T	T	T	T	T	T	T	T	T	T	T	T	T	T
1	68987254	S6Y012759490	H	A	H	H	H	H	H	H	H	H	A	A	H	H	H	A	A	A	A	H	H	A	A	A	A	A	H	H	H	A	A	H	H	A	H	H	H	A	H	A	A	A	H	A	G	H	A
1	69313994	S6H012772559	H	T	H	H	H	H	H	H	H	H	T	T	H	H	H	T	T	T	T	H	H	T	T	T	T	T	H	H	H	T	T	H	H	T	C	C	C	H	H	T	T	T	H	T	C	H	T
1	74916505	B6_01-074963079-S	H	C	H	H	C	C	H	C	C	C	C	C	C	C	C	C	C	H	H	H	H	C	C	C	C	C	H	H	T	T	H	C	H	C	H	H	H	H	C	C	C	C	C	C	T	T	H
1	75325708	SS1013013028	A	A	A	A	A	A	A	A	A	A	A	A	A	A	A	A	A	A	A	A	A	H	A	A	A	H	H	H	A	A	H	A	A	A	A	A	A	A	H	H	H	A	G	H	A	A	A
1	75486756	S6J013019470	H	A	H	H	A	A	H	A	A	A	A	A	A	A	A	A	A	H	H	H	H	H	A	A	A	H	H	H	H	H	A	A	A	A	H	H	H	H	A	A	A	A	A	A	G	H	A
1	75978380	SS1013039135	C	C	C	C	C	C	C	C	C	C	C	C	C	C	C	C	C	C	C	C	C	C	H	H	H	C	H	H	C	C	H	C	C	C	C	C	C	C	H	H	H	C	T	H	C	C	C
1	78233405	DZO013129336	G	G	G	G	H	H	H	H	H	H	G	H	G	H	H	H	G	G	G	H	H	G	G	G	G	G	G	G	G	G	G	H	G	G	H	H	G	G	G	G	G	G	G	G	G	G	G
1	78486797	S6J013139471	C	H	H	H	H	C	C	H	H	H	H	C	H	H	H	C	H	H	H	C	C	H	C	C	C	H	T	T	C	C	H	C	C	H	H	H	H	H	C	C	C	C	C	C	T	H	C
1	79469566	S6J013178782	H	H	H	H	H	G	G	H	H	H	H	G	H	H	H	G	H	H	H	G	G	G	G	G	G	G	A	A	G	G	H	G	G	H	H	H	H	H	G	G	G	G	G	G	A	H	G
1	84908968	gJAX00006124	C	C	C	C	C	C	C	C	C	C	C	C	C	C	C	C	C	C	C	C	C	C	C	C	C	C	C	C	C	C	C	C	C	C	C	C	C	C	C	C	C	C	C	C	C	C	C
1	92116262	SAC013684650	H	H	H	H	A	H	G	A	H	A	H	G	G	G	G	G	G	G	G	G	G	G	G	G	G	G	G	G	G	G	G	G	G	G	G	G	G	G	G	G	G	G	G	G	G	G	G
1	93787372	SNJ013751494	C	H	C	C	C	C	H	C	C	C	H	C	H	H	H	C	C	C	C	C	C	C	C	C	C	C	C	H	C	C	C	C	H	H	C	C	H	H	C	H	H	C	H	C	T	H	C
1	95217425	SAJ013808697	H	G	G	G	G	G	G	G	G	G	G	H	G	H	H	H	G	G	G	G	G	G	G	G	G	G	G	G	G	G	G	G	G	G	G	G	G	G	G	G	G	G	G	G	G	G	G
1	101445475	gJAX00260958	G	H	G	G	G	G	H	G	G	G	H	G	G	G	G	G	G	G	G	G	G	H	H	A	A	H	G	G	G	G	G	G	G	G	G	G	G	G	H	H	H	A	G	H	G	G	G
1	102042988	gUNC1276993	T	H	T	T	H	H	G	H	H	H	G	G	G	G	G	G	T	T	T	H	H	H	H	G	G	H	T	H	H	H	T	G	G	G	G	G	G	G	G	G	G	G	G	G	G	G	H
1	106344762	gJAX00007709	H	G	G	G	G	G	G	G	G	G	G	G	G	G	G	G	G	G	G	G	G	G	G	G	G	G	G	G	G	G	G	G	G	G	G	G	G	G	G	G	G	G	G	G	G	H	H
1	107852632	gUNC1359274	T	T	T	T	T	T	T	T	T	T	T	T	T	T	T	T	T	T	T	T	T	T	T	T	T	T	T	T	T	T	T	T	T	T	T	T	T	T	T	T	T	T	T	T	C	H	T
1	119417051	SAJ014776682	G	G	G	G	G	G	G	G	G	G	G	G	G	G	G	G	G	G	G	G	G	G	G	G	G	G	G	G	G	G	G	G	G	G	G	G	G	G	G	G	G	G	G	G	H	G	G
1	126399207	SS1015055968	G	G	G	G	H	G	G	H	G	H	G	G	G	G	G	G	G	G	G	H	H	G	G	G	G	G	G	G	G	G	G	H	G	G	G	G	G	G	G	G	G	G	G	G	G	G	G
1	129943219	S2C015197728	C	C	C	C	C	C	C	C	C	C	C	C	C	C	C	C	C	C	C	C	C	C	C	C	C	C	H	C	H	H	H	H	H	H	H	H	H	H	H	C	C	C	H	H	C	C	C
1	132786434	SFT015311457	C	C	C	C	C	C	C	C	C	C	C	C	C	C	C	C	C	C	C	H	H	C	C	C	C	C	C	C	H	H	C	C	C	C	C	C	C	C	C	C	C	C	C	C	C	C	C
1	134859002	gUNCHS002460	G	G	G	G	G	G	G	G	G	G	G	G	G	G	G	G	H	H	H	G	G	G	G	G	G	G	G	G	G	G	G	G	G	G	G	G	G	G	G	G	G	G	G	G	G	G	G
1	136302702	S6J015452108	C	C	C	C	C	C	C	C	C	C	C	C	C	C	C	C	C	C	C	C	C	H	H	C	C	H	C	C	C	C	C	C	C	C	C	C	C	C	C	C	C	C	C	C	C	C	C
1	136791628	SAJ015471665	G	H	H	H	G	H	H	G	H	H	H	H	G	G	G	H	A	A	A	G	G	H	H	G	G	H	H	G	H	H	H	G	G	G	G	G	G	G	G	G	G	G	G	G	G	G	H
1	144549292	mUNC010463165	C	C	C	C	C	C	C	C	C	C	C	C	C	C	C	C	C	C	C	C	C	C	C	C	C	C	C	C	C	C	C	C	C	C	C	C	C	C	C	H	A	H	H	C	C	C	C
1	147699660	gJAX00270549	T	T	T	T	T	T	T	T	T	T	T	T	T	T	T	T	T	T	T	T	T	T	T	T	T	T	T	T	T	T	T	T	T	T	T	T	T	T	T	T	T	T	T	T	T	T	T
1	148717254	gUNCHS002697	G	G	G	G	G	G	G	G	G	G	G	G	G	G	G	G	G	G	G	G	G	G	G	G	G	G	G	G	G	G	G	G	G	G	G	G	G	G	G	H	A	H	A	H	G	G	G
1	152859436	SAJ016114377	T	C	H	H	T	T	H	T	H	T	H	H	T	H	T	H	H	H	H	H	H	C	C	H	H	C	T	T	T	T	T	T	T	T	T	T	T	T	T	T	T	T	T	T	H	H	H
1	159383312	S6J016375332	C	C	C	C	C	C	C	C	C	C	C	C	C	C	C	C	C	C	C	C	C	H	H	H	H	H	C	C	C	C	C	C	C	C	C	C	C	C	C	C	C	C	C	C	C	C	C
1	159861726	S2H016394469	C	H	H	H	C	C	C	C	C	C	C	C	C	C	C	C	C	C	C	C	C	C	C	C	C	C	C	C	C	C	C	C	C	C	C	C	C	C	C	C	C	C	C	C	C	C	C
1	160224951	S1J016408998	A	H	H	H	A	A	A	A	A	A	A	A	A	A	A	A	H	A	H	A	A	A	A	A	A	A	A	A	A	A	A	A	A	A	A	A	A	A	A	A	A	A	A	A	A	A	A
1	160834897	S6J016433395	C	C	C	C	H	C	C	C	C	C	C	C	C	C	C	C	C	C	C	C	C	H	H	H	H	H	C	C	C	C	C	C	C	C	C	C	C	C	C	C	C	C	C	C	C	C	H
1	164443734	ST2016577749	H	G	H	H	G	G	G	G	G	G	G	G	H	G	H	G	H	A	H	H	H	H	H	A	A	H	H	A	H	G	H	H	G	G	H	H	G	G	H	A	A	A	H	H	H	H	G
1	167677390	S6J016707095	C	H	C	C	C	C	C	C	C	C	C	C	H	C	H	C	C	C	C	C	C	C	C	C	C	C	H	C	H	H	H	C	C	C	H	H	C	C	C	C	C	C	C	C	C	C	C
1	170084149	S1H016803365	C	C	C	C	H	H	C	C	C	C	C	C	H	C	H	H	C	C	C	C	C	C	C	C	C	C	C	H	C	C	C	C	C	C	H	H	C	H	H	C	C	C	C	C	C	C	C
1	170128437	ST2016805137	C	C	C	C	C	C	C	C	C	C	C	C	C	C	C	C	H	T	H	C	C	C	C	C	C	C	C	C	C	C	C	H	H	C	C	C	C	C	C	C	C	C	H	H	C	C	C
1	180074589	SSH017202983	A	A	A	A	A	A	A	A	A	A	A	A	A	A	A	A	A	A	A	A	A	H	H	H	A	H	A	A	A	A	A	A	A	A	A	A	A	A	A	A	A	A	H	A	A	A	A
1	181318003	S6J017252720	C	C	C	C	C	C	C	C	C	C	C	C	C	C	C	C	C	C	C	C	C	C	C	C	C	C	C	C	C	C	C	C	C	C	C	C	C	C	C	C	C	C	C	C	C	C	C
1	184602143	gUNC2351991	A	A	A	A	A	A	A	A	A	A	A	A	A	A	A	A	A	A	A	A	A	A	A	A	A	A	A	A	A	A	A	A	A	A	A	A	A	A	A	A	A	A	A	A	A	A	A
1	188892174	S6J017555686	C	C	C	C	T	H	C	C	C	C	C	C	C	C	C	C	C	C	C	C	C	C	C	H	H	H	T	H	T	H	H	C	C	C	C	C	C	C	H	C	H	C	C	H	C	H	C
1	190469788	gUNC2424584	T	T	T	T	T	T	T	T	T	T	T	T	T	T	T	T	T	T	T	T	T	T	T	T	T	T	T	H	T	T	H	T	T	T	T	T	T	T	T	T	T	T	T	T	T	T	T
1	190655586	gJAX00013965	G	G	G	G	G	G	G	G	G	G	G	G	G	G	G	G	G	G	G	G	G	G	G	G	G	G	G	H	G	G	H	G	G	G	G	G	G	G	G	G	G	G	G	G	G	G	G
1	191246437	gJAX00280436	C	C	C	C	C	C	C	C	C	C	C	C	C	C	C	C	C	C	C	C	C	C	C	C	C	C	C	H	C	C	H	C	C	C	C	C	C	C	C	C	C	C	C	C	C	C	C
1	191712828	SAH017668513	G	G	G	G	G	G	G	G	G	G	G	G	G	G	G	G	G	G	G	G	G	G	G	G	G	G	G	H	G	G	H	G	G	G	G	G	G	G	G	G	G	G	G	G	G	G	G
1	192590248	S2J017703609	A	A	A	A	A	A	H	H	H	H	H	C	A	C	A	A	H	A	A	A	A	A	A	A	A	A	A	A	A	A	A	A	A	A	A	A	A	A	H	H	H	H	C	H	A	A	A
1	192939520	SX1017717580	H	H	H	A	A	A	A	A	A	A	A	A	A	A	A	A	A	A	A	A	A	A	A	A	A	A	A	A	A	A	A	A	A	A	A	A	A	A	A	A	A	A	A	A	A	A	A
1	193010973	JAX00014142	A	A	H	H	A	H	A	A	A	A	H	A	A	A	A	A	H	G	H	H	H	A	A	A	A	A	H	H	H	A	A	A	A	A	H	A	H	H	H	A	H	A	A	H	A	A	A
2	6571220	gJAX00482601	G	G	G	G	H	G	G	H	H	G	G	G	G	G	G	G	G	G	G	G	G	G	G	G	G	G	H	H	G	G	H	G	G	G	G	H	H	G	H	G	G	G	G	G	G	G	G
2	8601330	SNJ020344053	H	C	H	C	H	H	H	C	C	H	H	H	H	H	H	H	C	C	C	H	H	H	H	H	H	H	H	H	A	A	H	A	H	H	H	C	H	C	C	C	C	C	C	C	C	C	C
2	9477814	gJAX00091105	C	C	C	C	C	C	C	C	C	C	C	C	C	H	H	H	H	H	H	C	C	C	C	C	C	C	C	C	C	C	C	C	C	C	C	C	C	C	C	C	C	C	C	C	C	C	C
2	11170851	S6J020446834	G	G	G	G	G	G	G	G	G	G	G	G	G	G	G	G	G	G	G	G	G	G	G	G	G	G	G	G	G	G	G	G	G	G	G	G	G	G	H	H	G	G	G	G	G	G	G
2	11784932	gJAX00483446	T	T	T	T	T	T	T	T	T	T	T	H	H	H	H	H	H	T	T	T	T	H	T	C	C	H	T	T	T	T	T	H	H	H	H	T	H	T	T	T	T	T	T	T	T	T	T
2	12863553	gJAX00091360	C	C	C	C	C	C	C	C	C	C	C	C	C	C	C	C	C	C	C	H	H	C	C	C	C	C	C	C	C	C	C	C	H	C	C	C	C	C	C	C	C	C	C	C	C	C	C
2	15062468	mUNC2624191	G	G	G	G	G	G	G	G	G	G	G	G	G	G	G	G	G	H	H	G	H	G	G	G	G	G	G	G	G	G	G	G	H	G	G	G	G	G	G	G	G	G	G	G	G	G	G
2	17092645	mJAX00484113	A	A	A	A	A	A	A	A	A	A	A	A	A	A	A	A	A	H	H	A	H	A	A	A	A	A	A	A	A	A	A	A	H	A	A	A	A	A	A	A	A	A	A	A	A	A	A
2	19473898	B10020019473	C	C	C	C	H	C	C	C	C	C	C	C	C	C	C	C	T	H	H	H	C	H	H	H	H	H	C	C	C	C	C	C	C	C	C	C	C	C	C	C	C	C	C	C	C	C	C
2	25029526	gJAX00485387	C	C	C	C	C	C	C	C	C	C	C	C	C	C	C	C	C	H	H	C	C	H	C	C	C	C	C	C	C	C	C	C	C	H	H	C	C	C	C	C	C	C	C	C	C	C	C
2	28648997	SNJ021145959	H	H	A	H	G	G	H	G	H	H	H	H	H	H	H	H	H	G	G	G	G	G	H	H	G	H	G	G	H	G	G	G	H	G	G	G	G	G	H	H	G	G	H	H	G	G	G
2	29105410	mJAX00092566	H	C	C	H	T	C	C	C	C	C	C	C	C	H	H	H	C	C	C	C	C	C	C	C	C	C	C	C	C	C	C	C	C	C	C	C	C	C	C	C	C	C	C	C	C	H	T
2	33460614	SAJ021338424	H	H	H	H	G	G	H	G	H	H	H	G	G	G	G	G	H	G	G	H	H	G	H	H	G	H	G	G	G	G	G	G	G	G	G	G	G	G	H	G	G	G	G	G	H	G	H
2	42237737	S6J021689509	C	C	C	C	T	C	C	H	C	C	C	C	C	C	C	C	C	C	C	C	C	C	C	C	C	C	C	C	C	C	C	C	H	C	C	H	C	H	C	C	H	H	H	C	H	H	C
2	42485411	SAJ021699416	T	T	T	T	T	T	T	T	T	T	T	H	H	H	H	H	T	T	T	T	T	T	T	T	T	T	H	T	H	C	H	T	H	T	T	T	T	T	T	T	T	T	T	T	H	T	H
2	43212469	SS1021728498	H	C	C	H	C	C	C	C	C	C	C	C	C	C	C	C	C	C	C	C	C	C	C	C	C	C	C	C	C	C	C	C	C	C	C	C	C	C	C	C	C	C	C	C	C	H	H
2	44536331	SBR021781453	A	A	A	A	G	A	A	H	A	A	A	A	A	A	A	A	A	A	A	A	A	A	A	A	A	A	A	A	A	A	A	A	H	A	A	H	A	H	A	A	A	A	A	A	H	H	H
2	54215373	DZO022168614	H	T	H	H	T	T	H	T	H	H	H	T	T	T	T	T	T	H	H	H	H	T	T	T	T	T	T	T	T	T	T	T	T	H	H	T	H	H	T	H	T	T	H	H	T	T	T
2	56552082	gJAX00490113	G	G	G	G	G	G	G	G	G	G	G	G	G	G	G	G	G	G	G	G	G	G	G	G	G	G	G	G	G	G	G	G	H	H	H	H	G	G	G	G	G	G	G	G	G	G	G
2	57347747	UNC3120836	G	H	H	G	A	G	G	G	G	G	G	G	G	G	G	G	G	G	G	G	G	G	G	G	G	G	G	G	G	G	G	H	G	G	G	G	G	G	G	G	G	G	G	G	H	H	H
2	63512766	SFT022540510	G	G	G	G	G	G	G	G	G	G	G	G	G	G	G	G	G	G	G	G	G	G	G	G	G	G	G	G	G	G	G	G	G	H	G	G	G	H	H	G	G	G	G	G	H	H	G
2	70488441	SNJ022819537	A	H	A	A	A	A	H	A	H	H	A	A	A	A	A	A	A	A	A	A	H	H	H	A	H	A	A	A	A	A	A	H	A	A	A	A	H	H	A	A	A	A	A	A	A	H	H
2	81645974	S2R023265838	G	G	G	G	G	G	G	G	G	G	G	G	G	G	G	G	G	G	G	G	G	G	G	G	G	G	H	G	G	H	H	G	G	G	G	G	G	G	G	G	G	G	G	G	G	G	G
2	82618251	gUNC3434180	A	A	A	A	A	A	A	A	A	A	A	A	A	A	A	A	A	A	A	A	A	A	A	A	A	A	H	A	A	H	H	A	A	A	A	A	A	A	A	A	A	A	A	A	H	A	A
2	84247078	S3C023369883	G	G	G	G	G	G	G	G	G	G	G	G	G	G	G	G	G	G	G	G	G	G	G	G	G	G	H	H	H	H	H	G	G	G	G	G	G	G	G	G	G	G	G	G	H	G	G
2	98762810	gUNC3602909	H	G	H	G	G	G	G	G	G	G	G	G	G	G	G	G	G	H	H	G	G	G	G	G	G	G	G	G	G	G	G	G	G	G	H	G	H	G	G	G	G	G	G	G	G	G	G
2	98951727	S3C023958069	A	A	A	A	A	A	A	A	A	A	A	A	A	A	A	A	A	A	A	A	A	A	A	A	A	A	A	A	A	A	A	A	A	H	H	H	A	A	A	A	A	A	A	A	A	A	A
2	99562534	mJAX00497574	H	H	G	H	G	G	G	G	G	G	G	G	H	A	G	H	G	G	G	G	G	G	G	G	G	G	G	H	G	H	H	G	G	G	H	G	H	G	G	G	H	H	G	G	G	G	G
2	101375306	SS1024055012	G	G	G	G	G	G	G	H	G	G	H	G	G	G	G	G	H	H	H	H	H	G	H	A	G	A	A	H	A	H	H	G	G	G	G	G	G	G	H	A	G	G	H	A	H	H	H
2	105857253	S2R024234290	C	C	C	C	C	C	C	H	C	C	H	C	C	C	C	C	C	H	H	H	H	C	C	H	C	H	H	C	H	C	C	C	C	C	C	C	C	C	C	C	C	C	C	C	C	C	C
2	110080837	SAJ024403233	H	G	H	G	G	G	H	G	H	H	H	G	G	G	G	G	G	G	G	G	H	G	G	G	G	G	G	G	G	G	G	G	G	G	G	G	G	G	G	G	G	G	G	G	G	G	G
2	111114826	gJAX00499705	A	A	A	A	A	A	A	A	A	A	A	A	A	A	A	A	A	A	A	A	A	H	H	A	H	A	A	A	A	A	A	A	A	A	A	A	A	A	A	A	A	A	A	A	A	A	A
2	112076803	S3C024483072	A	A	A	A	A	A	A	A	A	A	A	A	A	A	A	A	A	A	A	A	A	H	H	A	H	A	A	A	A	A	A	A	A	A	A	A	A	A	A	A	A	A	A	A	A	A	A
2	113766485	S3C024550659	A	A	A	A	A	A	A	A	A	A	A	A	A	A	A	A	A	A	A	A	A	A	A	A	A	A	A	A	A	A	A	A	A	A	A	A	A	A	A	A	A	A	A	A	A	A	A
2	114358217	SAC024574328	G	G	G	G	G	G	G	G	G	G	G	G	G	G	G	G	G	G	G	G	H	G	G	G	G	G	H	G	G	H	H	G	G	H	G	H	G	H	G	G	G	G	G	G	H	G	G
2	115039159	S6H024601566	C	H	H	H	H	C	H	C	H	H	C	H	C	C	H	C	C	C	C	C	C	C	C	C	C	C	C	C	C	C	C	H	C	C	C	C	H	H	C	H	C	C	C	H	C	H	H
2	115770589	S6J024630823	C	H	H	H	H	C	H	C	H	H	C	H	C	C	H	C	C	C	C	C	C	C	C	C	C	C	C	C	C	C	C	H	C	C	C	C	H	H	C	H	C	C	C	H	C	H	H
2	127730977	S6T025109239	G	G	G	G	G	G	G	G	G	G	G	G	G	G	G	G	H	H	H	H	G	G	G	G	G	G	G	H	H	G	G	G	G	G	G	G	G	G	H	G	G	G	H	H	H	G	G
2	137615197	gUNC4055503	C	H	C	C	C	H	H	C	H	H	C	C	H	H	C	H	C	C	C	C	C	C	C	C	C	C	C	C	C	C	C	C	C	C	C	C	C	C	C	C	C	C	C	C	H	C	H
2	138480020	S6J025539200	H	C	T	H	C	C	C	H	C	C	H	H	H	C	H	H	C	H	H	H	T	C	C	H	C	H	H	C	H	C	C	H	C	H	H	T	C	T	H	T	T	H	H	H	C	H	C
2	146281182	SNJ025851247	G	G	G	G	G	G	G	G	G	G	G	H	H	G	H	H	G	G	G	G	G	G	G	G	G	G	H	G	G	H	H	G	G	G	G	G	G	G	G	G	G	G	G	G	H	G	H
2	148372097	SNJ025934883	C	C	C	C	C	C	C	C	C	C	C	C	C	C	C	C	C	C	C	C	C	C	C	C	C	C	C	C	C	H	H	C	C	C	C	C	C	C	C	C	C	C	C	C	H	C	H
2	157411772	S2T026296470	C	C	C	C	C	H	C	H	C	H	H	C	C	C	C	C	C	C	C	C	C	C	C	C	C	C	C	C	C	C	C	C	C	C	H	C	H	C	C	C	C	C	C	C	C	C	C
2	159884928	S6J026395397	A	G	H	H	G	G	G	G	G	G	G	G	G	H	G	H	H	G	G	G	G	G	H	H	H	H	H	H	H	H	H	G	G	G	G	G	G	G	H	H	G	H	G	H	H	A	A
2	160317512	SNJ026412700	C	C	C	C	H	C	H	C	C	H	H	H	H	C	H	C	C	C	C	C	H	C	C	H	H	C	C	C	C	C	C	C	C	C	C	C	C	C	C	C	C	C	C	C	C	C	C
2	160335911	S6J026413436	A	G	H	H	G	G	G	G	G	G	G	G	G	H	G	H	H	G	G	G	G	G	H	H	H	H	H	H	H	H	H	G	G	G	G	G	G	G	H	H	G	H	H	H	H	H	A
2	161888262	SFR026475530	C	C	C	C	C	C	C	C	C	C	C	C	C	C	C	C	C	C	C	C	C	C	C	C	C	C	C	C	C	C	C	C	C	C	C	C	C	C	C	C	H	C	C	C	C	H	C
2	166808040	gUNCHS007733	A	H	H	H	A	H	A	A	A	A	A	A	A	A	A	A	A	A	A	A	A	A	A	A	A	A	A	A	A	A	A	A	A	A	A	A	A	A	A	A	A	A	A	A	A	A	A
2	179281111	gUNC4580413	G	H	H	H	G	G	G	G	G	G	G	G	G	G	G	G	G	G	G	G	G	G	G	G	G	G	G	G	G	G	G	G	G	H	G	H	H	H	G	H	G	H	H	H	G	H	G
2	181161669	SNJ027246466	G	G	G	G	H	H	G	G	H	G	H	A	A	A	H	H	H	H	H	G	G	G	G	G	G	G	G	G	G	G	G	H	A	H	G	G	G	G	H	G	H	G	G	G	G	G	G
3	10891407	S2J030435656	C	C	C	C	H	H	C	H	H	C	H	C	C	C	C	C	H	C	H	C	C	C	C	C	C	C	C	C	C	C	C	C	C	H	H	C	H	H	H	H	C	H	C	H	C	C	C
3	15117705	gUNC4762747	C	C	C	C	H	H	C	H	H	C	H	C	C	C	C	C	C	C	C	C	C	C	C	C	C	C	C	C	C	C	C	C	C	C	C	C	C	C	H	H	C	H	C	H	C	C	C
3	15292002	S3C030611680	G	G	G	G	G	G	G	G	G	G	G	G	G	G	G	G	H	G	H	H	H	G	G	H	H	H	G	G	G	G	G	H	G	G	G	G	G	H	G	G	G	G	G	G	G	G	G
3	17831042	gUNC4791105	H	H	A	A	A	A	A	A	A	A	A	A	A	A	A	A	A	A	A	A	A	A	A	A	A	A	H	H	H	A	H	A	A	A	A	A	A	A	A	A	A	A	A	A	A	A	A
3	18267991	SAJ030730719	C	C	C	C	C	C	C	C	C	C	C	C	C	C	C	C	H	C	H	H	H	C	C	H	H	C	C	C	C	C	C	H	C	C	C	C	C	H	C	C	C	C	C	C	C	C	C
3	21312447	S6J030852497	H	G	H	H	G	G	A	G	G	A	H	H	G	G	H	H	G	H	G	G	H	H	G	G	H	G	G	G	G	G	G	G	G	G	G	H	G	H	H	H	G	G	H	H	G	G	G
3	22004518	S2T030880180	G	H	G	G	H	H	G	H	H	G	H	G	G	H	H	G	G	H	G	G	G	G	G	G	G	G	H	H	G	H	H	G	G	G	G	G	G	G	H	H	G	H	G	H	G	G	G
3	23031408	SS1030921256	T	T	T	T	T	T	T	T	T	T	T	T	T	T	T	T	T	T	T	T	T	T	T	T	T	T	T	T	T	T	T	H	T	T	T	T	T	H	T	T	T	T	T	T	T	H	H
3	28468788	SAJ031138751	G	G	G	G	G	G	G	G	G	G	G	G	G	G	G	G	G	G	G	G	G	G	G	G	G	G	H	H	H	H	H	H	H	G	G	G	G	G	G	G	G	G	G	G	G	G	G
3	31991151	SAJ031279646	G	G	G	G	G	G	G	G	G	G	G	G	G	G	G	G	G	G	G	G	G	G	G	G	G	G	G	G	G	G	G	G	G	G	G	G	G	G	G	H	G	H	G	H	G	G	G
3	37965169	SS1031518606	H	T	H	H	T	T	H	H	T	H	H	T	T	T	T	T	T	H	T	T	T	T	T	T	T	T	H	H	H	T	H	T	T	H	H	T	H	H	T	T	T	T	T	T	H	T	H
3	38144509	mUNC030404303	G	G	G	G	G	G	G	G	G	G	G	G	G	G	G	G	G	G	G	G	G	G	G	G	G	G	G	G	G	H	G	H	G	G	G	G	G	G	G	G	G	G	G	G	G	G	G
3	40142099	SNJ031605683	G	G	G	G	T	T	G	G	T	G	H	H	H	H	G	G	G	G	G	G	G	G	G	G	G	G	G	G	G	G	G	G	G	G	G	G	G	G	G	G	G	G	G	G	G	G	G
3	42418128	S6J031696725	C	C	C	C	C	C	C	C	C	C	C	C	C	C	C	C	H	H	C	C	C	C	C	C	C	C	C	C	C	H	C	C	C	C	C	C	C	C	C	C	C	C	C	C	C	C	C
3	54914906	S6J032196596	G	G	G	G	G	G	G	G	G	G	G	G	G	G	G	G	G	G	G	G	G	G	G	G	G	G	G	G	H	G	G	G	G	G	G	G	G	G	G	G	H	G	G	G	H	H	G
3	59240700	S2R032369628	T	T	T	T	H	H	T	T	H	T	T	T	T	T	T	T	H	T	T	H	T	H	H	T	T	H	H	H	H	T	H	T	T	H	H	H	H	T	T	T	T	T	T	T	H	H	T
3	60401505	ST2032416060	G	G	G	G	H	H	G	G	H	G	G	G	G	G	G	G	H	G	G	H	G	G	G	G	G	G	H	H	H	G	H	G	G	H	H	H	H	G	G	G	G	G	G	G	H	H	G
3	61226937	S6J032449077	A	A	A	A	A	A	A	A	A	A	A	A	A	A	A	A	A	H	H	A	H	H	A	A	A	A	A	A	A	A	A	A	A	A	A	A	A	A	A	A	A	A	A	A	H	H	H
3	62798722	UNC5389257	C	C	C	C	T	T	C	C	T	C	H	C	C	C	C	C	H	C	C	H	C	C	C	C	C	C	H	H	H	C	H	C	C	H	H	H	H	C	C	C	C	C	C	C	H	H	C
3	64292324	S6J032571692	C	C	C	C	C	C	C	C	C	C	C	C	C	C	C	C	C	H	H	C	H	H	C	C	C	C	C	C	C	C	C	C	C	C	C	C	C	C	C	C	C	C	C	C	C	C	H
3	68106354	DZO032724254	G	H	G	H	G	G	G	G	G	G	G	G	G	G	G	G	G	G	G	G	G	G	G	G	G	G	G	G	G	G	G	G	G	G	G	G	G	G	H	H	H	H	H	H	G	G	G
3	68814147	gUNCHS008973	C	C	C	C	C	C	C	C	C	C	C	C	C	C	C	C	C	H	H	C	H	H	C	C	C	C	C	C	C	C	C	C	C	C	C	C	C	C	C	C	C	C	C	C	C	C	H
3	69279129	UNC5464045	C	C	C	C	T	T	C	C	T	C	H	C	C	H	C	H	H	C	C	H	C	C	C	C	C	C	C	C	C	C	C	C	C	C	C	C	C	C	C	C	C	C	C	C	H	H	C
3	78307845	SAJ033132313	C	C	C	C	C	C	C	C	C	C	C	H	H	H	H	H	H	H	T	H	H	T	H	C	C	H	C	C	C	C	C	H	H	H	H	H	H	H	H	H	H	C	C	C	C	C	C
3	78894099	SS6033155763	G	G	G	G	H	H	G	H	H	H	G	G	G	H	G	H	G	G	G	G	G	G	G	G	G	G	G	G	G	G	G	G	G	G	G	G	G	G	G	G	G	G	G	G	H	H	G
3	79317471	gJAX00527593	G	G	G	G	G	G	G	G	G	G	G	G	G	G	G	G	G	G	G	G	G	G	G	G	G	G	H	H	H	H	H	G	G	G	G	G	G	G	G	G	G	G	G	G	H	H	G
3	81316003	SAJ033252640	G	G	G	G	G	G	G	G	G	G	G	H	H	H	H	H	A	A	H	H	H	A	A	G	G	H	G	G	G	G	G	H	H	H	H	H	H	H	H	H	H	G	G	G	G	G	G
3	89763013	gUNC5740658	G	H	G	H	G	G	G	G	G	G	G	G	G	G	G	G	G	G	G	G	G	G	G	G	G	G	H	H	H	G	H	G	G	G	G	G	G	G	G	G	G	G	G	G	G	H	H
3	90576094	JAX00529857	A	A	A	A	A	A	A	H	A	H	A	A	A	A	A	A	H	A	A	A	A	A	A	A	A	A	H	H	H	A	H	A	A	H	A	A	A	H	A	A	A	A	A	A	A	A	A
3	91863260	gJAX00529985	C	C	C	C	C	C	C	H	C	H	C	C	C	C	C	C	H	C	C	C	C	C	C	C	C	C	H	H	H	C	H	C	C	H	C	C	C	H	C	C	C	C	C	C	C	C	C
3	93155465	SAC033726218	G	H	G	H	G	G	G	G	G	G	G	G	G	G	G	G	G	G	G	G	G	G	G	G	G	G	G	G	G	G	G	G	G	G	G	G	G	G	G	G	G	G	G	G	G	H	H
3	95941154	UNC5787203	H	C	H	C	H	H	T	T	H	H	T	H	H	C	H	H	C	C	H	C	C	H	H	H	C	H	C	C	C	C	C	H	H	C	H	C	H	C	C	C	C	C	H	H	C	C	H
3	99967847	gJAX00531626	G	G	G	G	G	G	G	G	G	G	G	G	G	H	G	H	G	G	G	G	G	G	G	G	G	G	G	G	G	G	G	G	G	H	G	G	G	H	G	G	G	G	G	G	G	G	G
3	102681519	S6J034107260	C	C	C	C	C	C	C	C	C	C	C	C	C	C	C	C	C	C	C	C	C	C	C	C	C	C	C	C	C	C	C	C	C	C	C	C	C	C	C	C	C	C	C	C	C	C	C
3	103213011	S6J034128520	G	G	G	G	G	G	G	G	G	G	G	G	G	G	G	G	G	G	G	G	G	G	G	G	G	G	G	G	G	G	G	G	G	G	G	G	G	G	G	G	G	G	G	G	G	G	G
3	104434521	SSH034177380	H	G	H	G	H	H	H	G	H	G	H	H	H	G	H	G	G	G	G	G	H	G	G	G	G	G	G	G	G	G	G	G	G	G	G	G	G	G	G	G	G	G	H	H	G	G	G
3	105474591	S6J034218983	T	T	T	T	T	T	T	H	H	H	T	T	T	T	T	T	T	T	T	T	T	T	T	T	T	T	T	T	T	T	T	T	T	T	T	T	T	T	T	T	T	T	T	T	T	T	T
3	107581375	S6J034303255	C	C	C	C	C	C	C	H	H	H	C	C	C	C	C	C	C	C	C	C	C	C	C	C	C	C	C	C	C	C	C	C	C	C	C	C	C	C	C	H	H	H	C	C	C	C	C
3	113080942	SS1034523237	A	H	A	A	A	A	A	H	A	A	A	H	H	A	H	A	A	A	H	A	A	A	A	A	A	A	A	A	A	A	A	A	A	H	A	A	A	H	A	A	A	A	A	A	A	A	A
3	115839277	SAJ034633571	H	H	H	H	T	T	H	T	T	T	H	T	T	T	T	T	T	T	T	T	T	T	T	T	T	T	T	T	T	T	T	T	T	T	T	T	T	T	T	T	T	T	T	T	T	T	T
3	116208901	SS1034648356	T	H	T	T	T	T	T	G	H	H	T	H	H	T	H	T	T	T	H	T	T	T	T	T	T	T	H	H	H	T	H	T	T	H	T	T	T	H	T	T	T	T	T	T	T	T	T
3	116932415	UNC6038671	H	H	H	H	H	H	H	T	T	T	H	T	T	T	T	T	T	T	T	H	H	T	T	T	H	T	T	T	T	T	T	T	T	T	T	T	T	T	T	T	T	T	T	T	T	T	T
3	117862493	gJAX00112248	H	H	H	H	H	H	H	C	C	C	H	C	C	C	C	C	C	C	C	C	C	C	C	C	C	C	C	C	C	C	C	C	C	H	C	C	C	H	C	C	C	C	C	C	C	C	C
3	120666881	B6_03-120369799-S	C	C	C	C	C	C	C	C	C	C	C	C	C	C	C	C	C	C	C	C	C	C	C	C	C	C	C	C	C	C	C	C	C	H	C	C	C	H	C	C	C	C	C	C	C	C	C
3	121828392	UNC030194728	T	T	T	T	T	T	T	T	T	T	T	T	T	T	T	T	T	T	T	T	T	T	T	T	T	T	T	T	T	T	T	T	T	T	T	T	T	T	T	T	T	T	T	T	T	T	T
3	125598333	gUNC6167562	T	T	T	T	T	T	T	T	T	T	T	H	H	T	T	T	T	T	T	T	T	H	H	H	T	H	T	T	T	T	T	T	T	T	T	T	T	T	H	T	T	T	T	T	T	T	T
3	128988164	JAX00537340	H	H	H	H	G	G	G	G	G	G	G	G	G	G	G	G	G	G	G	G	G	G	G	G	G	G	G	G	G	G	G	G	G	H	G	G	G	H	G	G	G	G	G	G	G	G	G
3	129182102	JAX00537378	H	H	H	H	A	A	A	A	A	A	A	A	A	A	A	A	A	A	A	A	A	A	A	A	A	A	A	A	A	A	A	A	A	A	A	A	A	A	A	A	A	A	A	A	A	A	A
3	131202968	SSR035248118	G	G	G	G	G	G	G	H	G	H	G	G	G	G	G	G	H	G	G	G	G	G	G	G	G	G	G	G	G	G	G	G	G	G	G	G	G	G	G	G	G	G	G	G	H	H	H
3	133137206	S6J035325488	G	G	G	G	H	H	G	G	G	G	G	G	G	G	G	G	G	G	G	G	G	G	G	G	G	G	G	G	G	G	G	G	G	G	G	G	G	G	H	H	H	H	H	H	H	G	H
3	134478458	gJAX00113489	C	C	C	C	C	C	C	C	C	C	C	C	C	H	H	H	C	C	C	C	H	C	C	C	C	C	C	C	C	C	C	C	C	C	C	C	C	C	C	C	C	C	C	C	H	H	H
3	140315565	gJAX00539599	T	T	T	T	T	T	T	T	T	T	T	T	T	H	H	H	T	T	T	T	T	T	T	T	T	T	T	T	T	T	T	T	T	T	T	T	T	T	T	T	T	T	T	T	H	H	H
3	140848129	mUNC6391970	T	T	T	T	T	T	T	T	T	T	T	T	T	T	T	T	T	T	T	T	T	T	T	T	T	T	T	T	T	T	T	H	T	T	T	T	T	T	T	T	T	T	T	T	T	T	T
3	146317041	S6J035852681	C	C	C	C	C	C	C	H	C	C	C	C	C	C	C	C	C	C	C	C	C	C	C	C	C	C	C	C	C	C	C	C	C	C	C	C	C	C	C	C	C	C	C	C	C	H	C
3	148193409	gUNC6501366	A	A	A	A	A	A	A	A	H	H	H	A	A	A	A	A	A	A	H	A	A	A	H	H	A	A	A	A	A	A	A	A	A	A	A	A	A	A	A	A	A	A	A	A	A	A	A
3	149692043	gJAX00541998	A	A	A	A	A	A	A	H	A	A	A	A	A	A	A	A	H	H	A	H	H	H	A	A	H	H	A	A	A	A	A	A	A	A	A	A	A	A	H	A	A	A	A	A	A	A	A
3	149769775	SS1035990791	G	G	G	G	G	G	G	G	G	G	G	H	H	G	H	H	G	G	G	G	G	G	G	G	G	G	H	G	H	H	G	H	G	G	G	G	G	G	G	G	G	G	G	G	G	G	G
3	151992435	SNJ036079697	C	H	C	C	C	C	C	C	C	C	C	C	C	C	C	C	C	C	C	H	H	C	C	C	C	C	C	C	C	C	C	C	C	C	C	C	H	C	C	C	C	C	C	C	C	C	C
3	153025231	S3N036121009	G	G	G	G	H	H	G	G	G	G	G	G	G	A	H	H	G	G	G	G	G	G	G	G	G	G	G	G	G	G	G	G	H	H	H	H	G	H	G	G	G	G	G	G	G	H	G
3	154127358	gUNC6581568	H	H	H	H	G	G	G	G	H	H	H	G	G	G	G	G	G	G	G	G	G	G	G	G	G	G	G	G	G	G	G	H	G	G	G	G	H	G	G	G	G	G	G	G	G	G	G
3	159614157	SS1036384566	H	H	H	H	C	C	C	C	C	C	C	C	C	C	C	C	C	C	C	C	C	C	C	C	C	C	C	C	C	C	C	H	C	C	C	C	H	C	C	C	C	C	C	C	C	C	C
4	7146585	SAJ040285863	C	C	C	C	H	H	C	C	C	C	C	H	C	C	H	C	C	C	C	C	C	H	C	H	C	C	C	C	C	C	C	C	H	C	C	C	C	C	C	C	C	C	C	C	H	H	C
4	7969886	gUNC6687508	T	H	H	H	T	T	T	H	T	T	H	T	H	T	T	H	T	H	T	T	T	T	T	T	T	T	T	H	H	H	T	G	T	H	H	H	H	H	T	T	T	T	T	T	T	T	T
4	11352296	gJAX00545177	C	H	H	H	C	C	C	C	C	C	H	C	H	C	C	H	C	C	C	C	C	C	C	C	C	C	C	H	H	H	C	H	C	C	C	C	C	C	C	C	C	C	C	C	C	C	C
4	13809236	SBC040552369	A	H	H	H	A	A	A	A	A	A	H	A	H	A	A	H	A	A	A	A	A	A	A	A	A	A	A	H	H	H	A	A	A	A	A	A	A	A	A	A	A	A	A	A	A	A	H
4	25559451	S2H041022378	G	H	H	H	H	H	H	H	H	H	H	H	G	H	H	G	G	H	H	G	G	H	H	H	H	G	G	G	G	G	G	G	G	G	G	G	G	G	G	G	G	G	G	G	G	G	G
4	25948116	mJAX00547070	A	A	A	A	A	A	H	H	A	A	A	A	H	A	A	H	A	A	A	A	A	A	A	A	A	A	A	H	H	H	A	H	A	A	H	H	A	A	A	A	H	H	H	H	H	H	A
4	27442883	gJAX00547226	A	A	A	A	A	A	H	H	A	A	A	A	H	A	A	H	A	A	A	A	A	A	A	A	A	A	A	H	H	H	A	H	A	A	H	H	A	A	A	A	H	H	H	H	H	H	A
4	35817670	ST2041432706	C	C	C	C	C	C	C	C	C	C	C	C	C	C	C	C	C	H	H	C	C	H	H	H	H	C	C	C	C	C	C	C	H	H	C	C	H	H	H	H	H	C	C	C	C	C	C
4	36548543	gJAX00548393	A	H	H	H	G	H	A	A	A	A	A	H	H	H	H	H	A	A	A	H	H	A	A	A	A	A	A	A	A	A	A	A	A	A	A	A	A	A	A	A	A	A	A	A	A	A	A
4	49475732	SNJ041979029	G	G	G	G	G	G	G	G	G	G	G	G	G	G	G	G	G	G	G	G	G	G	G	G	G	G	G	G	G	G	G	G	G	G	G	G	G	G	G	G	G	G	G	G	G	G	G
4	50664652	SNJ042026586	C	C	C	C	C	C	C	C	C	C	C	C	C	C	C	C	C	C	C	C	C	C	C	C	C	C	C	C	C	C	C	C	C	C	C	C	C	C	C	C	C	C	C	C	C	C	C
4	50764722	SS1042030588	G	G	G	G	G	G	G	G	G	G	G	G	G	G	G	G	G	G	G	H	H	G	G	G	G	G	G	G	G	G	G	G	G	G	G	G	G	G	G	G	G	G	G	G	G	G	G
4	52567125	gJAX00550942q	C	A	H	A	C	C	C	C	H	H	C	C	H	H	H	H	H	H	H	C	C	C	C	C	C	C	A	H	H	H	A	H	C	C	H	H	C	H	C	C	C	C	C	C	C	C	H
4	53694441	S6J042147777	G	G	G	G	G	G	G	G	G	G	G	G	H	G	H	H	G	G	G	H	H	G	G	G	G	G	G	G	G	G	G	G	G	G	G	G	G	G	G	G	G	G	G	G	G	G	G
4	57669827	SNJ042306793	C	C	C	C	C	C	C	C	C	C	C	C	C	C	C	C	C	C	C	C	C	C	C	C	C	C	C	C	C	C	C	C	C	C	H	H	H	C	C	C	C	C	C	C	H	H	C
4	62863459	SAJ042514538	H	H	C	C	C	H	H	H	H	H	H	H	C	H	C	C	T	T	H	C	C	H	H	H	C	H	H	H	H	H	H	H	H	H	H	H	H	H	C	C	C	C	C	C	C	C	C
4	63255088	S6Y042530203	H	H	G	G	G	G	G	G	G	G	G	G	G	G	G	G	G	G	G	H	H	H	H	H	H	H	H	G	H	G	H	G	H	A	G	G	G	A	G	G	G	G	G	G	G	G	G
4	66317644	SS1042652705	T	T	T	T	T	T	H	H	H	H	T	T	T	T	T	T	H	T	H	T	T	T	T	T	T	T	T	T	T	T	T	T	T	T	T	T	T	T	H	H	H	T	T	T	T	T	T
4	66379904	S6J042655196	H	H	G	G	G	G	G	G	G	G	G	G	G	G	G	G	G	G	G	H	H	H	H	H	H	H	H	G	H	G	H	G	H	A	G	G	G	A	G	G	G	G	G	G	G	G	G
4	68016529	gJAX00120036	A	A	A	A	A	A	H	H	H	H	A	A	A	A	A	A	H	A	H	A	A	A	A	A	A	A	A	A	A	A	A	A	A	A	A	A	A	A	H	H	H	A	A	A	A	A	A
4	70186770	ST2042807470	G	G	G	G	G	G	A	H	H	A	H	G	G	G	G	G	H	G	H	H	H	G	G	G	G	G	G	G	G	G	G	H	G	G	A	A	A	G	H	G	G	G	G	G	H	G	G
4	73602269	gJAX00120452	G	G	G	G	G	G	G	G	G	G	H	G	H	H	G	H	G	H	G	G	G	G	G	G	G	G	H	H	H	H	H	A	H	G	A	A	A	G	G	G	H	G	G	H	G	G	G
4	75594996	SS1043023799	C	C	C	C	C	C	H	H	H	H	C	C	C	C	C	C	C	C	C	H	H	C	C	C	C	C	C	C	C	C	C	C	C	C	C	C	C	C	H	C	C	C	C	C	H	C	C
4	77971090	SS1043118843	C	C	C	C	C	C	H	H	H	H	C	C	C	C	C	C	C	C	C	H	H	H	H	H	C	C	C	C	C	C	C	C	C	C	C	C	C	C	H	C	C	C	C	C	H	C	C
4	83021024	S2J043320840	G	G	G	G	H	H	H	G	G	H	G	G	G	G	G	G	G	G	H	G	H	H	H	H	H	G	H	H	H	H	H	H	H	G	G	G	G	G	H	H	G	H	H	G	G	H	H
4	83439314	S6J043337572	G	G	G	G	H	G	G	G	G	G	G	G	G	G	G	G	G	G	G	G	G	G	G	G	G	G	G	G	G	G	G	G	H	H	G	G	G	H	G	G	G	G	G	G	G	G	G
4	84225321	SFT043369012	C	C	C	C	C	C	C	C	C	C	C	C	C	C	C	C	H	H	C	H	C	C	C	C	C	H	C	C	C	C	C	C	C	H	C	C	C	H	C	C	C	H	H	H	C	C	C
4	85910730	S6J043436429	C	C	C	C	C	C	C	C	C	C	C	C	C	C	C	C	C	C	C	C	C	C	C	C	H	H	C	C	C	C	C	C	H	C	C	C	C	C	C	C	C	C	C	C	C	C	C
4	88222686	DZO043528907	T	H	T	H	T	H	H	C	C	H	H	C	T	H	H	T	T	T	H	T	H	H	H	H	H	T	T	T	T	T	T	T	T	H	H	H	H	H	T	H	H	T	T	T	H	T	T
4	91225856	SS1043649034	A	A	A	A	A	A	A	A	A	A	A	A	A	A	A	A	A	A	A	A	A	A	A	A	A	A	A	A	A	A	A	A	A	A	A	A	A	A	H	A	A	A	A	A	A	A	A
4	91345828	B10040091345	G	G	G	G	G	G	G	G	G	G	G	G	H	H	G	H	G	G	G	G	G	G	G	G	G	G	G	G	G	G	G	H	G	G	H	H	H	G	G	G	G	G	G	G	G	G	G
4	96135945	gJAX00122133	H	A	H	A	A	A	H	A	A	H	A	A	A	A	A	A	H	H	A	H	A	H	H	H	A	H	A	A	A	A	A	A	A	H	A	A	A	H	A	A	A	A	A	A	A	A	A
4	97727625	S6J043909105	T	T	T	T	T	T	T	T	T	T	T	H	T	T	H	T	T	T	T	T	T	T	T	T	T	T	H	H	T	H	H	T	T	H	T	H	T	H	T	T	H	T	T	H	T	T	T
4	97813299	SS1043912531	T	T	T	T	T	T	T	T	T	T	T	T	T	T	T	T	T	T	T	T	T	T	T	T	T	T	T	T	T	T	T	T	T	T	T	T	T	T	T	T	T	T	T	T	T	T	T
4	100009609	SS1044000384	A	A	A	A	A	A	A	A	A	A	A	A	A	A	A	A	A	A	A	A	A	A	A	A	A	A	A	A	A	A	A	H	H	A	A	A	A	A	A	A	A	A	A	A	A	A	A
4	107161181	JAX00561321	H	C	H	C	C	C	C	C	C	C	H	H	C	C	H	C	C	C	C	H	H	C	C	C	C	C	H	H	C	H	H	C	C	C	C	C	C	C	C	H	A	C	H	H	C	C	C
4	112657372	gUNC7985769	G	G	G	G	G	G	G	G	G	G	G	G	G	G	G	G	G	G	G	G	G	G	G	G	G	G	H	H	G	G	G	H	H	G	H	G	H	G	G	H	H	G	H	G	G	G	G
4	122873744	B10040122873	A	H	H	A	A	A	H	H	H	H	A	A	H	A	H	H	A	H	A	A	A	A	A	A	A	A	A	A	A	A	A	A	A	A	A	A	A	A	H	A	A	H	A	H	H	H	H
4	126544146	B10040126544	H	A	A	H	A	A	A	A	A	A	H	A	H	A	H	H	A	A	A	A	A	A	A	A	A	A	H	H	A	A	A	G	G	H	H	H	H	H	H	H	A	H	H	A	H	H	H
4	127913207	S2H045116528	H	A	H	A	A	A	A	A	A	A	A	H	A	H	A	A	A	A	A	A	A	A	A	A	A	A	A	A	A	A	A	A	A	H	A	A	A	H	A	A	A	A	A	A	A	A	A
4	127975875	SNJ045119035	C	C	C	C	C	C	C	C	C	C	C	C	C	C	C	C	C	C	C	C	C	C	H	H	C	H	C	C	C	C	C	C	C	C	C	C	C	C	C	C	C	C	C	C	C	C	C
4	128085137	SNJ045123405	G	G	G	G	G	G	G	G	G	G	G	G	G	G	G	G	G	G	G	G	G	G	H	H	G	H	H	H	G	G	G	H	H	G	H	G	H	G	G	G	G	G	G	G	G	G	G
4	129623415	gJAX00124567	C	H	C	H	C	C	C	C	C	C	C	C	C	C	C	C	T	H	H	C	C	H	C	C	C	H	C	C	H	C	C	H	C	C	C	C	C	C	C	H	C	H	H	C	T	T	T
4	131512524	gJAX00566668	C	C	C	C	C	C	C	C	C	C	C	C	C	C	C	C	C	C	H	C	C	C	C	C	C	C	C	C	C	C	C	H	C	C	C	C	C	C	C	C	C	C	C	C	C	C	C
4	131602449	SS1045264097	G	G	G	G	H	G	H	H	H	H	G	H	G	G	H	H	G	G	G	H	H	G	G	G	G	G	G	G	G	G	G	G	G	G	H	H	H	G	G	H	H	G	H	G	G	G	G
4	135393814	B10040135393	H	G	G	H	G	H	G	G	G	G	H	G	G	G	G	G	H	H	H	A	A	G	G	G	G	G	H	H	G	H	H	G	G	G	H	H	H	G	G	G	H	G	G	H	A	A	A
4	138116182	SSH045524647	C	C	C	C	C	C	C	C	C	C	C	H	C	C	H	H	C	C	C	H	H	C	C	C	C	C	C	C	C	C	C	C	C	C	C	C	C	C	C	H	C	H	C	C	C	C	C
4	138495693	gUNC8328711	C	H	H	C	C	C	C	C	C	C	C	C	C	C	C	C	C	C	C	C	C	H	C	C	C	H	C	C	C	C	C	C	C	C	C	C	C	C	C	C	C	C	C	C	C	C	C
4	140059764	SS1045602390	A	A	A	A	A	A	A	A	A	H	H	H	H	G	A	A	H	H	A	A	A	A	H	H	H	H	A	A	H	H	H	H	A	H	A	H	A	H	H	A	A	H	A	H	A	A	A
4	142089253	SSH045683570	C	C	C	C	H	C	C	C	H	H	H	C	C	C	C	C	H	H	C	C	C	C	H	H	H	H	C	C	H	H	H	H	C	C	C	C	C	C	C	C	H	C	H	H	C	C	C
4	148381090	SS1045935243	G	G	G	G	G	G	G	G	G	G	G	G	G	G	H	H	H	H	H	G	G	G	G	G	G	G	G	G	G	G	G	H	G	G	H	H	H	G	G	G	H	G	H	H	G	G	G
4	148661822	S6J045946472	T	C	H	H	C	H	H	C	H	C	C	H	C	C	C	H	C	C	H	C	C	C	C	C	C	C	C	C	C	C	C	C	H	C	C	C	C	C	C	H	H	C	H	C	H	H	H
4	151467715	SAJ046058708	C	C	C	C	H	C	C	C	C	C	C	H	C	C	C	H	C	C	C	C	C	C	C	C	C	C	C	C	H	H	H	C	C	C	C	C	C	C	H	H	C	H	C	C	C	C	C
4	155422748	SS1046216909	G	H	G	H	G	G	G	G	G	G	G	G	G	G	G	G	G	G	G	G	G	G	G	G	G	G	G	G	G	G	G	G	G	G	G	G	G	G	G	H	G	G	H	H	G	G	G
4	155905557	S6T046236222	H	G	G	H	G	G	G	G	G	G	G	A	H	H	H	H	G	G	G	G	G	G	G	G	G	G	G	G	H	H	H	G	H	G	H	G	H	G	G	G	G	G	G	G	H	H	G
5	6184027	gJAX00572911	T	T	T	T	T	T	T	T	T	T	T	T	T	T	T	T	H	H	H	T	T	T	T	T	T	T	T	T	T	T	T	T	T	T	T	T	T	T	T	T	T	T	T	T	T	T	T
5	9385197	SAJ050375407	A	A	A	A	A	A	A	A	A	A	A	A	A	A	A	A	A	A	A	A	A	A	A	A	A	A	H	A	H	A	A	A	H	A	A	A	A	A	A	A	A	A	A	A	H	H	A
5	10316558	gJAX00573805	H	H	H	H	H	H	G	H	A	H	H	A	A	A	A	A	A	A	A	A	A	H	A	H	H	A	A	H	H	H	H	G	A	H	H	H	A	A	A	A	A	A	A	A	A	A	A
5	14541253	DS1044922269	G	H	H	G	G	G	H	H	H	H	G	G	H	G	H	H	G	H	G	G	G	G	G	G	G	G	G	G	G	G	G	G	G	G	G	G	G	G	H	G	G	H	G	H	H	H	H
5	17127695	S6J050685107	C	C	C	C	H	H	C	C	C	C	C	H	H	H	H	H	H	C	C	T	T	T	T	H	T	T	C	C	C	C	C	C	C	C	H	H	H	H	T	H	H	H	H	H	C	C	C
5	22985309	DZO050919412	C	C	H	C	C	C	C	C	C	C	C	H	H	H	H	H	H	C	C	H	C	H	C	H	H	C	C	C	C	C	C	C	H	C	C	C	C	C	C	C	C	C	C	C	H	H	H
5	25369451	gUNC8825065	C	C	C	C	H	H	H	H	H	H	H	C	C	C	C	C	H	H	H	C	H	C	C	C	C	C	H	H	C	H	H	C	H	C	C	C	C	C	C	C	C	C	C	C	T	T	H
5	29470130	S1J051178805	G	G	G	G	G	G	H	H	G	H	G	G	G	G	G	G	G	G	G	G	G	G	G	H	G	G	G	H	G	H	H	G	G	G	H	H	G	H	H	H	G	G	G	G	G	G	H
5	29678575	SAH051187143	A	A	A	A	A	A	A	A	A	A	A	A	A	A	A	A	A	A	A	A	H	A	A	A	A	A	A	A	A	A	A	A	A	A	A	A	A	A	A	A	A	A	A	A	H	A	H
5	40569105	gUNC9020575	G	H	H	H	G	G	G	G	G	G	G	G	G	G	G	G	G	G	G	G	G	G	G	G	G	G	G	G	G	G	G	G	G	G	G	G	G	G	G	G	G	G	G	G	G	G	G
5	48261376	gJAX00581373	H	H	G	H	G	H	G	G	G	G	G	G	G	G	G	G	G	G	G	G	G	G	G	G	G	G	G	H	G	G	H	H	G	G	H	G	G	G	G	G	G	H	G	G	A	H	H
5	51864151	S6J052074566	H	G	G	G	G	G	G	G	G	G	G	H	G	G	G	G	G	G	G	G	G	G	G	G	H	G	G	G	G	G	G	H	H	H	H	H	H	H	H	H	G	G	G	G	G	G	G
5	53940168	gJAX00582803	C	C	C	C	C	C	C	C	C	C	C	C	C	C	C	C	C	C	C	C	C	C	C	C	C	C	C	C	C	C	C	H	C	H	C	C	H	C	C	C	C	C	C	C	C	C	C
5	54410753	S6J052176430	G	G	G	G	G	G	G	G	G	G	G	G	G	G	G	G	G	G	G	G	H	G	G	G	G	G	H	A	H	H	A	G	G	G	G	G	G	G	G	H	H	H	H	H	G	G	H
5	55976269	SBC052239050	G	H	A	H	G	G	G	G	G	G	G	G	G	G	G	G	H	H	H	H	G	H	H	H	H	H	G	G	G	G	G	G	G	G	G	G	G	G	G	G	G	G	G	G	A	H	H
5	64813938	SS6052592557	T	T	T	T	H	T	H	H	T	H	C	T	T	T	T	T	T	T	T	T	T	T	T	T	T	T	T	T	T	T	T	T	T	T	T	T	T	T	T	T	T	T	T	T	C	H	H
5	64853791	SNJ052594151	C	H	H	H	H	H	C	C	C	C	C	H	C	C	C	C	C	A	H	C	A	C	C	C	H	H	C	C	C	C	C	H	H	H	H	H	H	H	C	C	C	H	C	C	C	H	C
5	69546157	gUNC9410407	A	A	A	A	H	H	H	A	A	A	H	H	A	A	A	A	A	A	A	A	A	A	A	A	A	A	A	A	A	A	A	A	A	A	H	A	A	H	A	A	A	A	A	A	A	A	A
5	71767147	S3H052870685	C	C	C	C	H	H	H	C	C	C	H	H	C	C	C	C	C	C	C	C	C	C	C	C	C	C	C	C	C	C	C	C	C	C	C	C	C	C	C	C	C	C	C	C	C	C	C
5	76783431	gJAX00131867	G	A	A	A	H	H	H	G	G	G	G	G	G	G	G	G	G	G	G	G	G	G	G	G	G	G	H	H	H	H	G	G	G	G	G	G	G	G	G	G	G	G	G	G	G	G	G
5	76876775	SFH053075071	A	G	G	G	H	H	H	A	A	A	A	A	A	A	A	A	A	A	A	A	A	A	A	A	A	A	H	H	H	H	A	A	A	A	A	A	A	A	A	A	A	A	A	A	A	A	A
5	85300721	mJAX00587681	G	G	G	G	G	G	G	G	G	G	G	G	G	G	G	G	G	H	H	G	H	G	G	G	G	G	G	G	G	G	G	G	G	H	G	H	H	G	G	G	G	G	G	G	G	G	G
5	90682065	S6N053627282	H	C	C	C	C	C	H	C	H	C	C	H	C	C	C	C	H	C	C	T	C	H	T	T	C	H	H	H	H	H	H	H	H	C	C	C	C	C	C	C	C	C	C	C	H	C	H
5	90971154	SS1053638846	A	A	A	A	A	A	A	A	A	A	A	A	A	A	A	A	A	A	A	A	A	A	A	A	A	A	H	H	H	H	H	A	A	A	A	A	A	A	A	A	A	A	A	A	A	A	A
5	93050760	gJAX00588898	H	H	H	H	C	C	C	C	C	C	C	C	C	C	C	C	C	H	C	C	C	H	C	C	H	H	C	C	C	C	C	C	C	C	H	C	C	H	C	C	C	H	C	H	C	H	C
5	96717127	SBH053868685	G	G	G	G	G	G	G	G	G	G	G	G	G	G	G	G	G	G	G	G	G	G	G	G	G	G	G	G	G	G	G	H	H	G	G	G	G	G	G	G	G	G	G	G	G	G	G
5	99684990	D6J053987399	G	H	H	H	G	G	G	G	G	G	G	H	H	H	G	H	G	G	G	G	H	G	G	G	H	G	G	G	G	G	G	G	G	G	G	G	G	G	G	G	G	G	G	G	G	G	G
5	106312509	SAH054252500	G	G	G	G	G	G	G	G	G	G	G	H	G	G	H	G	G	G	G	G	G	H	G	G	H	H	G	G	G	G	G	G	G	G	G	G	G	G	G	G	G	G	G	G	G	G	G
5	106882122	gUNC9867296	G	G	G	G	H	H	G	G	G	G	G	G	G	G	G	G	H	G	H	G	G	G	G	G	G	G	G	G	G	G	G	G	G	H	A	H	H	A	G	G	G	H	G	H	G	G	G
5	110854401	SAC054434176	C	C	C	C	C	C	C	C	C	C	C	H	C	C	H	C	C	C	C	C	C	C	C	C	C	C	C	C	C	C	C	C	C	C	C	C	C	C	C	C	C	C	C	C	C	C	C
5	110977420	SNJ054439096	C	C	C	C	C	C	C	C	C	C	C	H	C	C	C	C	C	C	C	C	C	C	C	C	C	C	C	C	C	C	C	H	H	C	C	C	C	C	C	C	C	C	C	C	H	H	C
5	112252967	SS1054490118	G	G	G	G	G	G	G	G	G	G	G	G	G	G	G	G	G	G	G	G	G	G	G	G	G	G	G	G	G	G	G	G	G	G	G	G	G	G	G	G	G	G	G	G	G	G	G
5	113269789	SAJ054530791	A	G	G	G	G	G	G	G	G	G	G	H	H	H	H	H	G	G	G	G	G	G	G	G	G	G	G	G	G	G	G	G	G	H	H	H	H	H	G	G	G	G	G	G	G	G	G
5	115975702	SS1054639028	H	A	H	A	A	A	H	A	A	A	A	A	A	A	A	A	A	A	A	A	A	A	A	A	A	A	A	A	A	A	A	A	A	A	A	A	A	H	A	A	A	H	A	H	A	A	A
5	116500493	SFT054660019	T	C	H	C	T	T	H	T	H	T	H	H	H	H	H	H	T	T	T	T	H	H	H	H	H	H	T	T	T	T	T	H	H	T	T	T	T	T	C	H	H	T	H	T	T	T	T
5	131541036	mbackupUNC050223582	G	G	G	G	H	H	H	H	G	H	G	G	G	G	G	G	G	G	G	G	G	G	G	G	G	G	H	H	H	H	G	G	H	G	H	H	H	G	G	G	G	H	G	G	H	H	G
5	142082913	gJAX00599865	H	H	H	H	H	G	A	A	A	A	A	A	A	A	A	A	H	A	H	A	H	H	H	H	A	H	G	G	H	G	H	A	H	A	H	H	H	H	H	H	H	A	A	A	H	H	H
6	13140760	SAC060525630	H	C	C	C	C	H	H	C	C	C	C	C	C	C	C	C	A	A	H	C	H	C	C	H	H	H	C	H	H	C	H	C	H	H	H	H	H	H	C	C	C	C	C	C	C	C	C
6	16794202	SNJ060671768	C	C	C	C	C	C	C	C	C	C	C	H	H	C	C	H	C	C	H	H	H	H	T	C	C	H	C	C	C	C	C	C	C	C	C	C	C	C	C	C	C	C	C	C	C	C	C
6	21657089	B10060021657	G	G	G	G	G	G	G	H	H	H	H	G	G	G	G	G	G	G	G	G	G	G	G	G	G	G	G	G	G	G	G	G	G	G	G	G	G	G	H	G	H	H	G	H	A	H	H
6	21735017	gJAX00604688	A	A	A	A	A	A	A	H	H	H	H	A	A	A	A	A	A	A	A	A	A	A	A	A	A	A	A	A	A	A	A	A	A	A	A	A	A	A	H	A	H	H	A	H	G	H	H
6	23398150	gUNC10725330	H	G	G	G	G	G	G	G	G	G	G	H	H	H	G	H	G	G	G	G	G	G	G	G	G	G	G	H	A	H	H	G	G	G	G	G	G	G	G	G	G	G	G	G	G	G	G
6	38972378	gJAX00139986	T	H	H	H	T	T	T	T	T	T	T	T	T	T	T	T	T	T	T	T	T	T	T	T	T	T	T	T	T	T	T	T	T	T	T	T	T	T	H	T	T	T	T	T	T	T	T
6	39692388	gUNC10924341	H	H	C	H	C	C	H	C	C	C	C	C	C	C	H	C	C	C	C	C	C	H	C	H	C	C	C	C	C	C	C	C	C	C	C	C	C	C	C	C	C	C	C	C	C	C	C
6	40079338	B6_rs30314218	C	C	H	C	H	H	C	C	C	C	C	H	H	H	C	H	C	C	H	H	H	H	H	C	H	H	C	C	C	C	C	C	H	H	C	C	C	C	C	A	H	A	A	H	C	H	H
6	40379662	gUNCHS017095	A	H	H	H	A	A	A	A	A	A	A	A	A	A	A	A	A	A	A	A	A	A	A	A	A	A	A	A	A	A	A	A	A	A	A	A	A	A	H	A	A	A	A	A	A	A	A
6	48736670	gJAX00609189	G	G	G	G	G	G	A	H	H	G	G	G	G	G	G	G	G	G	G	G	H	G	H	G	H	H	G	G	G	G	G	G	G	G	G	G	G	G	G	H	H	G	H	H	H	G	G
6	50140560	S6J062005622	G	G	H	G	H	H	G	G	G	G	G	H	H	H	H	H	G	G	H	H	G	A	G	H	G	G	H	H	H	G	H	G	G	H	G	G	G	G	H	G	G	G	G	G	G	G	G
6	53311746	gUNCHS017378	T	T	H	T	H	H	T	T	T	H	H	H	H	H	H	H	T	T	H	H	T	H	T	T	T	T	T	T	T	T	T	H	H	H	H	H	H	H	T	T	T	H	T	T	H	T	T
6	54316675	SNJ062172667	C	C	H	C	H	C	H	C	C	C	H	C	C	C	C	C	C	H	C	C	H	C	H	C	H	H	C	C	C	C	C	C	C	C	C	C	C	C	H	C	H	H	C	H	C	C	C
6	60919553	gJAX00611543	T	T	T	T	T	T	T	T	T	T	T	T	T	T	T	T	T	T	T	H	T	T	T	T	T	T	T	T	T	T	T	T	T	T	T	T	T	T	T	T	T	T	T	T	H	T	T
6	61492733	S6J062459709	C	C	C	C	H	H	C	H	H	H	C	C	C	C	C	C	C	C	C	C	C	C	C	C	C	C	C	C	C	C	C	H	H	H	H	H	H	H	C	C	C	C	C	C	C	C	C
6	61705972	SNJ062468238	H	G	H	G	G	G	H	G	G	G	H	G	G	G	G	G	G	H	G	G	H	G	A	A	A	A	G	G	G	G	G	G	G	G	G	G	G	G	H	H	A	A	H	A	G	G	G
6	65006119	S3C062600244	H	H	T	H	H	H	T	T	T	T	T	H	H	H	T	H	H	H	H	H	H	C	T	T	T	T	T	H	H	T	T	T	H	T	H	T	H	H	T	H	T	T	H	T	T	T	T
6	71592185	gJAX00613222	H	H	G	H	A	H	H	G	G	G	H	H	H	H	G	H	H	H	H	H	H	A	G	G	G	G	G	H	H	G	G	G	G	G	H	G	H	H	G	G	G	G	G	G	H	G	G
6	73143109	SBC062925724	H	H	C	H	T	H	H	C	C	C	H	H	H	H	C	H	H	H	H	H	H	T	C	C	C	C	C	C	C	C	C	C	C	C	H	C	H	H	C	C	C	C	C	C	H	C	C
6	77047913	SAH063081916	G	G	G	G	G	G	G	G	G	G	G	G	G	G	H	G	G	G	G	G	H	G	H	H	H	H	H	H	H	H	H	G	H	H	H	H	H	H	G	H	G	G	H	G	H	H	H
6	82748779	gJAX00615860	H	H	H	H	C	C	C	C	C	C	C	C	C	C	C	C	C	C	C	C	C	C	C	C	C	C	H	C	C	H	H	H	H	H	H	H	H	H	C	C	C	C	C	C	C	H	H
6	88340892	SS1063533635	C	C	C	C	C	C	C	C	C	C	C	C	C	C	C	C	C	C	C	C	C	C	C	C	C	C	C	C	C	C	C	H	H	H	C	H	C	C	C	C	C	C	C	C	C	C	C
6	89558471	gUNC11567769	G	G	G	G	G	G	G	G	G	G	G	G	G	G	G	G	G	G	G	G	G	G	G	G	G	G	G	G	G	G	G	H	G	G	G	G	G	G	G	G	G	G	G	G	G	G	G
6	90739448	DZO063629577	A	A	A	A	A	A	A	A	A	A	A	H	H	H	H	H	H	A	H	H	A	A	A	A	A	A	A	A	A	A	A	A	A	A	A	A	A	A	G	A	H	H	A	H	A	A	A
6	93224782	S1H063728991	A	A	A	A	A	A	A	A	A	A	A	A	A	A	A	A	A	A	A	A	A	A	A	A	A	A	A	H	H	A	A	A	H	H	G	H	G	G	A	H	H	A	H	H	A	H	H
6	93258392	S1L063730335	C	C	C	C	H	C	C	C	C	H	H	C	C	C	C	C	C	C	H	H	T	T	H	H	H	T	H	C	C	H	H	C	C	C	C	C	C	C	C	C	C	C	C	C	C	H	H
6	93520734	SSH063740829	C	C	C	C	H	C	C	C	C	H	H	C	C	C	C	C	C	C	H	H	T	T	H	H	H	T	H	C	C	H	H	C	C	C	C	C	C	C	C	C	C	C	C	C	C	H	H
6	99994512	SNJ063999780	T	T	T	T	T	T	T	T	T	T	T	T	T	T	T	T	T	T	H	H	H	H	T	T	T	H	T	H	T	T	T	H	H	H	H	H	H	H	T	T	T	T	T	T	H	T	T
6	104205320	SFH064168212	A	A	A	A	A	A	A	A	A	A	A	G	G	G	G	G	H	H	G	G	G	G	G	G	G	G	G	G	G	G	G	G	G	G	G	G	G	G	G	G	G	H	G	G	G	H	H
6	106006303	SS1064240252	T	T	T	T	T	T	T	T	T	T	T	C	C	C	C	C	H	H	C	C	C	C	C	C	C	C	C	C	C	C	C	C	C	C	C	C	C	C	C	C	C	H	C	C	C	H	H
6	108660393	SAC064346415	A	A	A	A	A	A	H	H	H	A	A	H	H	H	H	H	A	H	H	H	H	H	A	A	A	H	A	A	A	A	A	A	A	A	A	A	A	A	A	A	A	A	A	A	A	H	A
6	114257130	SAH064570285	C	C	C	C	C	C	C	C	C	C	C	H	H	H	H	H	C	C	C	C	C	C	C	C	C	C	C	C	C	C	C	C	C	C	C	C	C	C	C	H	H	C	H	H	C	C	C
6	114391211	SFT064575648	G	G	G	G	G	G	H	H	H	G	G	G	G	G	G	G	G	G	G	G	G	G	G	G	G	G	G	G	G	G	G	H	H	H	H	H	H	H	G	H	H	G	H	G	G	H	G
6	116169197	S6J064646767	G	G	G	G	G	G	G	G	G	G	G	G	G	G	G	G	G	G	G	G	G	H	H	H	H	G	H	G	H	H	A	G	G	G	G	G	G	G	G	G	G	G	G	G	G	H	H
6	117380044	SFT064695201	G	G	G	G	G	G	G	G	G	G	G	H	G	H	G	H	G	G	G	G	G	G	G	G	G	G	G	H	H	H	G	G	G	G	G	G	G	G	H	G	G	H	G	H	G	G	G
6	118306557	SFT064732262	T	T	T	T	T	T	T	T	T	T	T	T	T	T	T	T	T	T	T	T	T	T	T	T	T	T	T	T	T	T	T	T	T	T	T	T	T	T	T	T	T	T	T	T	T	T	T
6	126033542	SS1065041341	G	G	G	G	G	G	H	G	G	H	H	G	H	G	H	G	G	G	G	G	G	G	G	G	G	G	G	G	G	G	G	G	G	G	G	G	G	G	H	G	G	G	G	G	H	H	H
6	127748190	gUNC12051017	H	H	H	H	C	C	H	H	H	H	H	A	A	A	A	A	A	A	A	A	A	A	A	A	A	A	A	A	A	A	A	A	A	A	A	A	A	A	A	A	A	A	A	A	A	A	A
6	136212951	DNJ065448518	A	A	A	A	A	A	A	A	A	A	A	A	A	A	A	A	A	H	H	A	A	A	A	A	A	A	A	A	A	A	A	A	A	A	A	A	A	A	A	A	A	A	A	A	A	H	A
6	140620273	SS1065624810	T	T	T	T	T	H	T	H	T	H	H	T	T	T	T	T	T	T	T	H	H	H	H	H	H	H	H	H	H	H	H	T	H	C	C	H	T	H	C	T	T	H	T	C	H	H	T
6	142992045	gJAX00629360	A	A	A	A	A	H	A	H	A	H	H	A	H	A	H	A	A	A	A	H	H	H	H	H	H	H	A	A	A	A	A	H	H	A	A	A	A	A	H	A	A	H	A	H	A	A	A
6	145325879	SAJ065813035	C	C	C	C	C	C	H	H	H	C	C	C	C	C	C	C	C	C	C	H	C	H	H	H	H	C	C	C	C	C	C	C	C	C	C	C	C	C	C	C	C	C	C	C	C	C	C
6	145984843	S3N065839393	C	C	C	C	H	H	H	C	H	C	C	C	C	C	C	C	C	C	C	C	C	C	C	C	C	C	C	C	C	C	C	C	C	H	H	C	C	C	C	C	C	C	C	C	C	C	C
6	147771660	S6J065910866	G	G	G	G	H	H	G	G	G	G	G	G	G	G	G	G	H	G	G	G	G	G	G	G	G	G	H	H	H	H	H	G	H	G	G	G	G	G	H	G	G	G	G	G	G	G	G
6	147795929	mJAX00148078	T	T	T	T	T	T	T	T	T	T	T	T	T	T	T	T	T	T	H	H	C	H	H	H	H	H	T	T	H	H	H	T	T	H	T	T	T	T	T	H	H	H	H	H	H	T	H
6	148143388	SAJ065925735	C	C	C	C	C	C	H	H	H	C	C	C	C	C	C	C	C	C	C	C	C	C	C	C	C	C	H	H	C	C	C	C	C	C	C	C	C	C	C	C	C	C	C	C	C	C	C
6	148927776	gJAX00630924	C	C	C	C	C	C	C	C	C	C	C	C	C	C	C	C	C	C	C	C	C	C	C	C	C	C	C	C	C	C	C	C	C	C	C	C	C	C	C	C	C	C	C	C	C	C	C
6	149405737	gUNC12365565	C	C	C	C	H	T	T	T	T	T	T	H	H	H	H	H	T	T	T	T	T	T	T	T	T	H	T	H	T	H	H	C	C	T	H	C	C	C	C	H	H	T	T	H	T	H	T
7	3287797	SBT070131511	H	H	T	H	C	C	C	C	C	C	C	C	C	C	C	C	H	C	C	C	C	C	C	C	C	C	C	C	C	C	C	C	C	C	C	C	C	C	C	T	H	C	T	H	T	T	T
7	3325556	SBT070133022	H	H	A	H	G	G	G	G	G	G	G	G	G	G	G	G	H	G	G	G	G	G	G	G	G	G	G	G	G	G	G	G	G	G	G	G	G	G	G	A	H	G	A	H	A	A	A
7	3325725	SBT070133029	H	H	A	H	G	G	G	G	G	G	G	G	G	G	G	G	H	G	G	G	G	G	G	G	G	G	G	G	G	G	G	G	G	G	G	G	G	G	G	A	H	G	A	H	A	A	A
7	4350873	gJAX00190001	C	C	C	C	H	H	C	C	C	C	C	C	C	C	C	C	C	C	C	C	C	C	C	H	C	H	H	C	H	H	C	H	H	H	H	H	H	H	H	C	C	C	C	C	C	C	C
7	4743344	SBT070189733	H	H	T	H	C	C	C	C	C	C	C	H	C	C	H	C	H	C	C	C	C	C	C	C	C	C	C	C	C	C	C	C	C	C	C	C	C	C	C	H	H	C	H	C	T	T	T
7	6470346	S6J070258813	A	A	A	A	A	A	A	A	A	A	A	A	A	A	A	A	A	A	A	A	A	A	A	H	A	H	A	A	H	H	A	A	H	A	H	H	H	A	H	A	A	A	A	A	A	A	A
7	6890526	S6Y070275621	G	G	G	G	G	G	G	G	G	G	G	G	G	G	G	G	G	G	G	G	G	G	G	H	G	H	G	G	H	H	G	G	H	G	H	H	H	G	H	G	G	G	G	G	G	G	G
7	7117054	S3N070284682	G	G	G	G	G	G	G	G	G	G	G	G	G	G	G	G	G	G	G	G	G	G	G	H	G	H	G	G	H	H	G	G	H	G	H	H	H	G	H	G	G	G	G	G	G	G	G
7	10616361	gICR1791	G	G	G	G	G	G	G	G	G	G	G	G	G	G	G	G	H	G	G	G	G	G	G	G	G	G	G	G	G	G	G	G	G	G	G	G	G	G	G	G	G	G	G	G	G	G	G
7	13001772	SBT070520070	G	G	G	G	G	G	G	G	G	G	G	G	G	G	G	G	G	G	G	G	G	G	G	G	G	G	G	G	G	G	G	G	G	G	G	G	G	G	G	G	G	G	G	G	H	G	G
7	13053508	SBJ070522140	C	C	C	C	C	C	C	C	C	C	C	C	C	C	C	C	C	C	C	C	C	C	C	C	C	C	C	C	C	C	C	C	C	C	C	C	C	C	C	C	C	C	C	C	H	C	C
7	13094306	SBJ070523772	T	T	T	T	T	T	T	T	T	T	T	T	T	T	T	T	T	T	T	T	T	T	T	T	T	T	T	T	T	T	T	T	T	T	T	T	T	T	T	T	T	T	T	T	H	T	T
7	13259578	SBT070530383	C	C	C	C	C	C	C	C	C	C	C	C	C	C	C	C	C	C	C	C	C	C	C	C	C	C	C	C	C	C	C	C	C	C	C	C	C	C	C	C	C	C	C	C	H	C	C
7	17639496	gJAX00632646	T	T	T	T	H	H	H	H	H	H	H	T	T	T	T	T	T	C	H	H	H	H	H	T	H	T	T	T	T	T	T	T	T	T	T	T	T	T	H	T	T	T	T	T	T	T	T
7	19602315	SAJ070784092	G	G	G	G	G	G	G	G	G	G	G	G	G	G	G	G	G	G	G	G	G	G	G	G	G	G	G	G	G	G	G	G	G	G	G	G	G	G	G	G	G	G	G	G	H	G	G
7	30774372	S6J071230974	H	H	H	H	C	C	C	C	C	C	C	C	H	H	C	H	C	C	C	C	C	C	C	H	C	H	H	H	C	C	H	H	C	C	C	C	C	H	C	C	C	C	C	C	C	H	H
7	31357192	gJAX00634830	T	T	T	T	T	T	T	T	T	T	T	T	T	T	H	H	H	T	T	T	T	H	H	T	H	T	T	T	T	T	T	T	H	H	H	H	H	T	H	H	H	T	H	T	T	T	T
7	34294209	S6J071371768	H	H	T	T	T	T	T	T	T	T	T	T	T	T	T	T	T	T	T	T	T	H	H	T	T	T	T	T	T	T	T	T	T	T	T	T	T	T	T	T	T	T	T	T	T	T	T
7	36408599	UNC12631322	G	G	G	G	G	G	H	H	H	H	H	H	G	G	H	G	H	G	H	G	G	H	H	G	G	G	G	G	G	G	G	G	G	G	G	G	G	G	G	H	G	G	H	H	G	G	G
7	37186222	SS1071487448	C	C	C	C	T	T	H	H	H	C	H	C	C	C	C	C	C	H	H	C	C	C	C	C	C	C	C	C	C	C	C	C	C	C	C	C	C	C	C	C	C	C	C	C	C	H	H
7	37263506	SS6071490540	G	G	G	G	A	A	H	H	H	G	H	G	G	G	G	G	G	H	H	G	G	G	G	G	G	G	G	G	G	G	G	G	G	G	G	G	G	G	G	G	G	G	G	G	G	H	H
7	45256496	SX1071810259	H	H	G	G	G	G	G	G	G	G	G	H	H	H	G	G	H	G	G	G	G	H	H	G	G	G	G	G	G	G	G	G	G	G	G	G	G	G	G	G	G	G	G	G	T	H	H
7	47118392	SX1071884735	C	C	C	C	C	C	C	C	C	C	C	H	H	H	C	C	C	C	C	C	C	H	H	C	C	C	C	C	C	C	C	C	C	C	C	C	C	C	C	C	C	C	C	C	H	H	H
7	48241514	SX1071929660	T	T	T	T	T	T	T	T	T	T	T	H	H	H	T	T	T	T	T	T	T	H	H	T	T	T	T	T	T	T	T	T	T	T	T	T	T	T	T	T	T	T	T	T	H	H	H
7	49823745	S3C071992949	G	G	G	G	G	G	G	G	G	G	G	G	G	G	G	G	G	G	G	G	G	H	H	G	G	H	G	G	G	G	G	G	G	G	G	G	G	G	G	G	G	G	G	G	G	G	G
7	51160449	mUNC070500524	G	G	G	G	G	G	G	G	G	H	G	G	G	G	G	G	H	G	H	H	A	H	H	H	H	H	G	G	G	G	G	G	H	H	H	H	H	G	H	G	G	H	H	H	H	G	G
7	52315939	SAJ072092637	G	G	G	G	G	G	H	H	H	H	H	H	H	H	G	G	G	G	G	G	G	G	G	G	G	G	G	G	G	G	G	G	G	G	G	G	G	G	G	H	H	H	H	H	G	G	G
7	53330140	SX1072133205	T	T	T	T	T	T	T	T	T	T	T	T	T	T	T	T	T	T	T	T	T	H	H	T	T	H	T	T	T	T	T	T	T	T	T	T	T	T	H	T	T	T	T	T	T	T	T
7	55022899	S6J072200915	C	C	C	C	C	C	C	C	C	H	C	C	C	C	C	C	H	C	H	H	T	H	H	H	H	H	C	C	C	C	C	C	H	H	H	H	H	C	C	C	C	H	H	H	H	C	C
7	55063256	SX1072202530	H	H	H	H	T	T	T	T	T	T	T	T	T	T	T	T	T	T	T	T	T	T	T	T	T	T	H	H	T	T	H	H	H	T	T	H	H	H	T	T	T	T	T	T	H	H	H
7	62240225	S6J072489609	G	G	G	G	G	G	G	G	G	G	G	G	G	G	G	G	H	G	H	G	H	H	H	G	G	G	G	G	G	G	G	G	G	G	G	G	G	G	G	A	A	H	G	G	H	G	G
7	63499809	SAJ072539992	H	H	H	H	T	T	H	H	H	H	H	H	H	H	T	T	T	T	T	T	T	T	T	T	T	T	T	T	T	T	T	T	T	T	T	T	T	T	T	T	T	T	H	H	T	T	T
7	64375009	S6J072575000	T	T	T	T	T	T	T	T	T	T	T	T	H	H	T	H	H	T	H	T	H	H	H	T	T	T	T	T	T	T	T	T	T	T	T	T	T	T	T	G	G	H	T	T	H	T	T
7	65964060	SX1072638562	C	C	C	C	H	H	H	H	H	C	H	C	C	C	C	C	C	H	C	H	C	C	C	H	H	C	C	C	C	C	C	C	C	C	C	C	C	C	C	C	C	C	C	C	C	C	C
7	66937769	S6J072677510	C	C	C	C	H	H	C	C	C	C	C	H	H	H	H	H	H	C	H	C	H	H	H	C	C	C	C	C	C	C	C	H	C	H	H	C	C	H	C	A	A	H	C	C	C	C	C
7	67847004	S3N072713880	C	C	C	C	C	C	C	C	C	C	C	C	C	C	C	C	C	C	C	C	C	C	C	C	C	C	H	H	C	C	H	H	H	C	H	H	H	H	H	C	C	C	C	C	H	H	H
7	75708490	SNJ073028339	H	H	A	A	A	A	H	H	H	H	H	A	A	A	A	A	H	A	H	A	H	A	A	A	A	A	A	A	A	A	A	A	A	A	A	A	A	A	H	A	A	A	H	H	A	A	A
7	77240527	S6J073089621	C	C	C	C	C	C	C	C	C	C	C	C	C	C	C	C	C	H	C	H	C	C	C	H	H	C	C	H	H	H	H	C	H	H	H	H	C	C	C	C	C	C	C	C	C	C	C
7	78461634	gUNC13192480	A	A	A	A	H	A	H	H	H	A	H	A	H	H	A	H	A	A	A	A	A	H	H	A	A	H	A	A	A	A	A	A	A	A	A	A	A	A	H	H	H	H	A	A	A	A	A
7	79711974	gUNC13209247	G	G	G	G	H	G	H	H	H	G	H	G	H	H	G	H	G	G	G	G	G	H	H	G	G	H	G	G	G	G	G	G	G	G	G	G	G	G	H	H	H	H	G	G	G	G	G
7	83216160	SX1073328646	C	C	H	H	H	C	H	H	H	C	H	C	H	H	C	H	C	C	H	C	C	C	C	C	C	C	H	H	C	H	H	C	C	C	C	C	C	C	H	H	H	H	C	C	C	C	C
7	84037201	SAJ073361488	H	H	H	H	H	H	T	T	T	T	T	H	T	T	C	H	H	T	H	T	H	T	T	T	T	T	T	T	T	T	T	T	T	H	T	T	T	T	T	H	H	H	H	H	T	T	T
7	92307358	S6J073692294	G	G	G	G	G	G	G	G	G	G	G	G	G	G	G	G	G	G	G	G	G	G	G	G	G	G	G	G	G	G	G	G	G	G	G	G	G	G	G	G	G	G	H	H	H	H	H
7	96414801	SFC073856592	C	C	C	C	C	C	C	C	C	C	C	C	C	C	C	C	C	C	C	C	C	C	C	C	C	C	C	C	C	C	C	C	C	C	C	C	C	C	C	C	C	C	C	C	H	H	H
7	96453890	SS1073858155	G	G	G	G	H	G	H	H	H	H	H	G	H	H	G	H	H	H	H	H	G	H	H	H	H	H	G	G	G	G	G	G	G	G	H	H	H	H	G	G	G	H	H	H	G	G	G
7	98425552	DNJ073937022	A	A	A	A	H	H	A	A	A	A	A	A	A	A	A	A	A	H	A	A	A	A	A	A	A	A	H	A	H	A	A	A	A	A	A	A	A	A	A	A	A	A	A	A	A	A	A
7	99222519	S3C073968900	C	C	C	C	C	C	C	C	C	C	C	H	H	H	C	C	C	C	C	C	C	C	C	C	C	C	C	C	C	C	C	C	C	C	C	C	C	C	C	C	C	C	C	C	C	C	C
7	99222621	S3C073968904	T	T	T	T	T	T	T	T	T	T	T	H	H	H	T	T	T	T	T	T	T	T	T	T	T	T	T	T	T	T	T	T	T	T	T	T	T	T	T	T	T	T	T	T	T	T	T
7	104480595	gJAX00155180	H	H	H	H	A	A	A	A	A	A	A	A	A	A	A	A	A	A	A	A	H	A	A	H	H	H	H	A	H	A	A	A	A	A	A	A	A	A	H	A	A	A	A	A	A	A	A
7	105551819	S6J074222072	H	H	H	H	G	G	G	G	G	G	G	G	G	G	G	G	G	G	G	G	H	G	G	H	H	H	H	G	H	G	G	G	G	G	G	G	G	G	G	G	G	G	G	G	G	G	G
7	108924588	SS1074356983	G	G	G	G	H	G	H	H	G	G	H	G	G	G	G	G	G	H	G	H	G	G	G	H	H	G	G	G	G	G	G	H	G	G	G	G	H	H	H	G	G	H	H	H	H	G	G
7	111189969	gJAX00155663	T	T	T	T	T	T	T	T	T	T	T	T	T	T	T	T	H	T	H	T	T	T	T	T	T	T	H	T	H	T	T	T	T	T	T	T	T	T	T	T	T	T	T	T	T	T	T
7	113210524	SS1074528420	G	G	G	G	H	G	H	H	G	G	H	H	H	H	G	G	G	G	G	G	G	G	G	G	G	G	G	G	G	G	G	G	G	G	G	G	G	G	G	G	G	H	H	H	H	G	G
7	113937074	gJAX00651708	C	C	C	C	C	C	C	C	C	C	C	C	C	C	C	C	H	C	H	C	C	C	C	C	C	C	C	C	C	C	C	H	H	C	C	C	C	C	C	C	C	C	C	C	C	H	H
7	114896359	SAJ074595854	H	H	T	T	H	T	C	C	H	H	C	H	H	H	H	H	H	C	H	C	H	H	H	C	C	H	C	H	H	H	T	H	T	T	H	H	C	C	C	C	C	C	C	C	C	C	C
7	115572135	SS1074622885	A	A	A	A	H	A	H	H	A	A	H	H	H	H	A	A	A	A	A	A	A	A	A	A	A	A	A	A	A	A	A	A	A	A	A	A	A	A	A	A	A	A	A	A	H	A	A
7	116677232	SS1074667089	C	C	C	C	H	C	H	H	C	C	H	H	H	H	C	C	C	C	C	C	C	C	C	C	C	C	C	C	C	C	C	C	C	C	C	C	C	C	C	C	C	C	C	C	C	C	C
7	116878328	SS1074675133	G	G	G	G	H	G	H	H	G	G	H	H	H	H	G	G	G	G	G	G	G	G	G	G	G	G	G	G	G	G	G	G	G	G	G	G	G	G	G	G	G	G	G	G	G	G	G
7	117607487	S3J074704299	C	C	C	C	C	C	C	C	C	C	C	H	H	H	C	C	C	C	C	C	C	C	C	C	C	C	C	C	C	C	C	C	C	C	C	C	C	C	C	C	C	C	C	C	C	C	C
7	118503425	UNC13712372	C	C	C	C	C	C	C	C	C	C	C	H	H	H	C	C	C	C	C	C	C	C	C	C	C	C	C	C	C	C	C	C	C	C	C	C	C	C	C	C	C	C	C	C	C	C	C
7	118648605	UNC13714923	G	G	G	G	G	G	G	G	G	G	G	H	H	H	G	G	G	G	G	G	G	G	G	G	G	G	G	G	G	G	G	G	G	G	G	G	G	G	G	G	G	G	G	G	G	G	G
7	121548307	SAC074861932	C	C	C	C	C	H	C	C	H	H	C	C	C	C	H	H	H	C	H	C	C	C	C	C	C	C	H	C	H	C	C	C	C	H	T	T	H	H	H	H	H	T	T	H	C	C	C
7	121590756	gJAX00156443	A	A	A	A	A	H	A	A	H	H	A	A	A	A	H	H	H	A	H	A	A	A	A	A	A	A	H	A	H	A	A	A	A	H	G	G	H	H	H	H	H	G	G	H	A	A	A
7	124677409	gUNC13782677	C	C	C	H	C	C	C	C	C	C	C	C	C	C	C	C	C	C	C	C	C	C	C	C	C	C	C	C	C	C	C	C	C	C	C	C	C	C	C	C	C	C	C	C	C	C	C
7	125118660	S6J075004746	C	C	C	C	C	C	C	C	C	C	C	C	C	C	C	C	C	C	C	C	C	C	C	C	C	C	C	C	C	C	C	C	C	C	C	C	C	C	C	C	C	C	C	C	C	C	C
7	125309706	UNC13792351	T	T	T	H	H	T	C	C	H	C	C	H	H	H	C	H	H	T	H	H	C	H	H	H	H	H	C	C	C	C	C	C	C	C	C	C	C	C	H	C	C	C	C	H	C	C	C
7	125445964	UNC13794073	T	T	T	H	T	T	T	T	T	T	T	T	T	T	T	T	H	T	H	T	T	T	T	T	T	T	T	T	T	T	T	T	T	H	H	H	T	T	T	T	T	T	T	T	H	H	H
7	126132639	JAX00156784	C	C	C	H	C	C	C	C	C	C	C	C	C	C	C	C	H	C	H	C	C	C	C	C	C	C	C	C	C	C	C	C	C	C	C	C	C	C	C	H	H	C	C	C	H	H	H
7	126715463	S6R075068618	G	G	G	G	G	G	G	G	G	G	G	G	G	G	G	G	G	G	G	G	G	G	G	G	G	G	G	G	G	G	G	G	G	G	G	G	G	G	G	G	G	G	G	G	G	G	G
7	126993493	gUNC13808080	C	C	C	C	C	C	C	C	C	C	C	C	C	C	C	C	C	C	C	C	C	C	C	C	C	C	C	H	H	H	T	C	C	H	H	H	C	C	H	C	C	C	C	C	C	C	C
7	127013666	S6J075080546	G	G	G	G	G	G	G	G	G	G	G	G	G	G	G	G	G	G	G	G	G	G	G	G	G	G	G	G	G	G	G	G	G	G	G	G	G	G	G	G	G	G	G	G	G	G	G
7	129557884	UNC13840814	G	G	G	H	G	G	G	G	G	G	G	G	G	G	G	G	H	G	H	G	H	G	G	G	G	G	G	G	H	G	H	G	G	G	G	G	G	G	G	H	H	G	G	H	H	H	H
7	133078825	JAX00656486	T	T	T	T	H	T	H	H	T	H	H	H	H	H	H	C	H	T	H	H	H	C	C	T	H	H	T	T	T	T	T	T	T	T	T	T	T	T	T	T	T	T	T	T	H	H	H
7	138678716	S1H075547148	H	H	G	H	G	G	G	G	G	G	G	H	H	H	H	G	G	H	G	G	G	G	G	G	G	G	G	H	G	H	G	H	H	A	H	H	H	H	H	H	H	H	H	G	G	G	G
7	139134277	ST2075565371	G	G	G	G	G	G	G	G	G	G	G	H	H	H	H	T	G	H	G	H	G	G	G	H	G	G	G	G	G	G	G	G	G	G	G	G	G	G	G	G	G	G	G	G	G	G	G
7	142384143	gUNC14022222	T	T	T	T	T	T	T	T	T	T	T	T	T	T	H	T	T	T	T	T	T	T	T	T	T	T	T	T	T	T	T	T	T	T	T	T	T	T	T	T	T	T	T	T	H	H	H
7	142438497	SNJ075697539	H	H	G	G	H	G	G	H	G	H	H	G	G	G	G	G	G	G	G	G	G	G	G	H	G	G	G	G	G	G	G	G	G	H	G	G	G	G	H	H	H	H	H	G	G	G	G
7	145072886	SAJ075802915	H	H	H	G	G	G	G	G	G	G	G	A	A	A	G	A	A	H	A	H	H	G	G	G	G	G	G	G	H	G	H	G	G	G	A	H	H	H	G	H	H	G	G	G	H	H	H
8	5737003	UNC14078146	H	G	G	G	G	G	G	G	H	H	H	G	G	G	G	G	G	G	H	G	G	G	G	G	G	G	G	G	A	G	G	G	G	G	G	G	G	G	H	G	G	G	G	G	H	G	H
8	8211944	S6J080328477	C	C	C	C	C	C	C	C	C	C	C	C	C	C	C	C	H	H	H	C	C	C	C	C	H	H	C	C	C	C	C	C	C	C	C	C	C	C	C	C	C	C	C	C	C	C	C
8	10158131	S6J080406325	C	C	C	C	C	C	C	C	C	C	C	T	H	C	C	H	C	C	C	H	H	H	H	C	C	C	H	H	H	H	H	C	C	C	C	H	H	H	C	H	H	C	H	H	H	H	C
8	10499490	gJAX00158787	G	G	G	G	G	G	G	G	G	G	G	G	G	G	G	G	G	G	G	G	G	G	G	G	G	G	G	G	G	G	G	G	G	G	G	G	G	G	G	H	G	H	G	G	G	G	G
8	11125180	SS1080445007	G	G	G	G	G	H	G	G	G	G	G	G	G	G	G	G	G	G	G	H	H	H	H	G	G	G	G	G	G	G	G	G	H	H	G	H	G	H	G	G	G	G	G	G	G	G	G
8	13125528	S6J080525021	H	A	A	H	A	A	A	A	A	A	A	A	A	A	A	A	A	A	A	H	H	A	A	A	A	A	A	A	H	A	A	A	A	A	A	H	H	H	A	H	H	A	H	H	A	A	A
8	29097075	S6J081163883	C	C	C	C	C	C	C	C	C	C	C	C	C	C	C	C	C	C	C	C	C	C	C	C	C	C	C	C	C	C	C	C	C	C	C	C	C	C	C	C	C	C	C	C	C	C	C
8	36656549	gJAX00665906	G	G	G	G	G	H	G	H	G	H	H	G	G	G	G	G	G	G	G	G	G	G	G	G	G	H	G	G	G	G	G	G	G	G	G	G	G	G	G	G	G	G	G	G	G	G	G
8	41288646	gJAX00666749	A	A	A	A	A	H	A	H	A	H	H	A	A	A	A	A	A	A	A	A	A	A	A	A	A	A	A	A	A	A	A	A	A	A	A	A	A	A	A	A	A	A	A	A	A	A	A
8	44002480	gJAX00161235	C	C	C	C	C	C	C	C	C	C	C	H	H	C	C	C	C	C	C	C	C	C	C	C	C	C	C	C	C	C	C	C	C	C	C	C	C	C	C	C	C	C	C	C	C	C	C
8	49619893	SFR081984795	G	G	G	G	G	H	H	H	H	H	H	G	H	G	G	G	G	G	G	G	G	G	G	G	G	G	G	G	G	G	G	G	G	H	H	G	G	G	G	H	H	G	H	H	G	G	H
8	50092013	SAJ082003680	H	A	A	H	A	A	A	A	A	A	A	A	A	A	A	A	A	A	A	A	A	A	A	A	A	A	A	A	A	A	A	H	H	H	A	H	A	H	A	H	A	H	A	A	A	A	A
8	53251891	SNJ082130075	C	H	H	C	C	C	C	C	H	H	C	C	C	C	C	C	C	C	C	C	C	C	C	C	C	C	H	H	H	H	C	H	H	C	H	H	T	H	C	C	C	H	C	C	C	C	C
8	55820412	SS1082232816	C	C	C	C	C	H	H	H	H	H	H	C	H	C	C	C	C	C	C	C	C	C	C	C	C	C	C	C	C	C	C	C	C	H	H	C	C	C	C	H	H	C	H	H	C	C	C
8	61785993	SNJ082471439	T	T	T	T	T	T	T	T	T	T	T	T	T	T	T	T	H	H	H	H	T	T	T	T	T	T	H	H	H	H	T	T	T	T	H	H	G	H	T	T	T	T	T	T	T	H	H
8	63836643	mJAX00670539	H	H	H	H	H	T	T	T	T	T	T	T	T	T	T	T	T	H	H	T	T	T	T	T	T	T	T	T	T	T	T	T	T	T	T	T	T	T	H	T	T	T	T	T	T	T	T
8	69015907	gJAX00671561	A	A	A	A	A	A	A	A	H	H	A	A	A	A	A	A	A	A	A	A	A	A	A	A	A	A	A	A	A	A	A	A	A	A	A	A	A	A	A	A	A	A	A	A	H	A	A
8	69967379	mJAX00671748	G	H	H	G	G	H	H	H	H	H	H	G	G	G	G	G	H	H	H	H	H	H	H	H	H	G	H	H	G	H	H	G	G	G	G	G	G	G	G	G	G	G	G	G	H	H	G
8	89059297	SFT083562371	C	C	C	C	C	C	C	C	C	C	C	C	C	C	C	C	C	C	C	C	C	C	C	C	C	C	C	C	C	C	C	C	C	C	C	C	C	C	C	C	C	C	C	C	C	C	C
8	90095833	SNJ083603833	G	G	G	G	G	G	G	G	G	G	G	G	G	G	G	G	G	G	G	G	G	G	G	G	G	G	G	G	G	G	G	G	G	G	G	G	G	G	G	G	G	G	G	G	G	G	G
8	92317228	JAX00676445	T	T	T	T	T	T	T	T	T	T	T	T	T	T	T	T	H	H	H	H	T	T	T	T	T	T	H	H	T	H	T	H	H	T	T	T	T	T	T	C	C	C	C	C	H	C	C
8	94572656	B10080094572	G	G	G	G	G	G	G	G	G	G	G	H	H	H	H	H	G	G	G	G	G	H	H	G	H	H	G	G	G	G	G	G	G	H	H	G	G	G	G	H	A	G	H	A	G	G	G
8	95464853	S6J083818594	H	H	H	T	T	T	T	T	T	T	T	T	T	T	T	T	T	T	H	T	T	T	T	T	T	T	T	T	T	T	T	T	T	T	T	T	T	T	T	T	T	T	T	T	T	T	T
8	98353259	S3J083934130	H	H	H	C	C	C	C	C	C	C	C	C	C	C	C	C	H	H	T	H	C	C	C	C	C	C	C	C	C	C	C	C	C	C	C	C	C	C	C	C	C	C	C	C	C	C	C
8	106155988	DZO084246239	G	G	G	G	G	G	H	G	H	A	H	G	G	G	H	H	G	G	G	A	H	A	A	G	A	A	H	G	G	H	H	H	H	G	H	H	H	H	H	G	G	G	G	G	H	H	H
8	106770309	S6J084270812	H	H	H	H	T	H	T	T	T	T	T	H	H	H	H	H	H	H	H	T	H	T	T	H	T	T	T	T	T	T	T	T	T	T	H	T	T	T	T	H	H	T	H	H	T	T	T
8	107251048	gJAX00165953	H	H	H	H	C	H	C	C	C	C	C	H	H	H	H	H	C	C	C	C	C	C	C	C	C	C	C	C	C	C	C	C	C	C	C	C	C	C	C	H	H	C	H	H	C	C	C
8	107906205	gUNCHS024142	H	H	H	T	T	H	T	T	T	T	T	H	H	H	H	H	T	T	T	T	T	T	T	T	T	T	T	T	T	T	T	T	T	T	T	T	T	T	T	H	H	T	H	H	T	T	T
8	108931102	SBJ084357244	C	C	C	C	C	C	C	C	C	C	C	C	C	C	C	C	C	C	C	C	C	C	C	C	C	C	C	C	C	C	C	H	H	C	C	C	C	C	C	C	C	C	C	C	C	C	C
8	111003579	gUNC15494386	C	C	C	C	C	H	C	C	C	C	C	C	C	C	C	C	C	C	C	C	C	C	C	C	C	C	C	C	C	C	C	C	C	C	C	C	C	C	C	C	C	C	C	C	C	C	C
8	111195972	mUNC15495823	H	H	H	C	C	C	C	C	C	H	H	C	C	C	C	C	H	H	C	C	H	C	C	C	C	C	C	C	C	C	C	C	C	C	C	C	C	C	C	C	C	C	C	H	C	C	C
8	111999342	JAX00680353	G	G	G	G	H	H	H	G	H	H	G	G	G	G	G	G	G	G	G	G	H	H	H	A	H	H	A	H	H	A	H	H	H	H	H	H	H	H	H	H	H	G	H	H	G	G	G
8	113317644	JAX00166407	H	H	H	A	A	A	A	A	A	A	A	A	A	A	A	A	H	H	A	A	H	A	A	A	A	A	A	A	A	A	A	A	A	A	A	A	A	A	H	H	H	H	H	H	A	A	A
8	113805161	SX1084552206	H	H	H	G	G	G	G	G	G	G	G	G	G	G	G	G	H	H	G	G	H	G	G	G	G	G	G	G	G	G	G	G	G	G	G	G	G	G	H	H	H	H	H	H	G	G	G
8	114013153	SX1084560526	H	H	H	C	C	C	C	H	C	C	H	C	C	C	C	C	H	H	C	C	H	C	C	C	C	C	C	C	C	C	C	C	C	C	C	C	C	C	H	H	H	H	H	H	C	C	C
8	115267168	DS1044980373	C	H	H	C	C	C	C	C	C	C	C	C	H	C	H	H	C	H	C	C	C	C	C	C	C	C	C	C	C	C	C	C	C	C	C	C	C	C	H	C	C	H	C	H	H	H	H
8	115983206	S2H084639328	G	G	G	H	H	H	H	G	H	H	H	G	G	G	G	G	G	G	G	G	G	G	G	G	G	G	G	G	G	G	G	G	G	G	H	H	H	H	H	H	H	H	H	G	G	G	G
8	121188874	gUNC15642188	T	T	T	T	T	T	T	T	T	T	T	T	T	T	T	T	H	T	T	T	T	T	T	H	T	T	T	T	T	T	T	T	T	T	T	T	T	T	T	H	H	T	H	T	T	T	T
8	121895967	SAJ084875838	C	C	C	C	C	C	C	C	C	C	C	C	C	C	C	C	C	C	C	C	C	C	C	H	C	C	H	C	C	H	H	C	C	C	C	C	C	C	C	C	C	C	C	C	C	C	C
8	122015785	SX1084880631	C	C	C	C	C	C	C	C	C	C	C	C	C	C	C	C	C	C	C	C	C	C	C	H	C	C	H	C	C	H	H	C	C	C	C	C	C	C	C	C	C	C	C	C	C	C	C
8	123263981	gJAX00682845	H	H	H	C	C	C	H	H	H	C	C	C	C	C	C	C	H	H	C	C	C	C	C	H	C	C	C	H	H	C	H	C	C	C	C	C	C	C	C	H	H	C	H	C	C	C	C
8	126659828	S6J085066393	C	C	C	C	H	H	C	C	C	H	H	C	C	C	C	C	C	C	C	H	T	H	H	H	H	H	H	T	T	H	H	C	C	H	H	H	H	H	H	H	H	H	H	H	C	C	C
8	129064656	S1H085162586	A	A	A	A	A	A	A	H	A	A	A	A	A	A	A	A	H	H	A	A	A	A	A	A	A	A	A	A	A	A	H	A	A	A	A	A	A	A	A	A	A	H	A	H	H	H	H
9	4092720	SAC090163708	G	G	G	G	G	G	G	G	G	G	G	G	H	H	G	H	G	G	G	G	G	G	G	G	G	G	G	G	G	G	G	G	G	G	G	G	G	G	G	G	G	G	G	G	G	G	G
9	14871341	SAC090594853	G	G	H	G	G	G	G	G	G	G	G	G	H	H	G	H	G	G	G	G	G	G	G	G	G	G	G	H	H	G	G	G	G	G	G	G	G	G	G	G	G	G	G	G	G	G	G
9	15510081	DZO090620403	H	H	H	H	H	C	H	C	H	H	C	C	C	C	C	C	C	G	H	C	C	C	C	C	C	C	C	C	C	C	C	C	C	H	H	H	C	H	H	C	C	C	C	C	H	H	H
9	16831532	SAJ090673261	G	G	G	G	G	G	G	G	G	G	G	H	A	A	H	A	G	G	G	G	G	G	G	G	G	G	G	H	H	G	G	G	G	G	G	G	H	G	G	G	G	G	G	G	G	G	G
9	21450142	S6J090858005	C	C	C	C	H	H	H	H	H	H	H	C	C	C	C	C	C	C	C	C	C	C	C	C	C	C	H	H	H	H	H	C	C	C	C	C	C	C	H	C	C	C	C	C	C	C	C
9	22302997	SFT090892119	H	H	H	T	H	H	H	H	H	H	H	T	T	T	T	T	T	T	T	H	H	H	H	H	H	T	T	T	T	T	T	H	H	T	T	T	H	T	T	H	H	H	T	T	T	T	T
9	27356338	gUNC16043985	T	T	H	T	T	T	H	T	H	H	H	T	T	T	T	T	G	H	T	T	T	T	T	T	T	T	T	T	T	T	T	T	T	T	T	T	T	T	T	H	H	H	T	T	T	T	T
9	28298786	S6J091131951	H	H	H	G	H	H	A	H	A	A	H	G	G	G	G	G	G	H	H	G	G	G	G	G	G	G	G	G	G	G	G	G	G	G	G	G	G	G	H	G	G	G	G	G	G	G	G
9	35412816	SAJ091416512	G	G	G	G	G	G	G	G	G	G	G	G	G	G	G	G	G	G	G	G	H	G	G	G	G	H	H	H	G	H	H	G	G	G	G	G	G	G	G	G	G	G	G	G	G	G	G
9	39603494	mJAX00690974	G	G	G	G	G	G	G	G	G	G	G	G	H	H	G	G	A	G	G	H	G	H	H	H	H	G	G	G	G	G	G	G	H	G	G	G	G	G	G	G	G	G	H	H	G	G	H
9	44372587	mUNC090529188	T	T	T	T	H	H	T	T	H	H	H	H	H	H	H	H	C	H	T	H	T	H	H	H	H	T	T	H	T	T	T	T	T	T	T	T	T	T	T	T	H	T	H	H	H	H	H
9	49570551	S2T091982822	H	A	A	H	H	G	A	H	H	H	G	G	G	G	G	G	G	G	G	G	G	G	G	G	G	G	G	G	G	G	G	G	H	H	H	H	G	H	G	H	G	G	G	G	G	G	G
9	51580608	gUNC16358637	H	T	T	T	H	H	T	T	T	T	T	T	H	T	T	T	H	H	H	H	T	H	H	H	H	T	T	T	T	T	T	T	T	T	T	T	T	T	H	T	T	T	T	T	C	C	C
9	52251828	SS1092090073	G	H	H	H	H	G	H	H	G	G	G	G	G	G	G	G	G	G	G	G	G	G	G	G	G	G	G	G	G	G	G	G	A	H	H	H	H	H	H	H	H	H	H	H	G	G	G
9	54170797	SS1092166831	G	H	H	H	H	G	H	H	G	G	G	G	G	G	G	G	G	G	G	G	G	G	G	G	G	G	G	G	G	G	G	G	H	G	H	G	H	H	H	H	H	H	H	H	G	G	G
9	57078190	mUNC16421405	H	G	G	G	G	G	G	G	G	G	G	H	H	G	G	G	H	H	G	H	H	H	H	H	H	H	G	G	G	G	G	G	H	H	G	H	G	G	G	G	G	G	G	G	G	G	G
9	59162514	SS1092366500	G	H	H	H	H	H	H	A	G	G	H	G	G	G	G	G	G	G	G	G	G	G	G	G	G	G	G	G	G	G	G	G	A	H	G	H	G	G	G	G	H	H	H	H	G	G	G
9	62335324	SBC092493412	C	C	C	C	H	C	C	C	C	C	C	C	C	C	C	C	C	C	C	C	C	C	C	C	C	C	C	C	C	C	C	H	H	C	C	C	C	C	C	C	C	C	C	C	H	H	C
9	63921995	SS1092556879	G	G	G	G	G	H	G	H	G	G	H	H	H	G	G	G	H	H	G	G	G	G	G	G	G	G	G	G	G	G	G	G	G	G	G	G	G	G	G	G	G	G	G	G	G	G	G
9	64737341	gUNC16515184	C	C	C	C	C	C	C	C	C	C	C	C	C	C	C	C	H	C	C	H	H	H	H	C	H	C	C	C	C	C	C	C	C	C	C	C	C	C	H	C	H	H	C	C	C	C	C
9	72578936	mUNC090141582	G	G	G	G	G	G	G	G	G	G	G	H	G	G	G	G	G	G	G	G	G	G	G	G	G	G	G	G	G	G	G	H	G	H	H	H	H	H	G	G	G	G	G	G	G	G	G
9	75593142	SAC093023725	C	C	C	C	C	C	C	C	C	C	C	H	C	H	H	H	C	C	C	C	C	C	C	C	C	C	C	C	C	C	C	C	C	C	C	C	C	C	C	H	C	C	H	H	C	C	C
9	75895762	SAJ093035830	C	C	C	C	C	C	C	C	C	C	C	C	C	C	C	C	C	C	C	C	C	C	C	C	C	C	C	T	C	C	H	C	C	C	C	C	C	C	C	C	C	C	C	C	C	C	C
9	80568817	SAH093222752	G	G	G	G	G	G	G	G	G	G	G	G	G	G	G	G	G	G	G	G	G	G	G	G	G	G	G	A	G	G	H	G	G	G	G	G	G	G	G	G	G	G	G	G	H	H	G
9	81643794	SAC093265751	G	G	G	G	G	G	G	G	G	G	G	G	G	G	G	G	G	G	G	G	G	G	G	G	G	G	G	T	G	G	H	G	G	G	G	G	G	G	G	G	G	G	G	G	H	H	G
9	86025984	DSB093441039	H	H	H	G	A	A	A	H	A	A	H	A	H	A	H	H	A	A	H	H	A	H	A	G	H	H	A	A	A	A	A	A	A	A	A	H	A	A	A	H	A	A	H	H	A	A	A
9	86563277	SFT093462531	G	G	G	G	G	G	G	G	G	G	G	H	G	H	G	G	G	G	G	G	G	G	G	G	G	G	G	G	G	G	G	G	G	H	H	G	H	H	G	G	G	G	G	G	G	G	G
9	98179654	SAJ093927186	H	H	H	H	T	H	H	T	H	H	H	H	C	H	C	C	H	H	C	H	H	C	C	C	C	C	C	C	C	C	C	T	C	C	C	C	H	H	H	C	H	H	C	C	H	H	C
9	101407054	SX1094056282	G	G	G	G	G	G	G	G	G	G	G	G	G	G	G	G	G	G	G	G	G	G	G	G	G	G	G	G	G	G	G	G	H	H	H	H	G	G	G	G	G	G	G	G	G	G	G
9	106622279	S6T094264891	T	T	T	T	T	T	T	T	T	T	T	T	T	T	T	T	T	T	T	H	H	H	H	T	T	H	T	T	T	T	T	T	T	T	T	T	T	T	T	T	T	T	T	T	T	T	T
9	107101217	S6J094284048	C	C	C	C	C	C	C	C	C	C	C	C	C	C	C	C	C	C	C	H	H	H	H	C	C	H	C	C	C	C	C	C	H	H	H	H	C	C	C	C	C	C	C	C	C	C	C
9	110625356	SFT094425014	H	H	G	H	G	G	G	G	G	G	G	G	G	G	G	G	G	G	H	G	G	G	G	A	H	H	G	G	G	G	G	G	G	H	H	H	H	H	G	A	H	H	H	H	G	G	G
9	111539540	gJAX00705519	G	G	G	G	G	G	G	G	G	G	G	G	G	G	G	G	G	G	G	G	G	G	G	G	G	G	G	G	G	G	G	G	G	G	G	G	G	G	H	G	G	H	H	H	G	G	G
9	115429315	SAC094617172	H	H	H	G	H	H	T	T	T	T	T	T	T	T	T	T	T	T	H	T	T	T	H	H	T	H	T	T	T	T	T	G	G	H	H	H	H	H	T	T	T	H	H	H	H	H	H
9	119650914	SBT094786036	C	C	C	C	C	C	C	C	C	C	C	H	C	C	H	H	H	T	H	H	H	C	C	H	H	C	H	C	H	H	H	H	C	H	H	H	H	H	H	T	T	T	T	T	H	H	T
9	120016907	S6J094800676	G	H	G	H	G	G	G	H	G	G	H	H	H	T	G	G	G	G	G	G	G	H	G	G	H	G	H	H	H	H	H	G	H	H	H	H	G	G	G	G	G	G	G	G	G	G	G
9	120583184	SS1094823327	H	A	H	A	A	A	A	A	A	A	A	A	A	A	A	A	A	A	A	A	A	A	A	A	A	A	A	A	A	A	A	H	A	A	A	A	H	H	A	A	A	A	A	A	A	A	A
9	121791404	SAC094871656	H	H	H	H	C	C	H	C	H	H	C	C	H	C	H	H	T	H	C	H	C	C	C	C	C	C	C	C	C	C	C	C	H	H	H	H	C	C	C	C	C	C	C	C	C	C	H
10	4731748	S6J100189269	C	C	C	C	C	C	C	C	C	C	C	C	H	C	H	H	C	C	C	C	C	C	C	C	C	C	C	C	C	C	C	H	C	C	C	C	C	C	C	C	C	C	C	C	H	H	H
10	8980910	gJAX00282343	G	G	G	G	H	G	H	H	H	H	H	G	G	G	G	G	H	H	H	G	G	G	G	G	G	G	G	G	G	G	G	H	G	G	G	G	G	G	G	H	H	H	H	H	H	H	H
10	9553839	SX1100382153	G	G	G	G	G	G	G	G	G	H	H	G	G	G	G	G	G	G	G	H	G	G	G	H	G	G	G	G	G	G	G	H	G	H	H	G	H	G	G	G	H	G	H	H	G	G	G
10	11048758	JAX00014898	T	T	T	T	T	H	T	T	T	H	H	T	T	T	T	T	T	T	T	H	T	T	T	H	T	T	T	T	T	T	T	H	T	H	H	T	H	T	T	T	H	T	H	H	T	T	T
10	13991397	SSH100559655	H	H	G	G	G	H	G	G	G	H	H	G	G	G	G	G	G	G	G	G	G	G	G	G	G	G	G	G	G	G	G	H	G	H	G	G	H	G	G	G	H	G	H	H	G	G	G
10	14013985	SSH100560559	H	H	G	G	G	H	G	G	G	H	H	G	G	G	G	G	G	G	G	G	G	G	G	G	G	G	G	G	G	G	G	H	G	H	G	G	H	G	G	G	H	G	H	H	G	G	G
10	14429237	SSH100577169	H	H	C	C	C	H	C	C	C	H	H	C	C	C	C	C	C	C	C	C	C	C	C	C	C	C	C	C	C	C	C	C	C	H	C	C	H	C	C	C	H	C	H	H	C	C	C
10	15870112	SAH100634804	C	C	C	C	C	H	C	C	C	H	H	C	C	C	C	C	C	C	C	C	C	C	C	C	C	C	C	C	C	C	C	C	C	H	C	C	H	C	C	C	C	C	C	C	H	H	H
10	16102733	DAJ100644109	T	T	T	T	T	H	T	T	T	H	H	T	T	T	T	T	T	T	T	T	T	T	T	T	T	T	T	T	T	T	T	T	T	H	T	T	H	T	T	T	T	T	T	T	H	H	H
10	18047992	S6J100721919	G	G	G	G	H	G	H	H	H	G	G	H	H	H	T	H	G	G	G	H	G	G	G	G	G	G	H	G	H	G	H	H	G	H	G	H	H	G	G	G	G	G	G	G	G	G	G
10	22613783	mJAX00015759	G	G	A	H	H	G	G	H	G	H	G	H	G	H	G	G	G	G	G	G	G	G	G	H	H	H	G	G	G	G	G	G	G	G	G	G	G	G	G	G	H	G	H	H	G	G	G
10	24957161	S2R100998286	T	T	T	T	T	T	T	T	T	T	T	T	T	T	T	T	T	T	T	T	T	T	T	T	T	T	T	T	T	T	T	H	T	H	T	H	H	T	C	T	T	T	T	T	T	T	T
10	25125710	UNC17605965	G	G	G	G	H	G	H	H	H	G	G	G	G	G	G	G	G	G	G	G	H	G	G	G	G	G	G	G	G	G	G	G	G	G	H	H	G	H	G	G	G	G	G	G	G	G	G
10	25171278	SAH101006851	G	G	G	G	H	G	H	H	H	G	G	G	G	G	G	G	G	G	G	G	H	G	G	G	G	G	G	G	G	G	G	G	G	G	H	H	G	H	G	G	G	G	G	G	G	G	G
10	27985079	SS1101119403	T	T	T	T	T	T	T	T	T	T	T	H	T	H	H	T	T	T	T	T	T	T	T	T	T	T	T	T	T	T	T	T	T	T	T	T	T	T	T	T	T	T	T	T	T	T	T
10	28089868	SFT101123594	H	H	G	G	H	G	H	H	H	G	G	G	G	G	G	G	H	H	H	G	H	H	H	G	H	H	H	H	H	G	G	A	G	H	G	H	H	G	G	G	G	G	G	G	H	H	H
10	28624918	ST2101144996	C	C	H	H	C	C	C	C	C	C	C	C	C	C	C	C	C	H	H	C	C	C	C	H	H	H	C	C	C	C	C	C	H	C	H	C	C	H	C	H	H	A	H	C	C	C	C
10	28843661	JAX00286286	H	H	C	C	H	C	C	H	C	H	C	H	H	H	H	H	C	C	C	C	C	C	C	C	C	C	C	C	C	C	C	H	C	C	C	C	C	C	C	C	C	C	C	C	C	C	C
10	28861595	JAX00016227	H	H	G	G	H	G	G	H	G	H	G	H	H	H	H	H	G	G	G	G	G	G	G	G	G	G	G	G	G	G	G	H	G	G	G	G	G	G	G	G	G	G	G	G	G	G	G
10	29152405	S3C101166096	H	H	G	G	H	G	G	H	G	H	G	H	H	H	H	H	G	G	G	G	G	G	G	G	G	G	G	G	G	G	G	H	G	G	G	G	G	G	G	G	G	G	G	G	G	G	G
10	29225095	ST2101169003	T	T	T	T	H	T	H	H	H	T	T	T	T	T	T	T	H	T	T	H	T	H	H	H	T	T	H	H	G	H	G	T	H	H	H	H	H	H	T	H	H	T	H	G	H	H	H
10	39051062	S2J101562042	C	C	C	C	H	C	C	H	C	H	C	C	C	C	C	C	C	C	C	H	C	H	H	H	C	C	H	H	T	H	T	C	C	C	H	H	C	H	C	H	H	C	H	T	C	C	C
10	39261855	gJAX00287591	G	G	G	G	G	G	G	G	G	H	H	G	G	G	G	G	G	G	G	G	G	H	H	G	G	G	G	G	G	G	G	G	A	G	H	G	G	H	G	G	H	H	H	G	G	G	G
10	39727875	gUNC17800735	C	C	C	C	H	C	H	H	H	C	C	C	C	C	C	C	C	C	C	C	C	C	C	C	C	C	C	C	C	C	C	C	C	C	C	C	C	C	C	C	C	C	C	C	C	C	C
10	42254474	ST2101690178	C	C	C	C	C	C	C	C	C	C	C	H	H	C	C	C	C	C	C	C	C	C	C	C	C	C	C	C	C	C	C	C	C	C	C	C	C	C	C	C	C	C	C	C	C	C	C
10	45668615	B10100045668	H	G	H	H	H	G	G	H	H	H	G	G	G	G	G	G	H	G	G	G	H	G	G	H	H	H	A	A	H	H	G	G	G	G	H	H	G	H	H	H	G	G	G	H	G	G	G
10	46923178	gJAX00288784	C	C	C	C	H	C	C	C	C	C	C	H	C	H	H	C	C	C	C	C	C	C	C	C	C	C	C	C	C	C	C	C	H	C	H	C	C	H	C	C	C	C	C	C	C	C	C
10	47253852	gJAX00017599	H	H	H	H	H	A	H	H	H	C	C	C	H	C	C	H	C	C	C	H	C	H	H	H	C	C	C	C	C	C	C	C	C	H	C	C	H	C	C	C	C	C	C	C	H	H	H
10	50736608	gUNC17943756	H	A	H	H	A	A	A	H	H	A	A	A	A	A	A	A	G	A	A	A	H	A	A	H	H	H	G	G	H	H	A	A	A	A	H	H	A	H	H	H	A	A	A	H	A	A	A
10	52433392	SAH102097335	G	G	G	G	G	G	H	G	G	H	H	H	G	H	H	G	G	G	G	H	G	G	G	G	G	G	G	G	H	G	H	G	H	G	G	G	G	G	G	G	H	H	H	G	G	G	G
10	54605190	SS1102184207	T	T	T	T	T	H	T	T	T	H	H	H	H	T	T	T	T	H	H	T	T	T	T	T	T	T	T	T	T	T	T	H	T	H	T	H	H	T	T	T	T	T	T	T	T	T	T
10	56608541	SSR102264341	H	A	H	H	G	G	G	G	G	G	G	G	H	H	H	A	G	H	H	G	H	H	H	G	H	H	G	G	G	G	G	H	G	G	G	G	G	G	H	G	G	G	G	G	G	G	G
10	56612766	ST2102264510	H	T	H	H	C	C	C	C	C	C	C	C	H	H	H	T	C	H	H	C	H	H	H	C	H	H	C	C	C	C	C	H	C	C	C	C	C	C	H	C	C	C	C	C	C	C	C
10	56711515	SSR102268460	H	A	H	H	A	G	A	A	A	A	A	H	H	A	A	A	H	A	A	H	H	A	A	G	H	H	H	H	A	H	A	A	A	H	H	H	H	H	A	H	A	A	A	H	H	H	H
10	56711565	ST2102268462	H	C	H	H	C	A	C	C	C	C	C	H	H	C	C	C	H	C	C	H	H	C	C	A	H	H	H	H	C	H	C	C	C	H	H	H	H	H	C	H	C	C	C	H	H	H	H
10	56712174	SSR102268486	H	C	H	H	C	A	C	C	C	C	C	H	H	C	C	C	H	C	C	H	H	C	C	A	H	H	H	H	C	H	C	C	C	H	H	H	H	H	C	H	C	C	C	H	H	H	H
10	57788834	S6J102311553	A	A	A	A	A	A	A	A	A	A	A	H	A	H	H	A	H	A	A	A	A	A	A	A	A	A	A	A	A	A	A	A	A	A	A	A	A	A	A	A	H	A	H	H	A	A	A
10	62254893	mJAX00195713	G	G	G	G	G	H	G	G	G	G	G	H	T	G	G	H	G	G	G	G	G	H	H	G	G	G	H	H	G	H	G	G	G	G	G	G	G	G	H	G	G	G	G	G	G	G	G
10	63886068	gJAX00290978	G	G	G	G	H	G	G	G	G	G	G	G	G	G	G	G	H	G	G	G	G	G	G	G	G	G	G	G	G	G	G	G	G	G	G	G	G	G	G	G	G	G	G	G	G	G	G
10	63959065	SAH102558362	C	C	C	C	C	C	H	C	C	T	T	C	C	C	C	C	C	C	C	H	C	C	C	C	C	C	C	C	C	C	C	C	C	C	C	C	C	C	C	H	C	H	C	C	C	C	C
10	64229601	JAX00018835	G	G	G	G	G	H	G	G	G	G	G	H	T	G	G	H	G	G	G	G	G	H	H	G	G	G	H	H	G	H	G	G	G	G	G	G	G	G	H	G	G	G	G	G	G	G	G
10	66900998	JAX00291445	G	G	G	G	G	G	G	G	G	G	G	G	G	G	G	G	G	G	G	G	G	G	G	G	G	G	G	G	G	G	G	G	G	G	G	G	G	G	G	G	G	G	G	G	G	G	G
10	67758184	JAX00019098	G	G	G	G	H	G	G	G	G	G	G	G	G	G	G	G	G	G	G	G	G	G	G	G	G	G	G	G	G	G	G	G	G	H	G	G	H	G	G	G	G	G	G	G	G	G	G
10	72243343	S6J102889733	G	G	G	G	G	G	H	H	H	H	H	H	G	A	A	H	G	G	G	H	H	G	G	A	A	H	G	G	G	G	G	G	G	G	G	G	G	G	G	G	G	G	G	G	G	G	G
10	74789015	S6J102991560	C	C	C	C	C	C	H	H	H	H	H	H	C	T	T	H	C	C	C	H	C	C	C	H	H	H	C	C	C	C	C	C	C	H	C	C	H	C	H	C	C	C	C	C	C	H	H
10	77059925	S6J103082397	H	H	H	H	T	T	T	T	T	H	H	H	T	H	H	T	T	T	T	H	T	T	T	T	H	H	T	T	T	T	T	T	T	T	T	T	T	T	H	T	T	T	T	T	T	H	H
10	78298096	S3J103131923	G	G	G	G	H	H	G	G	G	G	G	G	G	G	G	G	H	H	H	G	H	A	A	H	G	H	G	G	H	G	H	G	G	G	G	G	G	G	G	G	G	G	G	G	G	G	G
10	80048749	S6J103201949	H	H	H	H	C	C	C	C	C	C	C	H	H	H	H	H	H	C	C	H	C	C	C	C	H	H	C	C	C	C	C	C	C	C	C	C	C	C	H	C	C	C	C	C	C	H	H
10	82823521	DZO103312940	G	G	G	G	G	H	G	G	G	G	G	G	G	G	G	G	H	G	G	G	G	G	G	H	H	G	G	G	G	G	G	H	H	H	A	A	H	A	G	H	H	H	H	H	G	H	G
10	83321847	S6J103332873	C	C	C	C	C	C	C	C	C	C	C	T	T	H	H	H	C	C	C	H	C	C	C	C	H	H	C	C	C	C	C	C	C	C	C	C	C	C	H	C	C	C	C	C	C	H	H
10	83515661	SAJ103340626	G	G	G	G	G	G	G	H	H	G	G	G	G	G	G	G	G	H	H	G	H	G	G	G	G	G	H	H	G	A	H	G	H	G	G	G	G	G	G	G	G	G	G	G	A	G	H
10	84437015	SAH103377480	C	C	C	C	C	C	H	T	T	C	H	C	C	C	C	C	C	H	H	C	H	C	C	C	C	C	H	H	C	T	H	C	H	H	C	C	H	C	C	C	C	C	C	C	T	C	H
10	86960811	SAJ103478432	G	G	G	G	G	G	H	A	A	G	H	G	G	G	G	G	G	H	H	G	H	G	G	G	G	G	H	H	G	A	H	G	H	H	G	G	H	H	G	G	G	G	G	G	A	G	H
10	87538398	S3J103501535	C	C	C	C	T	C	C	C	C	H	C	C	C	C	C	C	C	C	C	C	C	C	C	C	C	C	C	C	C	C	C	C	C	C	C	C	C	C	H	C	H	T	H	C	C	C	C
10	87712931	SAH103508517	G	G	G	G	G	G	H	T	T	G	H	G	G	G	G	G	G	H	H	G	H	G	G	G	G	G	H	H	G	T	H	G	H	H	G	G	H	H	G	G	G	G	G	G	T	G	H
10	87724845	gUNC18378272	A	A	A	A	G	A	A	A	A	H	A	A	A	A	A	A	A	A	A	A	A	A	A	A	A	A	A	A	A	A	A	A	A	A	A	A	A	A	H	A	H	G	H	A	A	A	A
10	92177120	DNJ103687084	G	G	G	G	G	G	G	G	G	G	G	G	G	G	G	G	H	G	H	H	H	G	G	G	H	H	G	G	G	G	G	G	H	G	H	G	H	H	G	G	G	G	G	G	G	G	G
10	93482428	mUNC18454335	A	A	A	A	H	H	H	A	A	A	H	G	H	H	H	A	A	A	A	A	A	A	A	A	A	A	H	H	H	G	G	A	A	A	A	A	A	A	A	A	A	A	A	A	A	A	A
10	98437231	gJAX00196462	G	G	G	G	H	G	G	G	G	G	G	G	G	G	G	G	G	G	G	G	G	H	H	G	H	H	H	H	H	G	G	G	G	G	G	G	G	G	G	H	G	G	H	G	G	G	G
10	100085352	gJAX00297233	G	G	G	G	G	G	G	H	H	A	H	H	A	G	G	H	G	G	G	H	G	G	G	G	G	G	H	H	G	H	H	H	H	G	A	H	H	H	H	G	H	H	H	G	H	H	H
10	106032881	gJAX00297997	A	H	A	A	A	A	A	A	A	A	A	A	A	A	A	A	A	A	A	A	A	A	A	A	A	A	H	H	H	A	H	A	A	A	A	A	A	A	A	H	A	A	H	A	A	A	A
10	107172709	gJAX00298189	T	T	T	T	H	H	T	T	T	T	T	T	T	T	T	T	H	T	T	T	T	T	T	T	T	T	T	T	T	T	T	H	T	H	T	H	T	T	H	H	T	T	T	H	T	T	T
10	115057924	S6J104602316	H	C	C	C	C	C	C	H	H	H	H	C	C	C	C	C	C	C	C	C	C	C	C	C	C	C	C	C	C	C	C	C	C	C	C	C	C	C	C	C	C	C	C	C	C	C	C
10	119038807	S6J104761552	C	C	C	C	C	C	C	C	C	C	C	H	H	C	C	C	C	C	C	C	C	C	C	C	C	C	C	C	C	C	C	C	C	C	C	C	C	C	C	C	C	C	C	C	H	H	H
10	120916126	gUNC18856953	A	A	A	A	A	A	A	A	A	A	A	A	A	A	A	A	A	A	A	A	A	A	A	A	A	A	A	A	H	H	H	A	A	A	A	A	A	A	A	A	H	H	A	H	A	A	A
10	120949764	S6J104837990	C	C	C	C	C	C	C	C	C	C	C	C	C	C	C	C	C	C	C	C	C	C	C	C	C	C	C	C	C	C	C	H	C	C	H	C	C	C	C	C	C	C	C	C	H	H	H
10	130016478	gUNC18984159	A	H	A	A	G	H	G	A	H	A	H	H	H	A	A	A	A	A	A	H	A	A	A	A	A	A	G	G	G	G	G	A	G	H	H	H	A	A	A	A	H	H	A	H	H	H	H
11	4776222	S6J110191048	H	H	H	H	G	H	G	G	G	G	G	G	H	H	H	H	G	G	G	G	G	G	G	G	G	G	G	G	G	G	G	G	G	G	G	G	G	G	G	G	G	G	G	G	G	G	G
11	4826399	SAC110193055	H	G	H	H	G	G	H	H	G	G	G	G	H	G	G	H	H	H	H	G	G	G	G	G	G	G	G	G	G	G	G	G	G	G	G	G	G	G	G	H	H	H	H	H	G	G	G
11	5889573	S6R110235582	H	H	H	H	C	H	C	C	C	C	C	C	H	H	H	H	C	C	C	C	C	C	C	C	C	C	C	C	C	C	C	C	C	C	C	C	C	C	H	C	C	C	C	C	C	C	C
11	6504417	S6J110260176	H	H	H	H	C	C	C	C	C	C	C	C	H	H	H	H	C	C	C	C	C	C	C	C	C	C	C	C	C	C	C	C	C	C	C	C	C	C	H	C	C	C	C	C	C	C	C
11	7285010	SFH110291400	A	A	A	A	A	A	A	A	A	A	A	H	H	A	A	A	H	H	A	H	H	A	A	A	A	A	A	A	H	H	H	H	A	A	A	A	A	A	A	A	A	A	A	A	A	A	A
11	10955970	gUNC19080247	G	G	G	G	G	G	G	G	G	G	G	H	H	G	G	G	H	H	G	G	G	G	G	G	G	G	G	H	G	H	G	G	G	G	G	G	G	G	H	H	G	G	H	G	G	G	H
11	14333944	SAJ110573357	T	T	T	T	T	T	T	T	T	T	T	T	T	T	T	T	T	T	T	T	T	T	T	T	T	T	H	T	H	T	H	T	T	H	T	T	T	T	T	T	T	T	T	T	T	T	T
11	18913799	SNJ110756551	H	H	H	H	C	C	C	C	C	C	C	C	C	C	C	C	C	C	H	H	H	C	C	C	C	C	C	C	C	C	C	C	C	C	C	C	C	C	C	H	H	H	H	C	H	H	H
11	24418764	SNJ110976750	A	A	A	A	G	H	H	H	A	A	H	A	H	A	H	H	H	H	A	A	A	A	A	A	A	A	A	A	A	A	A	A	A	A	H	A	H	H	A	A	A	A	A	A	H	H	H
11	26895790	S6R111075831	C	C	C	C	H	C	C	C	H	H	H	C	C	C	C	C	H	C	C	C	C	C	C	C	C	C	C	C	C	C	C	C	C	C	C	C	C	C	H	H	H	H	H	C	H	H	H
11	36222300	gUNC19415639	G	G	G	G	G	G	G	G	G	G	G	G	G	G	G	G	G	G	G	G	G	G	G	G	G	G	G	G	G	G	G	G	G	G	G	G	G	G	G	G	G	G	G	G	G	G	G
11	39444310	B10110039444	A	A	A	A	A	A	H	H	A	A	A	H	H	A	H	A	A	A	A	A	H	A	H	A	H	A	A	A	A	A	A	H	A	A	A	A	A	A	A	A	A	A	A	H	A	A	A
11	42369974	gUNC19491427	H	A	H	H	A	A	A	A	A	A	A	A	A	A	A	A	A	A	A	A	A	A	A	A	A	A	H	H	H	A	H	H	H	H	A	A	A	H	G	H	H	H	H	H	A	A	A
11	53029947	SAJ112121197	G	G	G	G	G	G	G	G	G	G	G	G	G	G	G	G	G	G	G	G	G	G	G	G	G	G	G	G	G	G	G	G	G	G	G	G	G	G	G	H	H	H	H	G	H	H	H
11	53549729	gUNC19641983	H	C	H	H	H	H	C	C	H	H	C	H	C	H	C	C	C	C	C	C	C	C	C	C	C	C	C	C	C	C	C	H	H	C	C	C	C	C	H	C	C	C	C	H	C	C	C
11	56653819	S6J112266152	G	G	G	G	G	G	G	H	G	G	G	H	A	H	A	H	H	G	G	H	G	H	H	H	G	H	G	G	G	G	G	G	G	G	G	G	G	G	H	A	A	A	A	H	G	G	H
11	57068280	S6J112282731	G	G	G	G	G	G	G	H	G	G	G	H	A	H	A	H	H	G	G	H	G	H	H	H	G	H	G	G	G	G	G	G	G	G	G	G	G	G	H	A	A	A	A	H	G	G	H
11	58889867	S3C112355594	H	C	H	H	H	H	C	C	H	H	C	H	C	H	C	C	C	C	C	C	C	C	C	C	C	C	C	C	C	C	C	C	H	C	H	H	H	H	H	C	C	C	C	H	C	H	H
11	59020565	SNJ112360822	H	T	H	C	H	H	H	H	C	C	H	C	C	C	C	H	H	H	C	C	C	C	C	C	C	C	H	T	T	H	T	H	C	H	C	C	C	H	C	C	C	C	C	C	C	C	C
11	67124182	S6J112684967	T	T	T	H	T	H	T	T	T	T	T	T	T	T	T	T	H	T	T	T	T	T	T	T	T	T	T	T	T	T	T	T	H	H	T	T	T	T	T	T	T	T	T	T	T	T	T
11	68141472	mUNC19852326	G	G	G	H	G	H	G	G	G	G	G	G	G	G	G	G	H	G	G	G	G	G	G	G	G	G	G	G	G	G	G	H	H	H	G	G	G	G	G	G	G	G	G	G	G	G	G
11	71714306	S1H112868572	T	T	T	T	T	T	T	T	T	T	T	T	H	T	H	H	T	T	T	T	T	H	T	T	T	T	T	T	T	T	T	T	T	T	T	T	T	T	T	H	H	H	H	T	T	T	T
11	72351970	SS1112894078	G	G	G	G	G	G	G	G	G	G	G	G	G	G	G	G	G	G	G	H	G	G	G	G	G	G	G	G	G	G	G	G	G	G	G	G	G	G	G	H	H	H	G	H	G	G	G
11	76070088	SAJ113042803	G	G	G	H	A	H	A	H	H	G	A	H	G	H	G	G	G	G	G	G	H	G	G	G	G	G	G	G	G	G	G	G	H	H	G	G	G	G	G	G	G	G	G	G	G	G	H
11	77003762	S6J113080150	G	G	G	G	G	G	G	G	G	G	G	G	H	H	H	G	H	G	G	G	G	G	G	G	G	G	G	G	G	G	G	H	G	G	G	G	G	G	G	G	G	G	G	G	G	G	G
11	77455061	gUNC19949895	T	T	T	T	C	C	C	H	C	H	C	C	C	C	C	C	C	C	C	C	C	C	H	C	H	H	T	C	C	H	C	H	C	C	C	C	C	H	H	H	H	H	H	H	H	T	H
11	79106280	gJAX00316000	G	G	G	H	T	T	T	H	T	H	T	H	T	T	T	H	H	H	T	T	T	T	H	T	H	H	G	H	H	H	H	H	T	T	T	T	T	H	H	T	T	T	H	T	H	G	H
11	83666000	S6J113346640	G	G	G	G	G	G	G	G	G	G	G	H	A	A	H	G	G	G	G	G	G	H	G	H	G	G	G	G	G	G	G	H	G	G	G	G	G	G	G	G	G	G	G	G	G	G	G
11	85174109	gJAX00317058	A	A	A	A	H	A	H	A	H	A	H	A	A	A	A	A	A	A	A	A	A	A	A	A	A	A	A	A	A	A	A	A	A	A	A	A	A	A	A	A	A	A	A	A	A	A	A
11	86132781	gUNC20050848	T	T	T	T	T	T	T	T	T	T	T	T	T	T	T	T	H	T	H	H	T	H	T	T	H	T	T	H	T	T	H	H	T	T	H	H	H	C	T	T	T	T	T	T	T	T	T
11	89253768	S6J113570150	A	A	A	A	A	A	A	A	A	A	A	A	A	A	A	A	A	A	A	A	A	A	A	A	A	A	A	A	A	A	A	A	A	A	A	A	A	A	A	A	A	A	A	A	A	A	A
11	89366347	SNJ113574653	G	G	G	G	G	G	G	G	G	G	G	H	A	A	H	G	H	A	H	H	G	G	G	G	G	G	G	G	G	G	G	H	G	G	G	G	G	H	G	G	G	G	G	G	A	G	G
11	93472995	JAX00318573	G	G	G	G	H	G	H	G	H	G	H	G	G	G	G	G	G	G	G	G	G	G	G	G	G	G	H	G	G	G	H	G	G	G	G	G	G	G	G	G	G	G	G	G	G	G	G
11	95240537	S6J113809621	G	G	G	G	G	G	G	G	G	G	G	G	G	G	G	G	G	G	G	G	G	G	G	G	G	G	G	G	G	G	G	G	G	G	G	G	G	G	H	G	G	G	G	G	G	G	G
11	96767752	S6J113870710	G	G	G	G	G	G	G	G	G	G	G	G	G	G	G	G	G	G	G	G	G	G	G	G	G	G	G	G	G	G	G	G	G	G	G	G	G	G	G	G	G	G	G	G	G	G	G
11	96986958	gUNC20200281	G	G	G	G	G	H	G	H	G	H	G	H	H	H	H	H	H	G	G	G	G	H	G	G	H	G	H	G	H	H	G	G	H	H	G	G	G	H	H	H	H	H	H	H	G	G	G
11	102369228	UNC20267835	C	C	C	C	C	C	C	C	C	C	C	C	C	C	C	C	C	C	C	C	C	C	C	C	C	C	C	C	C	C	C	H	C	C	C	C	C	C	C	C	C	C	C	C	C	C	C
11	102557232	mUNC20269305	G	G	G	G	G	G	G	G	G	G	G	A	A	A	A	A	H	G	G	G	G	H	G	G	G	G	H	A	H	H	A	G	G	G	G	G	G	G	G	G	G	G	G	G	G	H	H
11	103914044	SAC114156561	A	A	A	A	A	A	A	A	A	A	A	A	A	A	A	A	A	A	A	A	A	H	A	A	A	A	A	A	A	A	A	A	A	H	H	H	H	A	A	A	A	A	A	A	A	A	A
11	104507687	SS6114180307	C	C	C	C	H	H	H	C	C	C	H	C	C	C	C	C	C	H	C	C	H	H	H	H	H	H	C	C	C	C	C	C	H	C	C	C	C	C	C	C	C	C	C	H	H	H	H
11	104816537	UNC20299541	G	H	G	H	G	G	G	G	G	G	G	G	H	H	G	H	G	G	G	G	G	G	G	G	G	G	G	G	G	G	G	H	H	H	G	G	G	H	H	H	H	H	A	G	G	G	G
11	109529605	gUNC20359696	H	G	H	G	G	G	G	G	G	G	G	G	G	G	G	G	H	G	H	G	G	G	G	G	G	G	G	G	G	G	G	H	G	G	H	H	H	G	G	G	G	G	G	G	G	G	G
11	110687108	SFT114427484	H	C	C	H	H	H	H	C	H	C	C	H	H	C	T	C	C	C	C	H	C	H	H	H	C	C	C	C	C	C	C	C	C	H	H	H	H	C	C	C	C	C	C	C	H	C	C
11	116668021	S6T114666720	C	T	H	H	H	H	H	C	C	H	T	H	H	H	H	H	H	C	C	C	H	H	C	H	H	T	C	C	H	C	C	H	C	C	C	C	C	C	H	T	T	H	T	H	H	H	H
11	120306788	S6J114812271	C	C	C	C	C	C	C	C	C	H	H	H	C	C	H	C	T	H	H	H	T	C	C	C	H	C	H	C	T	C	H	C	C	C	C	C	C	C	C	H	C	H	H	H	T	C	C
11	121053580	S2T114842143	H	H	H	H	H	H	H	H	H	G	G	H	H	H	H	H	G	G	G	H	G	G	G	G	G	G	G	G	G	G	G	G	G	H	G	G	H	G	G	G	G	G	G	G	G	G	G
12	4717765	gJAX00032741	T	T	T	T	H	T	T	T	T	T	T	T	T	T	T	T	T	T	T	T	H	T	T	T	T	T	T	T	T	T	T	T	T	T	T	H	H	T	H	T	T	T	T	T	T	T	T
12	5961128	gB6_rs29158719	H	H	G	G	G	G	G	G	G	G	G	G	G	G	G	G	G	G	G	G	G	G	G	G	G	G	G	G	G	G	G	G	G	G	G	G	G	G	G	G	H	H	G	G	G	G	G
12	6216270	gJAX00324477	A	A	H	H	H	H	H	H	A	H	H	A	A	H	H	A	H	A	H	A	A	H	A	H	H	A	A	H	A	H	A	A	A	A	A	A	A	A	A	A	A	A	A	A	A	A	A
12	6444323	SAJ120257772	C	C	C	C	C	C	C	C	C	C	C	C	C	C	C	C	C	C	C	C	C	C	C	C	C	C	C	C	C	C	C	C	C	C	C	C	C	C	C	C	C	C	C	C	C	C	C
12	9834379	SBC120393375	C	C	C	C	C	C	C	C	C	C	C	C	C	C	C	C	C	C	C	C	C	C	C	C	C	C	C	C	C	C	C	C	C	C	C	C	C	C	H	C	C	C	C	C	C	C	C
12	9859324	SBR120394372	G	G	G	G	G	G	G	G	G	G	G	G	G	G	G	G	G	G	G	G	G	G	G	G	G	G	G	G	G	G	G	G	G	G	G	G	G	G	H	G	G	G	G	G	G	G	G
12	11777336	S6J120471093	H	H	G	G	G	G	G	G	G	G	G	H	G	G	G	G	G	G	G	G	G	G	G	G	G	G	G	G	G	G	G	H	H	H	H	G	G	G	G	H	G	G	H	H	G	G	G
12	13845488	gUNC20662364	C	C	C	C	C	C	C	C	C	C	C	C	C	C	C	C	C	C	C	C	C	C	C	C	C	C	H	C	H	C	H	C	C	C	C	C	C	C	C	C	C	C	C	C	C	C	C
12	13882365	SSR120555294	C	C	C	C	C	C	C	C	C	C	C	C	C	C	C	C	C	C	C	C	C	C	C	C	C	C	H	C	H	C	H	C	C	C	C	C	C	C	C	C	C	C	C	C	C	C	C
12	14574807	DNJ120582992	H	G	H	G	G	G	G	G	G	G	G	G	G	G	G	G	H	G	H	G	G	G	G	H	G	G	G	G	G	G	G	G	G	G	G	G	G	G	G	G	G	G	G	G	G	G	G
12	14849948	S1H120593997	H	T	H	T	T	T	T	T	T	T	T	T	T	T	T	T	H	T	H	T	T	T	T	H	T	T	T	T	T	T	T	T	T	T	T	T	T	T	T	T	T	T	T	T	T	T	T
12	15572746	gJAX00326602	C	C	C	C	C	C	C	C	C	C	C	C	C	C	C	C	C	C	C	C	C	C	C	C	C	C	H	H	C	H	C	C	C	C	C	H	H	H	C	C	H	C	C	C	C	C	C
12	16138017	SAH120645520	H	G	H	G	G	G	G	G	G	G	G	G	G	G	G	G	H	G	H	G	G	G	G	H	G	G	H	H	G	H	G	G	G	G	G	H	H	H	G	G	H	G	G	G	G	G	G
12	21257931	SAJ120850317	H	A	H	A	A	A	A	A	A	A	A	A	A	A	A	A	H	A	H	A	A	A	A	H	A	A	H	H	A	H	A	H	H	A	A	A	A	A	A	A	H	A	A	A	A	A	H
12	27923647	gUNC20783349	T	T	T	T	H	H	C	C	T	C	C	T	T	T	T	T	T	T	T	T	T	T	T	T	T	T	T	H	H	H	H	T	T	T	T	T	T	T	H	T	T	T	T	T	T	T	H
12	30305276	SS1121212211	C	H	H	H	C	C	C	C	H	C	C	C	C	C	C	C	C	H	C	C	C	T	T	C	T	H	C	H	H	H	H	C	C	C	C	C	C	C	C	C	C	C	C	C	H	H	T
12	32311109	gJAX00034627	G	G	G	G	G	G	H	H	G	H	H	G	G	G	G	G	H	G	H	G	G	G	G	H	G	G	G	G	G	G	G	H	H	G	G	G	G	G	G	G	G	G	G	G	G	G	G
12	37708586	mJAX00035022	A	A	A	A	A	A	A	A	A	A	A	A	A	A	A	A	A	A	A	H	H	A	A	A	A	A	A	H	A	H	H	A	A	H	H	A	A	H	A	A	A	A	A	A	A	A	A
12	41863291	S6J121674531	C	C	C	C	H	H	H	H	C	H	H	C	C	C	C	C	C	C	C	C	C	C	C	C	C	C	C	C	C	C	C	C	C	C	C	C	C	C	C	C	C	C	C	C	C	C	C
12	41930193	SFT121677207	G	G	H	H	G	G	G	G	G	G	G	G	G	H	H	G	G	G	G	G	G	G	G	G	G	G	G	G	G	G	G	G	G	G	H	H	H	H	G	G	G	G	G	G	G	G	G
12	47578460	gJAX00035764	C	C	C	C	C	C	C	C	C	C	C	C	C	C	C	C	C	C	C	C	C	C	C	C	C	C	C	C	C	C	C	C	C	C	H	H	H	H	C	C	C	C	C	C	C	C	C
12	55607147	SS1122224285	T	T	H	H	C	C	C	C	C	C	C	H	H	H	H	H	T	H	H	C	C	H	H	H	H	H	C	C	C	C	C	C	C	C	C	C	C	C	C	C	C	C	C	C	C	C	C
12	65219431	S2J122608777	C	C	C	C	H	C	C	C	H	C	C	C	C	C	C	C	C	C	C	C	C	C	C	C	C	C	C	C	C	C	C	H	H	C	C	H	H	C	A	H	H	H	H	H	H	H	H
12	67033689	UNC21309125	G	G	H	H	G	G	G	G	G	G	G	G	G	G	G	G	H	G	G	G	G	H	H	H	H	H	G	G	G	G	G	G	G	G	G	G	G	G	H	H	H	H	H	H	G	G	G
12	68372655	gJAX00336586	A	A	A	A	H	A	A	A	H	A	A	A	A	A	A	A	A	A	A	A	A	A	A	A	A	A	A	A	A	A	A	H	H	A	A	H	H	A	H	A	A	A	A	A	H	H	H
12	70285253	S2T122811410	G	G	H	H	G	G	G	G	G	G	G	G	G	G	G	G	G	G	G	G	G	G	G	G	G	G	G	G	G	G	G	G	G	G	G	G	G	G	H	H	H	H	H	H	G	G	G
12	70300462	JAX00037459	G	G	H	H	G	G	G	G	G	G	G	G	G	G	G	G	G	G	G	G	G	G	G	G	G	G	G	G	G	G	G	G	G	G	G	G	G	G	H	H	H	H	H	H	G	G	G
12	85168978	gJAX00038569	C	C	C	C	C	C	C	C	C	C	C	C	C	C	C	C	C	C	C	C	C	C	C	C	C	C	C	C	C	C	C	C	C	C	C	C	C	C	C	C	C	C	C	C	C	C	C
12	86159105	SAJ123446364	G	G	G	H	G	H	G	G	G	G	G	G	G	G	G	G	H	G	G	G	G	H	G	H	H	H	G	G	G	G	G	H	H	A	H	H	A	H	A	H	H	H	H	H	G	G	G
12	88433531	gJAX00340772	G	G	G	G	G	G	G	G	G	G	G	G	H	H	H	H	H	H	G	G	H	G	G	G	G	G	G	G	G	G	G	G	G	G	G	G	G	G	G	G	G	G	G	G	G	G	G
12	89802664	SNJ123592106	A	A	A	A	A	A	A	A	A	H	H	A	A	A	A	A	A	A	A	A	H	A	A	A	A	A	A	A	A	A	A	A	A	H	A	A	H	A	A	A	A	A	A	H	A	A	A
12	93818685	SS1123752747	H	H	G	H	A	A	A	A	A	A	A	A	A	A	A	A	A	A	A	A	H	A	A	A	A	A	H	H	A	H	H	H	H	H	A	A	A	H	H	A	A	A	A	A	A	A	A
12	102666525	gUNC21771945	A	A	A	A	A	A	A	A	A	A	A	A	A	A	A	A	A	A	A	A	A	A	A	A	A	A	A	H	A	H	H	H	A	A	A	A	A	A	A	A	A	A	A	A	A	A	A
12	103654480	gJAX00039918	G	G	G	G	H	H	H	H	H	G	G	G	G	G	G	G	H	H	H	G	G	G	H	H	G	G	G	G	G	G	G	G	G	G	G	G	G	G	H	G	G	G	G	G	H	G	H
12	106833655	S6J124273346	C	C	C	C	C	C	C	C	C	C	C	C	C	H	C	C	C	C	C	C	C	C	C	C	C	C	H	H	H	H	H	C	C	C	C	C	C	C	C	C	C	C	C	C	H	H	H
12	107962187	SAJ124318487	G	G	H	H	H	G	G	G	G	H	A	G	G	G	G	G	G	H	H	G	G	H	H	H	H	G	G	G	G	G	G	G	G	G	G	G	G	G	G	G	G	G	G	G	G	G	G
12	111875479	S2T124475019	C	C	H	T	H	C	H	H	H	H	H	C	C	C	C	C	H	C	C	C	C	C	C	C	C	C	C	C	C	C	C	C	H	C	C	C	C	C	C	C	C	C	C	C	C	C	C
12	118332825	SAJ124733313	A	A	H	H	H	A	H	H	H	H	A	A	A	A	A	A	H	A	A	A	A	A	A	A	A	A	A	A	A	A	A	A	A	A	H	H	A	H	A	A	A	H	H	H	H	G	H
12	119378890	SAJ124775155	C	C	H	H	H	C	H	H	H	H	C	C	C	C	C	C	H	C	C	C	C	C	C	C	C	C	C	C	C	C	C	C	C	C	H	H	C	H	C	C	C	H	H	H	H	T	H
13	6304055	gB6_rs13481676	G	G	G	G	G	G	G	G	G	G	G	G	G	G	G	G	G	H	H	G	H	H	H	H	H	H	G	G	G	G	G	H	H	H	H	H	G	G	G	G	G	G	G	G	G	H	H
13	11087170	DNJ130443486	T	T	T	T	H	T	T	T	H	H	H	H	H	H	H	H	T	H	H	T	H	T	T	T	T	T	T	T	T	T	T	H	H	T	T	T	H	H	T	T	T	T	T	T	T	T	T
13	11491322	B10130011491	G	G	G	G	H	G	G	G	H	H	H	H	H	H	H	H	G	H	H	G	H	G	G	G	G	G	G	G	G	G	G	H	H	G	G	G	H	H	G	G	G	G	G	G	G	G	G
13	13268590	gUNC22143106	H	A	A	A	G	H	H	H	H	G	G	H	H	G	G	G	G	G	G	G	G	G	G	G	G	G	H	H	G	H	G	G	G	G	G	G	G	G	G	G	G	G	G	G	G	H	H
13	18764095	S6J130750563	G	G	G	G	G	H	G	G	G	G	G	H	G	G	G	G	H	G	G	G	G	G	H	H	H	G	G	G	G	G	G	G	G	G	G	G	H	H	G	G	H	G	G	H	G	G	G
13	25131524	gJAX00352895	C	H	H	H	C	C	C	C	C	C	C	C	C	C	C	C	C	H	H	H	C	C	H	H	C	H	H	C	H	H	C	C	C	C	C	C	C	C	T	H	C	H	H	C	C	C	C
13	27045522	gUNC22312523	C	C	C	C	C	C	H	H	C	H	H	C	C	C	C	C	C	C	C	C	C	C	C	C	C	C	C	C	H	C	H	C	C	C	C	H	H	H	C	C	C	C	C	C	C	C	C
13	28960442	S6J131158417	G	G	G	G	G	G	G	G	G	G	G	G	G	G	G	G	G	G	G	G	G	G	G	G	G	G	H	G	G	H	G	G	G	G	G	G	H	H	G	G	H	G	G	H	G	G	G
13	31277921	SS1131251116	C	C	C	C	H	H	H	H	H	H	H	C	C	C	C	C	C	C	C	C	C	C	C	C	C	C	H	H	H	C	H	C	C	C	C	H	H	H	C	C	C	C	C	C	C	C	H
13	31406993	S6R131256279	G	H	H	H	A	A	A	A	A	A	A	H	H	G	G	G	H	A	A	H	A	H	H	H	H	H	A	A	A	A	A	A	A	A	A	A	A	A	H	A	A	A	A	A	A	H	H
13	32641487	SS1131305659	C	C	C	C	H	H	H	H	H	H	H	C	C	C	C	C	C	C	C	C	C	C	C	C	C	C	H	H	H	C	H	C	C	C	C	C	C	C	C	C	C	C	C	C	C	C	H
13	42649675	SS1131705987	G	G	G	G	H	G	G	G	H	H	H	G	G	G	G	G	G	G	G	G	G	G	G	G	G	G	G	G	G	G	G	G	G	G	G	G	G	G	H	G	G	G	G	G	H	G	G
13	43525979	SS1131741039	C	C	C	C	H	C	C	C	H	H	H	C	C	C	C	C	C	C	C	C	C	C	C	C	C	C	C	C	C	C	C	C	C	C	C	C	C	C	C	C	H	H	C	H	H	C	C
13	46369428	gJAX00044326	H	H	H	H	A	H	A	A	A	A	A	A	A	A	A	A	H	H	H	A	G	H	A	A	H	H	A	A	A	A	A	A	A	A	H	H	H	H	A	A	A	A	A	A	H	H	A
13	49893568	mUNC22576910	G	G	G	G	G	G	G	G	G	G	G	H	H	H	H	H	G	G	H	G	G	G	G	G	G	G	G	G	G	G	G	G	G	G	G	G	G	G	G	G	H	H	H	H	G	G	G
13	51073001	SAJ132042920	G	H	H	H	G	G	G	G	G	G	G	H	G	G	G	G	G	G	G	G	G	G	G	G	G	G	G	H	G	H	G	G	G	H	G	G	G	G	H	G	G	G	G	G	H	G	G
13	51260011	gJAX00044692	H	C	C	C	C	C	C	C	C	H	H	C	C	C	C	C	H	H	H	H	C	C	H	H	C	C	C	C	C	H	H	C	C	C	C	C	C	C	C	C	C	C	C	C	C	C	C
13	52316488	B10130052316	C	C	C	C	H	H	H	H	H	H	H	C	C	C	C	C	C	C	C	C	C	C	C	C	C	C	C	C	C	C	C	H	H	C	C	C	C	C	C	H	C	C	H	C	C	C	C
13	54568807	S6J132182752	G	G	G	G	G	G	H	G	G	G	G	G	G	G	G	G	H	H	G	G	A	H	G	G	H	H	H	H	H	H	G	G	G	G	G	G	G	G	G	G	H	H	G	H	H	H	G
13	60657476	gJAX00360429	C	H	H	H	H	C	C	C	C	C	C	C	C	C	C	C	C	C	C	H	H	H	C	C	H	H	C	H	C	H	H	C	C	C	C	C	C	C	C	H	C	C	H	C	H	H	C
13	67281090	SSH132691243	A	H	H	H	H	A	H	A	A	A	A	A	A	A	A	A	A	A	A	H	H	H	A	A	H	H	A	H	A	H	H	A	A	A	A	A	A	A	A	H	A	A	H	A	H	H	A
13	71259859	UNC22823661	A	A	A	A	A	A	A	A	A	A	A	A	A	A	A	A	A	A	A	A	A	A	A	A	A	A	H	H	H	A	H	A	A	A	A	A	A	A	G	H	H	A	A	A	A	A	A
13	77868563	SFR133114742	G	G	G	G	G	G	G	G	G	G	G	G	G	G	G	G	G	G	G	G	G	G	G	G	G	G	G	G	G	G	G	G	G	H	G	G	G	G	G	G	G	G	G	G	G	G	G
13	79435664	SS1133177426	C	C	C	C	C	C	C	C	C	C	C	C	C	C	C	C	C	C	C	C	C	C	C	C	C	C	H	H	H	C	H	C	C	C	H	H	H	H	H	H	H	C	C	C	C	C	C
13	81919647	gUNC22955018	G	G	G	G	G	G	G	G	G	G	G	H	G	H	G	G	G	G	G	A	G	H	G	G	H	H	G	G	G	G	G	H	G	G	H	H	H	G	H	G	H	H	G	H	G	G	G
13	82916083	S6J133316643	H	C	C	C	H	H	C	H	H	H	H	T	T	T	H	H	H	H	H	T	H	H	H	H	H	H	T	T	T	T	T	T	T	T	T	T	T	T	T	T	H	H	T	H	H	H	H
13	85572012	S3C133422880	C	C	C	C	C	C	C	C	C	C	C	H	C	H	H	H	C	C	C	H	C	H	C	C	H	H	C	C	C	C	C	H	C	C	H	H	H	C	H	H	H	C	C	C	C	H	H
13	88269893	gJAX00203610	H	G	G	G	G	G	G	G	G	G	G	G	G	G	G	G	G	G	G	G	G	G	G	G	G	G	G	G	G	G	G	G	G	G	G	G	G	G	H	H	G	G	H	G	G	G	G
13	93191709	S6J133727668	H	H	H	H	C	C	C	C	C	C	C	H	H	H	C	C	C	C	C	C	C	H	H	H	H	H	C	C	C	C	C	C	C	H	C	C	C	C	C	C	C	C	C	C	C	C	C
13	93918354	S6J133756734	H	H	H	H	C	C	C	C	C	C	C	H	H	H	C	C	C	C	C	C	C	H	H	H	H	H	C	C	C	C	C	C	C	H	C	C	C	C	H	H	H	C	C	C	H	H	H
13	95133961	S6J133805358	H	H	H	H	T	T	T	T	T	T	T	H	H	H	T	T	T	T	T	T	T	H	H	H	H	H	T	T	T	T	T	T	T	H	T	T	T	T	H	H	H	T	T	T	T	T	T
13	102893320	SAH134115732	H	H	C	H	C	C	C	C	H	H	H	C	H	C	H	H	C	C	C	C	C	C	C	C	C	C	H	H	H	C	H	H	H	C	C	C	C	C	C	C	C	C	C	C	H	H	H
13	103083702	S1L134123348	G	G	G	G	G	G	G	G	G	G	G	T	H	T	H	H	H	H	G	H	G	G	G	G	G	G	H	G	H	G	G	G	H	H	H	H	H	T	H	H	H	H	H	H	G	G	G
13	103262057	B10130103262	A	A	A	A	H	H	H	A	A	A	A	A	A	A	A	A	H	H	H	A	A	A	A	A	A	A	H	H	H	H	H	A	A	A	A	A	A	A	A	A	A	A	A	A	H	A	A
13	104014854	S3R134160594	G	G	G	G	G	G	G	G	G	G	G	A	H	A	H	H	H	H	G	H	G	G	G	G	G	G	H	G	H	G	G	G	H	H	H	H	H	A	H	G	G	H	H	H	G	G	G
13	106438653	S1L134257546	T	T	H	T	H	H	H	H	H	H	H	T	H	T	H	H	T	T	T	T	H	T	T	T	T	T	T	T	T	T	T	H	H	T	H	H	H	H	H	H	T	T	H	T	T	H	H
13	107529299	SFT134301171	H	H	H	H	C	C	C	C	C	C	C	C	C	C	C	C	C	C	H	C	C	C	C	C	C	C	C	C	C	C	C	C	C	C	C	C	C	C	C	T	T	H	H	H	H	H	H
13	107872088	gUNC23316798	H	H	H	H	C	C	H	C	C	C	C	C	C	C	C	C	H	H	T	C	C	C	C	C	C	C	C	C	C	C	C	C	C	C	C	C	C	C	C	T	T	H	H	H	H	H	H
13	110348132	S1J134413925	T	T	T	T	T	T	T	T	T	T	T	T	T	T	T	T	T	T	T	T	T	T	T	T	T	T	T	T	T	T	T	T	T	T	T	T	T	T	T	T	T	T	T	T	T	T	T
13	110353400	S1L134414136	A	A	A	A	A	A	A	A	A	A	A	A	A	A	A	A	A	A	A	A	A	A	A	A	A	A	A	A	A	A	A	A	A	A	A	A	A	A	A	A	A	A	A	A	A	A	A
13	110362300	S1J134414492	G	G	G	G	G	G	G	G	G	G	G	G	G	G	G	G	G	G	G	G	G	G	G	G	G	G	G	G	G	G	G	G	G	G	G	G	G	G	G	G	G	G	G	G	G	G	G
13	110678029	SBC134427121	H	H	G	H	G	G	G	G	G	G	G	G	H	G	H	H	H	H	H	H	H	G	G	G	G	H	T	H	H	G	H	G	H	H	T	H	H	T	G	G	G	H	H	H	G	H	H
13	111989437	DNJ134479577	G	G	G	G	G	G	G	G	G	G	G	G	G	G	G	G	G	G	G	G	H	H	T	T	H	G	G	G	G	G	G	G	G	G	G	G	G	G	G	G	G	G	G	G	G	G	G
13	115839893	S6J134633595	C	C	C	C	C	C	C	C	C	C	C	C	C	C	C	C	C	C	C	C	C	C	C	C	C	C	C	C	C	C	C	H	H	T	H	H	H	H	C	C	C	C	C	C	C	C	C
13	116119640	UNC23451375	G	G	H	G	G	G	H	G	G	H	G	G	G	G	G	G	G	G	G	G	G	G	G	G	G	G	G	G	G	G	G	G	G	G	G	G	G	G	H	H	H	H	A	H	H	G	H
14	8249135	gJAX00049833	H	G	H	H	G	G	G	G	G	G	G	G	G	G	G	G	G	G	G	H	H	G	G	G	G	G	G	H	H	H	H	G	G	G	G	G	G	G	H	G	G	G	G	G	G	G	G
14	9493214	SX1140379728	A	A	A	A	A	A	A	A	A	A	A	H	A	A	A	A	A	A	A	A	A	A	A	A	A	A	A	A	A	A	A	A	A	A	A	A	A	A	A	A	A	A	A	A	A	A	A
14	9988745	gJAX00372622	T	H	T	T	T	H	C	C	H	H	C	C	H	H	C	C	C	H	C	C	C	H	H	H	H	H	C	C	C	C	C	H	H	C	C	H	H	C	T	H	T	T	H	H	T	C	C
14	16132318	SSH140645292	G	G	G	G	G	G	G	G	G	G	G	H	G	G	G	G	G	G	G	G	G	G	G	G	G	G	G	G	G	G	G	G	G	G	G	G	G	G	G	G	G	G	G	G	G	G	G
14	22556300	S6J140902252	C	H	C	C	C	C	T	T	H	H	T	C	C	C	C	C	C	C	C	H	H	C	C	C	C	C	C	C	C	C	C	T	H	C	H	T	T	H	H	H	C	H	C	C	C	H	H
14	27323760	SFJ141092950	G	G	G	H	G	G	G	G	G	G	G	G	G	G	G	G	H	H	H	H	H	G	H	H	H	H	G	G	G	G	G	G	G	G	G	G	G	G	G	G	G	G	G	G	G	G	G
14	29456686	DAJ141178267	H	C	H	H	C	C	C	C	C	C	C	C	H	H	C	C	C	C	C	C	C	C	C	C	C	C	C	C	C	C	C	C	C	C	C	C	C	C	H	C	C	C	C	C	C	C	C
14	30656998	S6J141226279	H	H	H	C	C	C	T	T	H	T	T	C	C	C	C	C	C	C	C	H	H	H	C	H	C	C	C	C	C	C	C	H	C	C	H	H	H	H	C	C	C	C	C	C	C	C	C
14	33045890	gJAX00376896	C	C	C	H	C	C	C	C	C	C	C	C	H	H	H	H	C	H	C	C	C	C	C	C	C	C	C	C	C	C	C	H	H	C	C	H	H	C	C	C	C	H	C	C	C	H	H
14	36479449	S6J141459177	G	G	G	G	G	G	G	G	G	G	G	G	G	G	G	G	G	G	G	G	G	G	H	G	G	H	G	H	G	H	G	H	H	H	H	H	H	H	G	G	G	G	G	G	G	G	G
14	47030516	S6H141881220	H	C	H	T	H	H	H	H	H	H	C	C	H	C	H	C	H	H	C	H	H	C	C	C	C	C	C	C	H	C	H	C	C	C	C	C	C	C	H	C	C	H	C	C	H	C	C
14	48567426	S6T141942697	H	C	H	T	C	C	H	H	H	H	C	C	H	C	H	C	H	H	C	H	H	C	H	C	C	H	C	C	H	C	H	C	C	C	C	C	C	C	H	C	C	H	C	C	H	C	C
14	49004754	gUNC23979521	G	G	G	G	G	G	G	G	G	G	G	G	G	G	G	G	G	G	G	G	G	G	G	G	G	G	G	G	G	G	G	G	G	G	G	G	G	G	G	H	H	G	G	H	G	G	G
14	51400440	mUNC140923270	H	T	H	G	H	H	H	H	H	H	T	T	H	T	H	T	H	H	T	H	H	H	H	T	T	H	G	H	G	H	G	T	T	T	T	T	T	T	T	T	T	H	H	T	H	T	T
14	54805377	mUNC140448070	H	T	H	H	T	T	H	H	H	H	T	T	H	T	H	T	H	H	T	H	H	H	H	H	H	H	T	T	H	T	H	T	T	T	T	T	T	T	T	T	T	H	H	T	G	T	T
14	55663092	S6J142226523	H	C	H	H	C	C	H	H	H	H	C	C	H	C	H	C	H	H	C	H	H	H	H	H	H	H	C	C	H	C	H	C	C	C	C	C	C	C	C	C	C	H	H	C	H	C	C
14	56229596	gJAX00053250	T	T	T	T	T	T	T	T	T	T	T	T	T	T	T	T	T	T	T	T	T	T	T	T	T	T	T	T	T	T	T	T	T	T	T	T	T	T	T	T	T	T	T	T	H	T	T
14	60403193	gUNC24075003	H	G	G	H	H	H	G	G	G	G	G	G	H	G	H	G	A	A	H	H	H	H	H	H	H	H	G	G	G	G	G	G	G	G	H	G	G	G	G	G	G	G	G	G	H	G	G
14	64136127	mUNC140221618	T	T	T	T	T	T	T	T	T	T	H	T	T	T	T	T	T	T	T	H	H	H	T	T	T	H	T	T	T	T	T	T	T	T	T	T	T	T	H	T	T	H	H	T	T	T	T
14	70082502	S6J142803300	H	C	H	C	H	H	H	T	H	T	T	C	C	C	C	C	C	C	C	C	C	H	H	H	H	H	C	C	C	C	C	C	C	C	C	C	C	C	H	C	C	C	C	C	C	C	C
14	73673043	gJAX00383888	C	C	C	C	H	H	H	H	H	H	H	T	H	T	H	T	C	C	C	C	H	C	C	C	C	C	H	C	C	C	C	C	C	H	C	C	H	C	C	H	C	H	C	C	C	C	C
14	78253307	SAC143130132	G	G	G	G	G	G	G	G	G	G	G	G	G	G	G	G	G	G	G	G	G	G	G	G	G	G	G	G	G	G	G	G	G	G	G	G	G	G	G	G	G	G	G	G	G	G	G
14	80885472	SS1143235418	C	C	C	C	C	C	C	C	C	C	C	C	H	C	H	C	T	H	C	H	H	H	C	C	H	H	C	C	C	C	C	H	H	C	H	H	C	H	H	C	C	C	C	C	H	H	H
14	86099925	SS1143443997	G	G	G	G	G	G	G	G	G	G	G	G	H	G	H	G	T	H	H	H	H	H	G	G	H	H	G	G	G	G	G	G	G	G	G	G	G	G	H	G	G	G	G	G	G	T	H
14	91480983	S6J143659239	G	G	G	G	H	H	G	G	G	G	G	H	H	H	H	H	H	T	T	G	G	G	H	H	G	G	G	G	G	G	G	G	G	G	G	G	G	G	T	G	H	G	H	H	H	H	H
14	95161542	SS1143806461	H	G	G	G	G	G	H	T	H	T	H	G	G	G	G	G	G	G	G	G	G	G	G	G	G	G	G	G	G	G	G	T	H	H	H	T	H	H	G	G	G	G	G	G	G	H	G
14	104875492	SFT144195019	A	A	A	A	A	A	A	A	A	A	A	A	A	A	A	A	A	A	A	A	A	A	A	A	A	A	A	A	A	A	A	A	A	A	A	A	A	A	A	H	A	H	A	A	A	H	A
14	107352663	S2R144294106	T	T	T	T	H	T	T	T	T	T	T	H	H	H	H	H	H	T	T	G	H	H	H	H	G	H	T	T	T	H	H	T	T	T	T	T	H	T	T	T	T	T	T	T	T	T	T
14	108806799	gJAX00389449	H	T	T	T	C	C	C	C	C	C	C	C	C	C	C	C	C	C	C	C	C	C	C	C	C	C	H	C	C	H	H	C	C	C	C	C	C	C	C	C	H	C	C	C	C	C	C
14	118858771	SS1144754350	H	H	C	C	C	C	C	H	C	H	C	C	C	C	C	C	C	C	C	H	C	C	H	C	H	C	C	C	C	C	C	H	H	H	H	H	C	H	C	H	C	H	C	C	H	H	H
14	121326790	SAJ144853071	G	G	G	G	H	G	G	G	G	G	G	H	G	H	H	H	H	A	A	H	G	H	A	A	H	H	H	G	G	G	H	G	H	G	G	G	G	G	G	G	H	G	G	G	G	H	G
14	123368613	SFT144934744	G	G	G	G	H	H	H	G	H	G	H	H	H	H	H	H	H	H	H	G	G	H	G	H	G	G	H	G	G	G	H	G	G	G	G	G	G	G	H	G	H	G	G	G	G	G	G
14	124455833	S6J144978233	G	G	H	H	G	G	G	H	G	H	G	G	G	G	G	G	G	G	G	G	G	G	G	G	G	G	G	G	G	H	H	G	H	G	G	G	H	G	G	G	G	G	G	G	H	H	G
15	5101515	DNJ150204060	C	C	C	C	H	H	C	C	C	C	C	C	C	C	C	C	C	C	C	H	C	H	C	C	H	C	C	C	C	C	C	C	C	H	H	H	H	H	C	C	C	C	H	H	H	H	C
15	17197511	SS1150687900	G	G	G	G	G	G	G	G	G	G	G	H	G	G	H	H	G	G	G	G	G	G	G	G	G	G	G	G	G	G	G	G	G	G	G	G	G	G	G	G	G	G	G	G	G	G	G
15	18630296	S6J150745211	C	C	C	C	C	C	C	C	C	C	C	C	C	C	C	C	H	T	T	C	C	C	H	H	C	H	C	C	C	C	C	H	C	C	C	C	C	C	C	C	C	C	C	C	C	C	C
15	24380441	S6J150975217	G	G	G	G	G	G	G	G	G	G	G	G	G	G	G	G	G	G	G	G	G	G	G	G	G	G	H	H	G	H	H	H	G	G	G	G	G	G	G	G	G	G	G	G	H	H	G
15	32565669	SAC151302626	G	G	G	G	G	G	G	G	G	G	G	G	G	G	G	G	G	G	G	G	G	G	G	G	G	G	H	H	G	H	H	G	G	G	G	G	G	G	G	G	G	G	G	G	H	H	G
15	36416331	SSH151456653	T	T	T	T	T	T	T	T	T	T	T	H	H	H	H	T	H	T	T	H	H	T	T	T	T	T	H	H	H	H	H	H	T	H	H	H	T	T	T	H	T	T	T	H	H	H	C
15	37997617	SNJ151519904	A	A	A	A	A	A	A	A	A	A	A	A	A	A	A	A	A	A	A	A	A	A	A	A	A	A	A	A	A	A	A	H	H	A	A	A	A	A	A	A	A	A	A	A	A	A	A
15	39930002	S3C151597200	A	H	A	H	A	A	H	H	H	A	A	A	A	A	A	H	A	A	A	A	A	A	A	A	A	A	A	A	A	A	A	A	A	A	A	A	A	A	H	A	A	A	A	A	H	A	A
15	41538731	B10150041538	C	C	C	C	C	C	C	C	C	C	C	C	C	C	C	C	C	H	H	C	C	H	H	H	H	H	C	C	C	C	C	C	C	C	C	C	C	C	C	C	C	C	C	C	C	C	H
15	41845917	S6Y151673836	C	C	H	H	C	C	C	C	C	H	H	C	C	C	C	C	H	C	C	H	H	C	C	C	C	C	H	H	C	C	H	C	C	T	T	T	C	H	H	H	T	T	H	H	C	H	H
15	48408772	SAJ151936350	C	C	C	C	C	C	T	T	T	C	C	C	C	C	C	C	C	C	C	C	C	C	C	C	C	C	C	C	C	C	C	C	C	C	C	C	C	C	C	C	C	C	C	C	C	C	C
15	50326835	SS1152013073	A	A	A	A	A	A	A	A	A	A	A	A	A	A	A	A	A	A	A	A	A	A	A	A	A	A	A	A	H	A	A	A	A	A	A	A	A	A	A	A	A	A	A	A	A	A	A
15	51320608	S3C152052824	H	H	H	H	G	G	G	G	G	G	G	G	G	G	G	H	G	G	G	G	G	G	G	G	G	G	G	G	G	G	G	G	G	G	G	G	G	G	G	G	G	G	G	G	G	G	G
15	56697769	DZO152267910	G	G	H	H	G	G	G	G	G	G	G	G	G	G	G	G	G	G	G	G	G	G	G	G	G	G	G	G	G	G	G	H	H	G	G	G	G	G	H	H	G	G	H	G	G	G	G
15	62232131	S3C152489285	H	C	A	H	A	A	H	H	H	A	A	A	A	A	A	A	A	A	A	A	A	H	A	A	A	A	A	A	A	A	A	A	A	C	C	C	A	H	A	A	H	H	H	A	A	A	A
15	67316287	SAJ152692651	G	G	G	G	G	G	G	G	G	G	G	G	G	G	G	G	H	H	H	G	G	G	H	H	G	H	G	G	G	G	G	G	H	G	G	G	H	H	G	G	G	G	G	G	G	G	G
15	74229051	SAJ152969162	G	G	G	G	G	G	G	G	G	G	G	G	G	G	G	G	G	G	G	G	G	G	G	G	G	G	G	G	G	G	G	G	G	G	G	G	G	G	G	G	G	G	G	G	G	G	H
15	75180504	mUNC25899852	G	G	G	G	H	A	H	H	H	H	H	G	H	H	H	A	G	H	H	G	G	G	H	H	H	H	G	G	G	G	G	G	G	G	G	G	G	G	G	G	G	G	G	G	G	G	G
15	77789609	gUNC25926370	H	H	H	H	G	G	G	G	G	G	G	H	G	G	G	G	G	H	G	H	H	G	G	G	G	G	H	H	H	H	H	G	A	G	G	G	H	H	G	G	H	H	H	H	G	H	H
15	78524073	S6H153140962	C	C	C	C	C	C	C	C	C	C	C	H	C	C	C	C	C	H	C	H	H	C	C	C	C	C	C	C	C	C	C	C	H	C	C	C	H	H	C	C	C	C	C	C	C	H	T
15	79847837	S1L153193913	C	C	H	H	A	A	A	H	A	H	A	A	A	A	A	A	A	A	A	A	A	A	A	A	A	A	H	H	A	A	H	A	A	A	A	A	A	A	A	A	A	A	A	A	A	A	A
15	80435943	S3T153217437	G	G	G	G	G	H	G	G	G	G	G	G	G	G	G	G	A	G	H	G	G	G	H	H	G	H	G	G	G	G	G	G	G	H	H	H	H	H	G	G	G	G	G	G	G	G	H
15	83969903	S6J153358796	C	C	C	C	C	C	C	C	C	C	C	C	C	C	C	C	C	H	C	C	C	H	C	C	C	H	C	C	C	C	C	C	C	C	C	C	C	C	C	H	C	H	H	C	H	H	C
15	83982814	S6J153359312	C	C	C	C	C	C	C	C	C	C	C	C	C	C	C	C	C	H	C	C	C	H	C	C	C	H	C	C	C	C	C	C	C	C	C	C	C	C	C	H	C	H	H	C	H	H	C
15	85460255	S6J153418410	A	A	A	A	A	A	A	A	A	A	A	H	H	H	H	A	A	A	A	A	A	H	A	A	A	H	A	A	A	A	A	A	A	A	A	A	A	A	A	H	A	H	H	A	A	H	H
15	86363336	S6J153454533	G	G	G	G	G	G	G	G	G	G	G	H	H	H	H	G	G	G	G	G	G	G	G	G	G	G	G	G	G	G	G	G	G	G	G	G	G	G	G	H	G	H	H	G	G	H	H
15	89321576	mUNC26072862	C	C	C	C	C	C	C	C	C	C	C	C	C	C	C	C	T	C	H	H	H	C	C	H	C	H	C	C	H	C	H	C	C	H	H	H	H	H	H	H	H	C	C	H	C	C	C
15	91927129	SX1153677085	A	A	A	A	A	A	A	A	A	A	A	A	A	A	A	A	A	A	A	A	A	H	H	H	H	H	A	A	A	A	A	C	A	A	A	A	A	A	A	A	A	A	A	A	A	A	A
15	93426575	UNC26133218	H	H	H	H	T	H	C	H	H	H	C	C	C	C	C	C	C	C	C	H	H	H	H	H	H	H	C	C	C	C	C	H	C	C	C	C	C	C	C	C	C	C	C	C	C	C	C
15	94547873	UNC26148022	G	G	G	G	H	H	G	G	G	G	G	G	H	H	H	H	G	G	G	G	H	H	H	H	G	H	G	G	G	G	G	G	G	G	G	G	G	G	G	G	G	G	G	G	H	H	H
15	94807373	SX1153792294	A	A	A	A	H	H	A	A	A	A	A	A	H	H	H	H	A	A	A	A	A	H	H	H	A	H	A	A	A	A	A	A	A	A	A	A	A	A	A	A	A	A	A	A	H	H	H
15	95486815	UNC26161152	A	A	A	A	H	H	A	A	A	A	A	A	H	H	H	H	A	A	A	A	A	H	H	H	A	H	A	A	A	A	A	A	A	A	A	A	A	A	H	H	H	A	A	A	H	H	H
15	97904670	SX1153916186	H	H	H	H	H	C	C	C	C	C	C	C	C	C	C	C	C	C	C	H	C	C	C	H	H	C	C	C	C	C	C	C	H	C	C	C	C	C	C	C	C	H	H	H	H	H	H
15	98653628	SFJ153946145	G	G	G	G	G	G	G	H	H	H	H	H	H	H	H	H	G	H	H	G	G	H	H	G	G	H	G	G	G	G	G	H	H	H	H	H	H	H	H	G	G	G	G	G	H	H	H
15	99345813	SAC153973832	G	G	G	G	G	G	G	G	G	G	G	G	G	G	G	G	G	G	G	G	G	G	G	G	G	G	G	G	H	G	H	G	G	G	G	G	G	G	G	G	G	G	G	G	G	G	G
15	99744198	SSH153989767	G	G	G	G	G	G	G	H	H	H	H	G	G	G	G	G	G	G	G	G	G	G	G	G	G	G	G	G	G	G	G	G	G	G	G	G	G	G	G	G	G	G	G	G	G	G	G
15	99806401	SS1153992256	T	T	T	T	T	T	T	H	H	H	H	T	T	T	T	T	T	T	T	T	T	T	T	T	T	T	T	T	T	T	T	T	T	T	T	T	T	T	T	T	T	T	T	T	T	T	T
15	100705895	mUNC26221559	H	H	C	C	H	C	C	C	C	C	C	C	C	C	C	C	C	H	H	H	H	H	H	H	H	H	C	C	C	C	C	C	C	C	C	C	C	C	C	C	C	C	C	H	H	H	H
16	7015367	gUNC26285827	H	A	H	A	A	A	H	A	H	A	H	A	A	A	A	A	H	A	A	A	A	A	A	A	A	A	A	A	A	A	A	A	A	H	H	H	H	H	A	H	H	A	A	H	A	A	A
16	7493520	SAH160299740	T	T	T	T	H	H	H	T	T	T	T	T	T	T	T	T	T	T	T	T	T	T	T	T	T	T	T	T	T	T	T	T	T	T	T	T	T	T	T	T	T	T	T	T	T	T	T
16	9877455	gJAX00413628	G	G	G	G	H	H	H	G	G	G	G	G	G	G	G	G	G	G	G	G	G	G	G	G	G	G	G	G	G	G	G	G	G	G	G	G	G	G	G	G	G	G	G	G	G	G	G
16	17265558	gJAX00414927	T	T	T	T	T	T	T	T	T	T	T	T	H	H	H	T	T	T	T	T	H	T	H	T	T	T	T	T	T	T	T	T	T	H	H	H	H	H	H	H	T	T	H	H	T	T	T
16	17650708	SAC160706028	C	C	C	C	C	C	C	C	C	C	C	C	C	C	C	C	C	C	C	C	C	C	C	C	C	C	C	H	C	H	C	C	C	C	C	C	C	C	C	C	C	C	C	C	C	C	C
16	20239118	gUNC26436075	C	C	C	C	C	C	C	C	C	C	C	C	C	C	C	C	C	C	C	C	C	C	C	C	C	C	C	H	C	H	C	C	C	C	C	C	C	C	C	C	C	C	C	C	C	C	C
16	21252983	SNJ160850119	C	C	C	C	C	C	C	C	C	C	C	H	H	C	H	H	C	C	C	C	H	C	H	C	C	C	C	C	C	H	H	C	C	C	C	C	C	C	C	C	C	C	C	C	C	C	C
16	23157640	S3J160926305	H	H	H	H	C	C	C	C	C	C	C	C	C	H	C	C	C	C	H	C	C	C	C	H	C	H	C	C	C	C	C	T	H	C	H	H	C	C	C	H	C	H	H	C	C	H	H
16	24294535	SS1160971781	H	C	C	C	H	H	T	H	H	H	H	H	T	H	T	H	C	C	C	C	H	C	H	C	C	C	C	H	C	H	C	C	H	T	H	H	T	T	H	H	H	C	H	T	H	C	H
16	26057468	gJAX00416106	H	C	C	H	C	C	C	C	C	C	C	C	C	H	C	C	C	C	C	C	C	C	C	C	C	C	C	C	C	C	C	C	C	C	C	C	C	C	H	C	C	C	C	C	C	C	C
16	26891622	SS1161075664	C	C	C	C	C	C	H	C	C	H	H	H	T	H	T	H	C	C	C	C	H	C	H	C	C	C	C	H	C	H	C	C	H	T	H	H	T	T	H	C	H	C	C	H	H	C	H
16	31752397	SX1161270095	G	G	G	G	G	G	G	G	G	H	H	G	G	G	G	G	G	G	G	G	H	G	H	G	G	G	G	H	G	H	H	G	G	G	G	G	G	G	G	G	G	G	G	G	G	G	G
16	31986551	gJAX00417318	A	A	A	A	A	A	A	A	A	A	A	A	A	A	A	A	A	A	A	A	A	A	A	A	A	A	A	A	A	A	A	A	A	A	A	A	A	A	A	A	A	A	A	A	H	H	A
16	32021143	S3R161280845	C	C	C	C	C	C	C	C	C	C	C	H	H	C	H	H	H	C	H	C	C	C	C	C	C	C	C	C	C	C	C	H	H	H	H	H	H	H	C	C	C	C	C	C	C	C	C
16	36772445	S6J161470897	H	H	H	H	G	G	G	G	G	G	G	G	G	G	G	G	G	H	H	G	G	G	G	H	G	H	H	G	H	G	G	A	H	G	H	H	G	G	G	G	G	G	G	G	H	H	G
16	37002181	SAH161480087	C	C	C	C	C	C	C	C	C	C	C	C	C	C	C	C	C	C	C	C	C	C	C	C	C	C	C	C	C	C	C	C	C	H	H	H	H	H	C	C	C	C	C	C	C	C	C
16	39930146	S6J161597205	H	H	H	H	A	A	A	A	A	A	A	A	A	A	A	A	H	H	A	A	A	A	A	A	A	H	A	A	A	A	A	H	A	A	H	H	A	A	A	A	A	A	A	A	A	A	A
16	46248836	SS6161849953	G	H	H	G	H	T	H	H	H	H	H	G	H	H	H	G	G	G	H	G	G	G	G	G	G	G	G	G	G	H	G	G	G	G	G	G	G	G	H	H	H	H	H	H	H	T	G
16	46937588	SAH161877503	G	G	G	G	G	G	G	G	G	G	G	G	G	G	G	G	G	G	G	G	G	G	G	G	G	G	G	G	G	G	G	G	G	G	G	G	G	G	G	G	G	G	G	G	G	G	G
16	47794107	S6J161911764	H	A	A	H	A	A	A	A	A	A	A	G	H	A	H	G	H	H	H	H	H	H	H	H	H	H	A	A	A	A	A	A	A	H	H	H	H	H	H	A	A	A	A	A	A	A	A
16	48902971	SAH161956118	T	T	T	T	T	T	T	T	T	T	T	T	T	T	T	T	T	T	T	T	T	T	T	T	T	T	T	T	T	T	T	T	T	T	T	T	T	T	T	T	T	T	T	T	T	H	T
16	53213805	S1L162128552	H	H	H	H	G	G	G	G	G	G	G	G	G	G	G	G	G	G	H	G	G	G	G	G	G	G	G	G	G	G	G	H	G	G	H	H	G	G	G	G	G	G	G	G	H	H	H
16	55013533	SAJ162200541	C	C	C	C	C	C	C	C	C	C	C	C	C	C	C	C	C	C	C	C	C	C	C	C	C	C	C	C	C	C	C	C	C	C	C	C	C	C	C	C	C	C	C	C	C	C	C
16	57234631	SNJ162289385	C	C	C	C	C	C	C	C	H	H	C	C	C	C	C	C	H	H	C	C	C	C	C	C	C	H	T	H	T	C	H	H	H	C	H	H	H	H	C	C	H	H	C	C	C	C	C
16	58026214	SAJ162321048	T	T	T	T	T	T	T	T	T	T	T	T	T	T	T	T	T	T	T	T	T	T	T	T	T	T	T	T	T	T	T	T	T	T	T	T	T	T	T	T	T	T	T	T	T	T	T
16	58540835	SBT162341633	T	T	T	T	T	T	T	T	T	T	T	T	T	T	T	T	T	T	T	H	T	H	T	T	H	H	T	T	T	T	T	T	T	T	T	T	T	T	T	T	T	T	T	T	T	T	T
16	61650513	gJAX00422798	H	H	H	H	H	H	H	H	C	C	H	C	C	C	C	C	C	C	H	C	C	C	C	C	C	C	H	T	H	H	T	C	C	C	C	C	C	C	C	C	H	H	C	C	H	H	H
16	64534891	SBR162581395	C	C	C	C	C	C	C	C	C	C	C	C	C	C	C	C	C	C	C	C	C	C	C	C	C	H	C	C	C	C	C	C	C	C	C	C	C	C	C	C	C	C	C	C	C	C	C
16	69100219	SBC162764008	A	H	H	H	H	H	A	A	A	A	A	A	A	A	A	A	A	A	A	A	A	A	A	A	A	A	A	A	A	A	A	A	A	A	A	A	A	A	A	A	A	A	A	A	A	A	A
16	72124439	SAJ162884977	C	H	H	H	C	C	C	C	C	C	C	C	C	C	C	C	C	C	C	C	C	C	C	C	C	C	C	C	C	C	C	C	C	C	C	C	C	C	C	C	C	C	C	C	C	C	C
16	74590947	DZO162983637	C	C	C	C	C	H	H	H	H	H	H	C	C	C	C	C	C	C	C	C	C	C	H	H	C	C	C	C	C	C	C	H	T	H	H	H	T	T	C	C	C	C	C	C	C	C	H
16	75595657	SAH163023826	A	A	A	A	A	A	A	A	A	A	A	A	A	A	A	A	A	A	A	A	A	A	A	A	A	A	A	A	A	A	A	A	A	A	A	A	A	A	A	A	A	A	A	A	A	A	A
16	88395812	gJAX00427290	H	H	H	H	H	G	H	H	H	H	H	G	G	H	G	G	G	G	H	G	H	G	G	G	G	H	G	G	G	G	G	G	G	G	G	G	G	G	H	H	H	H	H	H	G	G	G
16	93296013	SAC163731840	G	G	G	G	G	G	H	H	H	G	G	G	G	G	G	G	G	G	G	G	G	G	G	G	G	G	G	G	G	G	G	H	G	G	G	G	G	G	G	G	G	G	G	G	G	G	G
16	93627571	mUNC27424022	G	G	G	H	G	G	G	G	G	G	G	G	G	G	G	G	G	G	G	G	G	G	G	G	G	G	G	H	G	A	H	G	G	G	H	H	G	G	H	H	H	H	H	H	G	G	G
17	3888228	SAH170155529	A	A	A	A	A	A	H	H	A	H	H	A	H	A	H	A	G	G	H	H	H	A	A	H	A	H	A	A	A	A	A	A	H	A	A	A	H	H	A	H	A	A	A	A	A	A	H
17	4069202	S2R170162768	G	G	G	G	H	G	G	G	G	G	H	G	H	G	H	H	G	G	G	G	G	G	G	G	G	G	G	G	G	G	G	G	G	G	G	G	G	G	G	G	G	G	G	G	G	G	G
17	8188577	S6J170327543	C	C	C	C	C	C	H	H	C	C	H	C	H	C	H	C	C	C	C	C	C	C	C	C	C	C	C	C	C	C	C	C	C	C	C	C	C	C	C	C	C	C	C	C	C	C	C
17	12050105	S6J170482004	C	C	C	C	H	H	H	H	H	H	C	C	C	C	C	C	C	C	C	C	C	C	C	C	C	C	C	H	H	H	H	C	C	C	C	C	C	C	C	C	C	C	C	C	C	C	C
17	12383099	S3N170495323	C	C	C	C	C	C	C	C	C	C	C	H	C	H	C	C	H	H	H	H	C	C	C	H	C	H	C	C	C	C	C	C	C	C	C	C	C	C	C	C	C	C	C	C	C	C	C
17	24505307	SNJ170980212	G	G	G	G	H	H	H	H	H	H	G	G	G	G	G	G	G	G	G	G	G	H	H	G	H	G	G	G	G	G	G	G	H	G	G	G	G	G	H	G	G	G	H	G	H	G	H
17	25917373	SAH171036694	C	H	H	C	H	H	C	C	C	C	H	C	C	C	C	C	H	H	C	H	H	C	H	C	C	C	C	C	C	C	C	C	C	C	C	C	C	C	C	C	C	C	C	C	C	C	C
17	26285179	DZO171051407	T	T	T	T	T	T	T	T	T	T	T	T	T	T	T	T	T	T	T	T	T	T	T	T	T	T	T	T	T	T	T	H	T	T	H	H	H	H	T	T	T	T	T	T	T	T	T
17	30078458	SS1171203138	C	C	C	C	C	C	C	C	H	H	C	C	H	C	H	H	C	C	C	C	C	C	C	C	C	C	C	C	C	C	C	H	C	C	C	C	H	H	C	C	C	C	C	C	C	C	C
17	31793036	SS1171271721	A	A	A	A	A	A	A	A	A	A	A	A	H	A	H	H	A	A	A	A	A	A	A	A	A	A	A	A	A	A	A	A	A	A	A	A	A	A	A	A	A	A	A	A	A	A	A
17	32030647	SS1171281225	G	G	G	G	G	G	G	G	G	G	G	G	H	G	H	H	G	G	G	G	G	G	G	G	G	G	G	G	G	G	G	G	G	G	G	G	G	G	G	G	G	G	G	G	G	G	G
17	34162750	S3C171366510	C	C	C	C	C	C	C	C	C	C	C	C	C	C	C	C	C	H	H	C	H	C	C	C	C	C	C	C	C	C	C	C	C	C	C	C	C	C	H	C	H	H	H	H	H	C	H
17	36770019	SSR171470800	C	C	C	C	C	C	C	C	C	C	C	C	H	H	H	T	C	C	C	C	C	C	C	C	C	C	C	H	H	H	H	C	C	C	C	C	H	H	C	H	C	C	C	C	C	C	C
17	38379852	SAJ171535194	H	H	H	H	C	C	C	C	C	C	C	H	C	H	C	C	C	H	C	C	H	C	C	C	C	C	C	H	H	C	H	C	H	C	C	C	C	C	H	C	C	C	H	C	H	A	H
17	43256285	S6J171730251	G	G	G	G	G	G	G	G	G	G	G	G	H	H	H	H	G	G	G	G	G	G	G	G	G	G	G	G	G	G	G	G	G	G	G	G	G	G	G	G	G	G	G	G	G	G	G
17	44935877	S6J171797435	C	C	C	H	C	C	C	C	C	C	C	C	C	C	C	C	C	C	C	C	C	H	H	C	H	C	C	C	C	C	C	C	C	C	C	C	C	C	C	C	C	C	C	C	C	C	C
17	46196247	SS1171847849	H	A	A	H	A	A	A	A	A	A	A	A	A	A	A	A	H	H	A	A	A	A	A	A	A	A	A	A	A	A	A	A	A	A	A	A	A	A	A	A	A	A	A	A	A	A	A
17	47949481	SNJ171917979	H	G	G	H	G	G	G	G	G	G	G	H	H	H	H	H	H	G	H	H	G	G	G	H	G	H	A	H	H	A	H	H	G	G	H	H	A	H	G	G	H	H	H	H	G	G	G
17	63012611	S6J172520504	C	C	C	C	C	C	C	C	C	C	H	C	H	T	C	T	H	H	C	C	C	C	C	C	C	C	H	H	H	H	H	C	H	H	C	C	C	H	C	H	T	C	C	H	H	H	H
17	65270468	gUNC28194335	T	T	T	T	T	T	T	T	T	T	H	T	T	T	T	T	T	T	H	T	T	T	T	T	T	T	T	T	T	T	T	H	T	T	T	T	T	T	H	H	T	H	H	T	T	T	T
17	66894293	S6R172675771	C	C	C	C	H	A	H	H	C	C	H	C	C	H	C	H	C	H	C	H	H	H	H	C	H	C	H	C	C	H	C	C	C	C	C	C	C	C	C	C	C	C	C	C	C	C	C
17	67752883	S6J172710115	A	A	A	A	H	H	H	H	A	A	H	A	A	H	A	H	A	H	A	H	H	H	H	A	H	A	A	A	A	A	A	A	A	A	A	A	A	A	A	H	H	A	A	A	A	A	A
17	69001971	SS1172760078	G	G	G	G	G	G	G	G	G	G	G	G	G	G	G	G	H	G	H	G	G	G	G	G	G	G	G	G	G	G	G	H	H	H	H	G	G	G	H	G	G	H	H	H	H	G	H
17	70703340	UNC28282900	H	C	H	C	C	C	C	H	H	H	C	H	H	H	H	H	H	A	C	A	A	H	H	H	H	H	C	H	H	H	H	H	H	H	A	H	H	C	C	C	C	C	C	H	C	H	C
17	70879690	gUNC28285676	C	C	C	C	H	H	C	C	C	C	C	H	H	T	H	T	H	T	C	H	H	C	C	H	C	H	C	H	H	H	H	H	H	H	T	H	H	C	C	C	C	C	C	C	C	H	C
17	71966460	SX1172878658	C	C	C	C	H	H	C	C	C	C	C	H	C	H	H	H	C	C	C	C	C	C	C	H	C	H	C	H	H	H	H	H	H	H	T	H	H	C	C	C	C	C	C	C	C	H	C
17	72648306	SS1172905932	A	G	H	H	H	H	G	H	H	H	H	G	G	G	G	G	H	G	H	H	H	H	A	G	A	H	G	G	G	G	G	H	G	G	G	G	G	G	H	G	G	H	H	H	H	G	H
17	75237874	SAJ173009514	H	C	H	C	C	C	C	H	H	H	H	T	H	C	T	C	C	C	C	H	H	H	H	C	H	H	C	C	C	C	C	C	C	C	C	C	C	C	C	C	C	C	C	C	C	H	C
17	81777656	gJAX00448133	T	H	T	T	T	T	H	T	T	H	T	T	T	T	T	T	T	T	H	T	T	T	T	H	T	T	T	H	H	T	T	T	T	T	T	T	T	T	T	H	H	H	H	H	T	T	T
17	86002930	SS1173440117	G	G	G	G	H	G	G	G	H	H	G	G	G	G	G	G	G	G	G	G	G	G	G	G	G	G	G	G	G	G	G	G	H	G	G	G	G	G	H	G	G	G	G	G	G	G	G
17	88219748	gUNC28551366	G	G	G	G	A	H	H	G	H	H	G	G	G	G	G	G	G	G	G	G	G	H	H	G	H	H	G	G	G	G	H	H	H	H	H	G	G	G	G	G	G	G	G	G	H	H	H
17	92624015	gJAX00079569	C	C	C	C	C	C	C	C	C	C	C	C	C	H	C	C	C	C	H	C	C	C	C	C	C	C	C	C	C	C	C	C	C	C	C	C	C	C	H	C	C	H	C	H	C	C	C
17	92820241	SX1173712809	C	C	C	C	C	C	C	C	C	C	C	C	C	H	C	C	C	C	H	C	C	C	C	C	C	C	C	C	C	C	C	C	C	C	C	C	C	C	H	C	C	H	C	H	C	C	C
17	94472185	SAJ173778887	G	G	G	G	A	G	H	G	H	H	G	G	G	G	G	G	G	G	G	G	G	H	H	G	H	H	G	G	G	G	G	A	A	H	A	H	H	H	G	H	H	G	H	G	G	G	G
18	14055393	SAJ180562215	T	T	H	G	H	H	H	H	T	T	H	G	H	H	G	G	G	G	G	G	G	G	G	G	G	G	G	G	G	G	G	H	G	T	G	H	G	G	H	G	G	H	G	H	G	T	H
18	14382163	S6J180575286	T	T	T	T	H	H	H	H	T	T	T	H	H	T	T	T	T	T	T	T	T	T	T	T	T	T	T	T	T	T	T	T	H	T	H	H	H	H	T	T	T	T	T	T	T	T	T
18	14948374	S6J180597934	G	G	G	G	H	H	H	H	G	G	G	H	H	G	G	G	H	H	H	G	G	G	G	G	G	G	G	G	G	G	G	G	H	G	H	H	H	H	G	G	G	G	G	G	G	G	G
18	19750093	gICR4973	T	T	T	T	T	T	T	T	T	T	T	T	T	H	H	H	T	T	T	T	T	T	T	T	T	T	T	T	T	T	T	T	T	T	T	T	T	T	T	T	T	H	H	T	T	T	T
18	24473642	SAH180978945	H	H	H	H	G	G	G	G	G	G	H	G	G	G	G	G	G	H	G	G	G	G	G	G	G	H	G	G	H	H	G	G	H	G	G	G	G	G	G	G	G	G	G	G	G	G	G
18	28191475	DS1051596592	C	C	C	C	C	C	C	C	C	C	C	C	C	C	C	C	H	H	H	H	C	H	H	H	H	H	C	C	C	C	C	H	C	C	H	C	C	C	H	C	C	C	C	C	C	C	C
18	29958285	SSH181198331	C	C	C	C	C	C	C	C	C	C	H	C	C	C	C	C	C	C	C	C	C	C	C	C	C	C	C	C	C	C	C	C	C	C	C	C	C	C	C	C	C	C	C	C	C	C	C
18	30044679	DNJ181201787	A	A	A	A	A	A	A	A	A	A	A	A	A	A	A	A	A	A	A	A	A	A	A	A	A	A	A	A	A	A	A	A	A	A	A	A	A	A	A	A	A	A	A	A	H	H	H
18	30812887	JAX00455206	A	A	A	A	G	H	H	H	A	A	A	A	A	A	A	A	A	A	A	A	A	A	A	A	A	A	A	A	A	A	A	A	A	A	A	A	A	A	A	H	H	A	H	A	A	A	A
18	31934800	SX1181277392	T	T	T	T	G	H	H	H	T	T	T	T	T	T	T	T	T	T	T	T	T	T	T	T	T	T	T	T	T	T	T	T	T	T	T	T	T	T	T	H	H	T	H	T	T	T	T
18	33229385	SX1181329175	C	C	C	C	C	C	C	C	C	C	C	C	C	H	H	H	C	C	C	C	C	C	C	C	C	C	C	C	C	C	C	C	C	C	C	C	C	C	C	C	C	C	C	C	H	H	H
18	35826530	JAX00082209	C	C	C	C	C	C	C	C	C	C	C	C	C	C	C	C	C	C	C	H	H	C	C	C	C	C	H	H	C	C	H	H	C	C	C	C	C	C	H	H	H	H	C	C	H	H	H
18	37762193	SX1181510487	G	G	G	G	G	G	G	G	G	G	H	G	G	G	G	G	H	H	H	G	G	G	G	G	G	G	H	H	G	G	H	G	G	G	G	G	G	G	H	H	H	H	G	G	H	H	H
18	38076934	SBJ181523077	H	G	G	G	H	G	G	G	G	G	G	H	H	G	G	G	H	H	H	H	H	H	H	H	H	H	G	G	G	G	G	G	G	A	G	G	G	G	G	G	G	G	G	G	G	G	G
18	39424641	gUNC29086161	G	H	A	H	G	G	G	G	G	G	G	G	H	G	G	G	G	G	G	G	G	G	G	G	G	G	G	G	G	G	G	H	H	G	H	H	H	H	G	G	G	G	G	G	G	G	G
18	41111837	SNJ181644473	C	C	C	C	C	H	H	H	H	H	C	C	C	C	C	C	C	C	C	C	C	C	C	C	C	C	C	C	C	C	C	C	C	C	C	C	C	C	C	C	C	C	C	C	C	C	C
18	42394718	SAH181695788	T	T	T	T	T	T	H	T	H	H	C	T	T	T	T	T	T	T	T	T	T	T	T	T	T	T	H	H	H	H	H	T	T	T	T	T	T	T	H	H	H	H	T	T	T	T	T
18	44877141	S3C181795085	C	C	C	C	H	H	H	H	H	H	H	C	C	C	C	C	C	C	C	H	C	H	H	H	C	C	C	C	C	H	C	C	C	C	C	C	C	C	C	C	C	C	C	C	C	C	C
18	47240633	S6Y181889625	A	A	A	A	A	A	A	A	A	A	A	H	A	H	H	H	A	A	A	A	A	A	A	A	A	A	A	A	A	A	A	A	A	A	A	A	A	A	A	A	A	A	A	A	H	H	A
18	49159263	gUNC29222308	H	T	H	T	H	T	T	T	T	T	T	T	T	T	T	T	T	T	T	H	H	T	T	T	T	T	T	T	T	T	T	T	H	H	T	T	T	T	T	T	T	T	T	T	T	T	T
18	51017893	UNC29245245	C	C	H	C	H	A	H	A	H	H	C	H	C	H	H	H	H	C	H	H	C	A	A	A	H	H	C	C	C	C	C	C	C	C	C	C	C	C	C	C	C	C	C	C	C	C	C
18	54072615	S6J182162904	C	C	C	C	C	A	H	A	H	H	C	H	C	H	H	H	H	C	H	H	C	A	A	A	H	H	C	C	C	C	C	C	C	C	C	C	C	C	C	C	C	C	C	C	C	C	C
18	54994028	SAH182199761	G	G	G	G	G	H	H	H	H	H	G	G	H	H	H	H	H	H	H	G	G	G	G	G	G	G	H	H	G	A	H	H	G	H	G	H	H	H	G	G	G	G	G	G	G	G	H
18	57754371	UNC29339905	C	C	C	C	C	C	C	C	C	C	C	C	C	C	C	C	C	C	C	C	H	C	C	C	C	C	C	C	C	C	C	H	C	C	C	C	C	C	C	C	C	C	C	C	C	C	C
18	62665959	DNT182506638	C	C	C	C	C	C	C	C	C	C	C	C	C	C	C	C	C	C	C	C	H	C	C	C	C	C	C	C	C	C	C	C	C	C	C	C	C	C	C	C	C	C	C	C	C	C	C
18	64122158	SAH182564886	G	H	H	G	G	H	H	H	H	H	G	G	H	G	G	H	A	A	A	H	H	H	H	H	H	H	H	H	H	H	H	G	G	G	G	G	G	G	H	H	H	G	H	H	G	G	G
18	65665729	SAH182626629	T	H	H	T	T	T	T	T	T	T	T	T	T	T	T	T	T	T	T	T	T	T	T	T	T	T	H	H	T	H	H	T	T	T	T	T	T	T	H	H	H	T	H	H	T	T	T
18	66846118	S2T182673844	C	H	H	C	A	A	A	A	A	A	A	A	A	A	A	A	A	A	A	A	A	A	A	A	A	A	A	A	A	A	A	A	A	A	A	A	A	A	A	A	A	A	A	A	A	A	A
18	67244771	gUNC29490271	G	H	H	G	A	A	A	A	A	A	A	A	A	A	A	A	A	A	A	A	A	A	A	A	A	A	A	A	A	A	A	A	A	A	A	A	A	A	H	A	A	A	A	A	A	A	A
18	74580936	DZO182983237	G	H	H	G	G	G	G	G	G	G	G	G	H	G	G	H	G	G	G	G	G	G	G	G	G	G	G	G	G	G	G	G	G	G	G	G	G	G	H	H	H	G	H	H	H	H	H
18	74781562	S6J182991262	C	C	C	C	C	C	C	C	C	C	C	C	C	C	C	C	C	C	C	C	C	C	C	C	C	C	C	C	C	C	C	H	H	C	C	H	H	H	C	C	C	C	C	C	C	C	C
18	79277125	gUNC29674459	T	T	T	T	T	T	T	T	H	T	T	T	T	T	T	T	T	T	T	T	T	T	T	T	T	T	T	T	T	T	T	H	H	T	T	H	H	H	H	H	H	T	H	H	T	T	T
18	80860022	S6J183234400	G	G	G	G	G	G	G	G	G	G	G	G	G	G	G	G	G	G	G	G	G	G	G	G	G	G	G	G	G	G	G	G	G	G	G	G	G	G	G	G	G	H	G	G	G	G	G
18	81373443	SBJ183254937	C	C	C	C	C	C	C	C	C	C	C	C	T	H	T	T	C	C	C	C	C	C	C	C	C	C	C	C	C	C	C	C	C	C	C	C	C	C	C	H	H	H	H	C	C	C	H
18	82679518	SAH183307180	C	C	C	C	H	C	H	C	H	H	H	H	A	A	A	A	C	C	C	C	C	C	C	C	C	C	C	C	C	H	C	C	C	C	C	C	C	C	H	H	H	C	H	H	C	C	C
18	84124733	SAJ183364989	G	G	G	G	G	G	G	G	H	G	G	H	G	H	G	G	G	G	G	G	G	G	G	G	G	G	G	G	G	G	G	G	G	G	G	G	G	G	G	G	G	G	G	G	G	G	G
19	4959621	SS1190198384	A	A	A	A	A	A	A	A	A	A	A	H	A	A	A	A	A	A	A	A	A	A	A	A	A	A	A	A	A	A	A	A	A	A	A	A	A	A	A	A	A	A	A	A	A	A	A
19	6679635	SFT190267185	C	C	C	C	C	C	H	H	H	H	H	C	C	C	C	C	H	H	C	H	C	H	C	H	H	H	C	C	C	C	C	H	C	H	H	H	C	H	H	C	C	C	C	C	C	C	C
19	17452953	DNJ190698118	T	T	T	T	T	T	T	T	T	T	T	T	T	T	T	T	T	T	T	T	T	T	T	T	T	T	T	T	T	T	T	T	T	T	T	T	T	T	T	T	T	T	T	T	T	T	T
19	21469980	S6J190858799	A	A	A	A	H	H	A	A	A	A	A	A	A	A	A	A	H	H	A	A	A	A	A	A	A	A	A	A	A	A	A	A	A	A	A	A	A	A	A	H	H	A	A	H	H	H	A
19	22853122	SAJ190914124	G	G	G	G	G	G	G	G	G	G	G	H	G	G	G	G	G	G	G	G	G	G	G	G	G	G	G	G	G	G	G	G	H	G	G	G	G	G	G	G	G	G	G	G	G	G	G
19	24549622	SX1190981984	T	T	T	T	T	T	T	T	T	T	T	T	T	H	H	T	T	T	H	T	H	H	H	T	T	T	T	T	T	T	T	H	T	T	T	T	T	T	T	T	T	H	H	T	T	T	T
19	25260467	UNC30110173	H	H	C	C	C	C	C	H	H	C	H	C	C	C	C	C	C	C	C	C	C	C	C	C	C	C	C	C	C	C	C	C	H	C	C	C	C	C	C	C	C	C	C	C	H	H	C
19	28598968	SFT191143958	G	G	G	G	H	H	G	G	G	G	G	G	G	G	G	G	G	G	G	H	G	G	G	G	G	G	G	G	G	H	H	G	G	G	G	G	G	G	G	G	G	G	G	G	H	H	G
19	32202270	SAJ191288090	G	G	G	G	G	H	G	G	G	G	G	H	H	G	G	H	H	H	H	G	G	G	G	G	G	G	H	H	H	G	G	G	G	G	G	G	G	G	G	G	G	G	G	G	G	G	G
19	35755641	DZO191430225	H	H	C	C	C	C	H	C	C	H	C	C	C	C	C	C	C	C	C	C	C	C	C	C	C	C	C	C	C	C	C	C	C	C	C	C	C	C	C	C	C	C	C	C	C	C	C
19	36894857	UNC30268264	C	C	C	C	C	C	C	C	C	C	C	C	C	C	C	C	C	C	C	C	C	C	C	C	C	C	C	C	C	C	C	C	H	C	C	C	C	C	C	H	H	C	H	C	C	C	H
19	37020401	ST2191480816	G	G	G	G	G	G	G	G	G	G	G	G	G	G	G	G	G	G	G	G	G	G	G	G	G	G	G	G	G	H	H	H	H	H	A	H	G	H	G	G	G	G	G	G	H	G	G
19	37923102	gJAX00476871	C	C	C	C	C	C	C	C	C	C	C	C	C	C	C	C	C	C	C	C	C	C	C	C	C	C	C	C	C	C	C	C	C	C	C	C	C	C	C	C	C	C	C	C	C	C	C
19	38525142	SX1191541005	G	G	G	G	G	G	G	G	G	G	G	G	G	G	G	G	H	H	H	G	G	G	G	G	G	G	A	A	H	G	G	G	G	G	G	G	G	G	H	H	H	G	H	G	G	G	G
19	40268443	gUNC30309042	C	C	C	C	C	C	C	C	C	C	C	C	C	C	C	C	H	H	H	C	C	C	C	C	C	C	T	T	H	C	C	C	C	C	C	C	C	C	H	H	H	C	H	C	C	C	C
19	40323170	gUNC30309860	G	G	G	G	G	G	G	G	G	G	G	G	G	G	G	G	G	G	G	G	G	G	G	G	G	G	A	A	H	G	G	G	G	G	G	G	G	G	H	H	H	G	H	G	G	G	G
19	41118657	UNC30324577	C	C	C	C	C	H	C	C	C	C	C	C	C	C	C	C	C	C	C	C	C	C	C	C	C	C	C	C	C	C	C	C	C	C	C	C	C	C	H	H	H	C	H	C	C	C	C
19	43445016	SS1191737800	T	T	T	T	T	H	T	T	T	T	T	T	T	T	T	T	H	H	H	T	T	T	T	T	T	T	T	T	H	H	T	T	T	T	T	T	T	T	T	T	T	T	T	T	T	T	T
19	45377650	S6J191815106	C	C	C	C	C	H	C	C	C	C	C	C	C	C	C	C	H	H	H	H	C	C	C	C	C	C	C	C	C	H	C	H	C	H	H	H	H	H	H	C	C	C	C	C	C	C	C
19	45568082	S6J191822723	G	G	G	G	G	H	G	G	G	G	G	G	G	G	G	G	H	H	H	G	G	G	G	G	G	G	G	G	G	H	G	G	G	G	G	G	G	G	H	G	G	G	G	G	G	G	G
19	45628898	JAX00089456	C	C	C	C	C	H	C	C	C	C	C	C	C	C	C	C	H	H	H	C	C	C	C	C	C	C	C	C	C	H	C	C	C	C	C	C	C	C	H	C	C	C	C	C	C	C	C
19	48429488	UNC30427206	H	H	H	H	C	C	H	C	C	H	C	T	H	T	H	H	H	H	H	H	H	C	C	C	C	C	C	C	C	C	C	H	C	H	H	H	H	H	H	C	C	H	C	H	C	H	H
19	48483409	SAJ191939336	C	C	C	C	C	C	C	C	C	C	C	C	C	C	C	C	C	C	C	C	C	C	C	H	H	H	T	T	C	H	T	C	C	C	C	C	C	C	C	C	C	C	C	C	C	C	H
19	50835256	SAH192033410	H	H	A	C	C	H	C	C	C	C	C	H	H	H	H	C	H	H	H	C	H	C	C	C	C	C	C	C	C	C	C	C	C	C	C	C	C	C	H	H	H	A	H	A	C	C	H
19	52068802	B6_rs30447436	H	H	C	T	T	H	T	T	T	T	T	H	H	H	H	T	H	H	H	T	H	T	T	T	T	T	T	T	T	T	T	T	T	T	T	T	T	T	H	H	H	C	H	C	T	T	H
19	52966814	gUNC30500882	H	H	A	G	G	H	G	G	G	G	G	H	H	H	H	G	H	H	H	G	H	G	G	G	G	G	G	G	G	G	G	G	G	G	G	G	G	G	H	H	H	A	H	A	G	G	H
19	53281906	DNJ192131276	G	G	G	H	H	G	H	G	G	H	H	H	G	H	G	A	G	G	G	H	H	H	H	G	G	G	A	A	G	H	A	H	H	G	G	G	G	G	G	H	H	H	H	H	A	A	H
19	60264015	SAJ192410560	H	H	C	H	C	C	C	C	C	C	C	C	H	C	H	C	C	C	C	C	C	C	C	C	C	C	C	C	C	C	C	C	C	C	C	C	C	C	C	C	C	C	C	C	H	C	C
19	60312603	gJAX00481854	H	H	G	T	T	H	T	H	H	H	T	T	T	T	T	T	H	H	H	T	H	H	T	H	H	H	T	T	H	H	T	T	T	T	T	T	T	T	H	H	H	H	G	H	T	T	T
[truncated: 101 more columns]
